# Supplementary material for: Mitochondrial-related genes markers that predict survival in patients with head and neck squamous cell carcinoma affect immunomodulation through hypoxia, glycolysis, and angiogenesis pathways
Source: Aging (Albany NY). 2023 Oct 4;15(19):10347–69. doi: 10.18632/aging.205081 (PMC10599748; doi:10.18632/aging.205081)
Supplement: Supplementary Table 1 [file aging-15-205081-s001.xlsx]

## Sheet: Supplementary Table 1
Supplementary Table 1. Differential gene between cancer and adjacent tissues.
Tag	logFC	AveExpr	t	P.Value	adj.P.Val	B
NRG2	-1.377	0.405	-20.113	0	0	143.14
MYOC	-2.447	0.395	-19.847	0	0	140.093
ADH1B	-2.44	0.536	-19.649	0	0	137.842
CRISP3	-5.787	1.688	-19.1	0	0	131.588
GPRIN1	2.235	3.736	18.484	0	0	124.62
PLIN1	-1.955	0.435	-18.424	0	0	123.954
COLGALT1	1.896	6.695	18.293	0	0	122.475
TGFB1	2.053	6.859	18.279	0	0	122.315
GPD1	-2.733	0.942	-18.186	0	0	121.275
MYBL2	2.622	6.33	17.89	0	0	117.959
CDCA5	2.319	5.08	17.867	0	0	117.697
CIDEC	-1.649	0.335	-17.792	0	0	116.863
ADH4	-0.77	0.157	-17.74	0	0	116.285
HMGCS2	-2.221	0.535	-17.215	0	0	110.445
DLG2	-0.766	0.28	-17.048	0	0	108.598
KIF2C	2.26	5.061	17.034	0	0	108.446
ADIPOQ	-1.938	0.312	-17.022	0	0	108.318
BIRC5	2.243	5.639	16.925	0	0	107.24
UBE2C	2.412	6.723	16.917	0	0	107.155
PKMYT1	2.209	4.332	16.837	0	0	106.279
CENPA	2.1	4.017	16.532	0	0	102.937
PLK1	2.194	5.065	16.497	0	0	102.555
MFAP2	3.229	5.428	16.482	0	0	102.385
ASPA	-0.861	0.257	-16.457	0	0	102.114
CD276	2.248	6.068	16.454	0	0	102.081
BLOC1S3	1.3	4.494	16.347	0	0	100.912
CDC20	2.274	6.873	16.347	0	0	100.911
FAM107A	-2.335	1.423	-16.295	0	0	100.352
MRGBP	1.567	5.017	16.275	0	0	100.132
COL4A1	3.171	6.843	16.182	0	0	99.118
TPX2	2.38	6.344	16.139	0	0	98.659
ATP6V0A4	-2.728	1.353	-16.072	0	0	97.925
BMP1	2.024	5.021	15.997	0	0	97.114
TK1	2.268	7.342	15.962	0	0	96.735
SLC27A6	-1.862	0.574	-15.939	0	0	96.493
PARP12	1.795	5.028	15.935	0	0	96.448
ARSF	-1.581	0.455	-15.926	0	0	96.355
FSCN1	2.326	8.824	15.924	0	0	96.324
AQP7	-1.141	0.324	-15.899	0	0	96.064
COL4A2	2.935	7.041	15.892	0	0	95.981
CEP55	2.315	5.265	15.875	0	0	95.795
HOMER3	2.055	5.543	15.849	0	0	95.523
MYZAP	-1.982	1.414	-15.848	0	0	95.514
AURKA	2.068	4.876	15.77	0	0	94.671
NETO2	2.052	3.732	15.714	0	0	94.069
SLC52A2	1.497	6.397	15.613	0	0	92.979
WDR66	2.075	3.145	15.562	0	0	92.437
SH3BGRL2	-3.243	2.981	-15.547	0	0	92.282
TMEM132C	-0.952	0.248	-15.541	0	0	92.217
SERPINH1	2.569	7.288	15.54	0	0	92.201
EDN3	-1.999	0.43	-15.514	0	0	91.926
SH2D2A	2.093	3.576	15.473	0	0	91.491
CDCA4	1.667	5.929	15.449	0	0	91.23
KPNA2	1.746	7.329	15.427	0	0	90.999
COL7A1	2.709	6.462	15.417	0	0	90.887
CDC25B	2.028	6.67	15.417	0	0	90.884
CAB39L	-1.462	2.306	-15.401	0	0	90.719
CDC45	2.115	4.467	15.389	0	0	90.596
PSMB2	1.158	6.694	15.378	0	0	90.473
CCNB2	2.014	5.231	15.313	0	0	89.784
WDR53	1.36	4.666	15.302	0	0	89.669
MMP9	4.129	6.646	15.268	0	0	89.305
TRARG1	-0.943	0.167	-15.229	0	0	88.886
GYS2	-1.176	0.257	-15.184	0	0	88.411
AUNIP	1.694	3.006	15.151	0	0	88.064
USB1	1.518	4.904	15.114	0	0	87.674
ACOT7	1.615	5.816	15.114	0	0	87.669
CDC6	2.03	4.209	15.102	0	0	87.544
AURKB	2.238	5.289	15.091	0	0	87.43
SLC26A6	1.476	3.05	15.032	0	0	86.806
UBE2S	1.949	5.32	14.995	0	0	86.417
PLIN4	-2.6	1.308	-14.991	0	0	86.372
TPBG	1.819	5.136	14.949	0	0	85.927
PTK7	1.987	5.932	14.946	0	0	85.897
SHCBP1	1.744	3.68	14.916	0	0	85.582
NRM	1.579	5.326	14.837	0	0	84.747
C1QTNF6	2.602	3.837	14.784	0	0	84.198
LOXL2	3.078	4.856	14.78	0	0	84.156
KIF4A	2.04	4.286	14.776	0	0	84.116
CYP2F1	-1.684	0.381	-14.761	0	0	83.957
RAD51	1.745	3.887	14.755	0	0	83.894
CDCA3	1.791	3.359	14.733	0	0	83.657
PLAU	2.974	7.745	14.637	0	0	82.655
MAP4K2	1.487	3.361	14.622	0	0	82.5
TTYH3	2.177	5.909	14.621	0	0	82.491
PRR11	1.905	4.376	14.615	0	0	82.426
CKS1B	1.779	5.444	14.612	0	0	82.399
CBX3	1.335	6.722	14.54	0	0	81.644
TMEM132A	2.062	5.511	14.538	0	0	81.622
MMP1	5.41	8.176	14.534	0	0	81.588
FMO2	-3.683	2.154	-14.523	0	0	81.469
BCL2L12	1.418	4.819	14.485	0	0	81.07
DLGAP5	1.983	4.578	14.48	0	0	81.024
ZNF707	1.276	3.003	14.466	0	0	80.878
AATF	1.119	5.686	14.466	0	0	80.874
RPN1	1.144	8.141	14.424	0	0	80.444
TAGLN2	1.179	10.293	14.423	0	0	80.434
ARPC1B	1.756	7.219	14.401	0	0	80.199
HJURP	1.999	3.894	14.387	0	0	80.052
SLC38A3	-1.424	0.604	-14.386	0	0	80.047
CDKN3	1.86	4.64	14.372	0	0	79.9
LAMC2	3.87	8.397	14.328	0	0	79.444
TROAP	1.983	3.964	14.327	0	0	79.433
ARFGAP1	1.24	5.224	14.324	0	0	79.402
PLOD1	1.888	6.594	14.308	0	0	79.237
HTR3B	-0.848	0.199	-14.302	0	0	79.18
FAM3D	-4.584	3.269	-14.296	0	0	79.118
SLC66A1	1.035	4.325	14.288	0	0	79.036
AP5Z1	1.137	4.282	14.263	0	0	78.775
MTHFD1L	1.683	4.634	14.246	0	0	78.598
FOXM1	2.33	5.32	14.211	0	0	78.234
CCM2	1.427	4.85	14.207	0	0	78.201
SPAG5	1.896	4.278	14.2	0	0	78.124
WDR54	1.942	4.208	14.182	0	0	77.942
TMEM184B	1.447	6.052	14.18	0	0	77.923
NCLN	1.22	6.403	14.174	0	0	77.855
MUCL3	-0.721	0.134	-14.174	0	0	77.855
C16orf74	2.14	4.602	14.162	0	0	77.729
TACC3	1.663	4.909	14.129	0	0	77.392
GNA12	1.756	5.37	14.122	0	0	77.323
MSANTD3	1.383	4.863	14.098	0	0	77.075
HSD17B6	1.51	2.026	14.096	0	0	77.054
LPCAT1	1.943	5.048	14.092	0	0	77.014
CDCA8	2.001	5.116	14.085	0	0	76.941
RORC	-2.03	1.35	-14.071	0	0	76.801
MMP12	3.785	5.636	14.032	0	0	76.396
MTFR2	1.583	2.924	14.031	0	0	76.395
TPPP2	-0.303	0.075	-14.023	0	0	76.31
ALG3	1.445	5.957	14.015	0	0	76.222
PEBP4	-2.34	0.731	-14.003	0	0	76.098
FEN1	1.656	5.985	14.002	0	0	76.093
KIF18B	1.97	3.796	14.002	0	0	76.091
EXO1	1.84	3.397	13.992	0	0	75.991
SNX10	2.13	3.583	13.99	0	0	75.969
CDH24	1.702	3.481	13.982	0	0	75.887
C9orf152	-1.939	0.69	-13.981	0	0	75.883
TEDC2	1.804	3.14	13.975	0	0	75.82
P3H1	1.954	4.2	13.964	0	0	75.701
ORC6	1.718	3.107	13.957	0	0	75.629
CFTR	-1.454	0.414	-13.918	0	0	75.235
ISG15	3.705	8.641	13.916	0	0	75.217
CDK9	0.992	6.135	13.866	0	0	74.709
EXT1	1.698	5.534	13.859	0	0	74.636
VAV2	1.976	5.185	13.853	0	0	74.573
TRIP13	2.012	4.482	13.849	0	0	74.534
CFL1	1.11	9.105	13.847	0	0	74.506
FZD2	1.947	3.182	13.842	0	0	74.464
PLOD3	2.012	5.2	13.841	0	0	74.449
DCAF15	1.019	5.301	13.805	0	0	74.08
GPD1L	-2.028	3.461	-13.799	0	0	74.025
C16orf89	-1.794	0.617	-13.768	0	0	73.711
MELK	2.058	4.753	13.756	0	0	73.585
KIF23	1.801	4.026	13.748	0	0	73.502
PCGF1	1.007	4.231	13.743	0	0	73.457
CTHRC1	3.375	5.515	13.71	0	0	73.121
NCAPG	1.721	3.98	13.693	0	0	72.949
GTSE1	1.841	3.648	13.681	0	0	72.825
CALR	1.059	10.206	13.676	0	0	72.778
FBXL6	1.457	4.496	13.673	0	0	72.747
NUTF2	1.116	6.329	13.671	0	0	72.728
SCN7A	-0.573	0.165	-13.662	0	0	72.634
COL1A1	4.055	9.422	13.66	0	0	72.618
TXNDC12	1.122	6.007	13.619	0	0	72.203
AGRN	2.015	6.941	13.603	0	0	72.039
SLC38A7	1.201	3.795	13.602	0	0	72.024
BUB1	1.778	3.913	13.597	0	0	71.977
SNAI2	2.004	6.417	13.581	0	0	71.816
MUC21	-5.169	2.15	-13.575	0	0	71.754
TONSL	1.716	3.676	13.543	0	0	71.427
OCIAD2	1.661	6.232	13.526	0	0	71.264
CCL14	-0.902	0.387	-13.489	0	0	70.889
GNB5	1.102	2.873	13.487	0	0	70.868
C6	-0.712	0.159	-13.485	0	0	70.85
CCNE1	1.615	3.647	13.479	0	0	70.788
ARHGEF1	1.114	5.269	13.469	0	0	70.688
PPP1R1A	-2.259	0.671	-13.46	0	0	70.598
SAMD1	1.19	6.138	13.451	0	0	70.511
SPINDOC	1.674	4.688	13.449	0	0	70.492
PLIN5	-1.372	0.722	-13.432	0	0	70.312
GREM2	-1.386	0.618	-13.408	0	0	70.079
CDK1	1.817	5.177	13.403	0	0	70.024
MOGS	1.116	6.138	13.397	0	0	69.967
CYP4B1	-3.285	1.796	-13.388	0	0	69.877
NDC80	1.9	4.118	13.388	0	0	69.876
EFNB1	1.79	7.358	13.375	0	0	69.743
FAM180B	-0.806	0.234	-13.371	0	0	69.705
MMP11	4.015	4.859	13.367	0	0	69.663
GDI1	1.072	6.206	13.367	0	0	69.661
FAM49B	1.16	4.879	13.338	0	0	69.373
KIFC1	1.853	5.231	13.336	0	0	69.355
EME1	1.548	2.348	13.324	0	0	69.23
ATP6V1C1	1.204	5.028	13.317	0	0	69.161
DTL	1.936	3.863	13.312	0	0	69.114
TUBB	1.291	9.593	13.311	0	0	69.105
KLHDC7A	-1.134	0.345	-13.309	0	0	69.084
PRIM2	1.415	3.454	13.308	0	0	69.071
RFC4	1.957	4.806	13.273	0	0	68.728
CENPO	1.39	3.188	13.265	0	0	68.643
COL27A1	1.982	3.545	13.249	0	0	68.486
NCAPH	1.838	4.381	13.245	0	0	68.444
YWHAH	1.062	7.447	13.236	0	0	68.361
GINS1	1.725	4.126	13.227	0	0	68.27
RCC2	1.257	7.594	13.222	0	0	68.223
CCNB1	1.82	6.38	13.206	0	0	68.055
NEK2	1.897	4.095	13.201	0	0	68.009
C11orf24	1.284	5.408	13.183	0	0	67.831
CGNL1	-2.194	1.702	-13.173	0	0	67.728
RTKN	1.378	5.199	13.158	0	0	67.579
RUVBL1	1.286	5.092	13.158	0	0	67.578
PSMD2	1.322	7.944	13.151	0	0	67.517
COL5A2	3.37	6.344	13.13	0	0	67.3
NDE1	1.514	4.531	13.128	0	0	67.287
CIP2A	1.781	3.45	13.118	0	0	67.181
CYBC1	1	4.583	13.105	0	0	67.058
RAD54L	1.729	3.324	13.103	0	0	67.035
PPP1R18	1.544	6.159	13.088	0	0	66.883
CKS2	1.871	7.339	13.087	0	0	66.882
KIAA0930	1.143	5.742	13.086	0	0	66.871
CA9	4.219	4.559	13.079	0	0	66.795
ACOT9	1.259	4.389	13.079	0	0	66.794
NDRG2	-2.332	4.709	-13.078	0	0	66.79
NUP85	1.07	4.739	13.065	0	0	66.663
UBE2Z	0.956	6.409	13.065	0	0	66.663
COL5A1	3.422	6.264	13.057	0	0	66.583
SLC20A1	1.536	5.015	13.041	0	0	66.418
DNMT3B	1.842	2.756	13.026	0	0	66.274
RANBP1	1.332	5.86	13.023	0	0	66.246
ARTN	2.638	3.334	13.004	0	0	66.06
LIMK1	1.337	5.006	13	0	0	66.023
TGFBI	3.383	7.496	12.983	0	0	65.846
IKBIP	1.487	3.958	12.98	0	0	65.825
STX1A	1.532	2.542	12.977	0	0	65.793
TUBG1	1.051	6.192	12.971	0	0	65.732
CCNF	1.597	3.965	12.957	0	0	65.599
HPRT1	1.304	6.271	12.953	0	0	65.557
KIF22	1.293	5.497	12.949	0	0	65.517
PFN1	1.111	10.127	12.948	0	0	65.505
DDX39A	1.241	6.132	12.945	0	0	65.472
CLEC3B	-2.247	2.77	-12.941	0	0	65.435
PCLAF	1.703	4.329	12.931	0	0	65.338
AIM2	3.2	4.251	12.903	0	0	65.063
VASP	1.038	6.528	12.901	0	0	65.044
COBL	-1.951	1.419	-12.9	0	0	65.03
SMR3B	-3.097	0.393	-12.892	0	0	64.955
KNSTRN	1.428	4.212	12.879	0	0	64.824
DERL1	0.996	5.425	12.877	0	0	64.811
BAX	1.113	5.99	12.874	0	0	64.777
MMP14	1.909	8.42	12.873	0	0	64.772
YKT6	1.051	7.078	12.866	0	0	64.696
TMEM138	1.097	3.589	12.859	0	0	64.633
CGAS	1.769	3.95	12.855	0	0	64.592
PLXNA1	1.698	5.747	12.852	0	0	64.565
P3H4	1.975	4.475	12.851	0	0	64.548
CDT1	1.835	4.754	12.841	0	0	64.453
INHBA	3.609	4.72	12.841	0	0	64.452
ECRG4	-1.777	0.692	-12.84	0	0	64.44
CYP3A4	-0.587	0.158	-12.825	0	0	64.299
COL13A1	1.433	1.854	12.825	0	0	64.294
E2F1	2.046	4.497	12.823	0	0	64.279
DEPDC1B	1.673	3.174	12.823	0	0	64.275
AQP4	-0.985	0.239	-12.82	0	0	64.253
LY6K	2.351	4.143	12.816	0	0	64.207
RNASEH2A	1.611	5.766	12.803	0	0	64.081
AUP1	0.838	7.388	12.802	0	0	64.071
CHST11	2.107	4.247	12.793	0	0	63.985
CHTF18	1.582	3.586	12.788	0	0	63.937
HSP90B1	1.208	9.034	12.782	0	0	63.873
HDGF	0.988	8.43	12.779	0	0	63.852
MED30	1.307	4.641	12.768	0	0	63.743
CISD2	0.973	5.097	12.751	0	0	63.572
HMGB3	1.645	5.664	12.75	0	0	63.564
CHEK1	1.392	3.365	12.747	0	0	63.538
ZBTB16	-1.303	0.513	-12.741	0	0	63.474
CENPN	1.472	4.01	12.739	0	0	63.453
ADA	1.85	4.678	12.735	0	0	63.42
SPC24	1.764	3.792	12.72	0	0	63.274
PARN	0.988	5.256	12.718	0	0	63.255
XRCC3	1.299	2.914	12.718	0	0	63.254
KIF14	1.742	2.812	12.713	0	0	63.206
IFI6	3.445	9.48	12.705	0	0	63.122
CD300LG	-0.481	0.135	-12.7	0	0	63.074
DNAJB11	1.284	5.695	12.699	0	0	63.065
QSOX2	1.416	4.15	12.679	0	0	62.87
BRAT1	1.166	4.773	12.676	0	0	62.846
AP2M1	1.232	8.403	12.675	0	0	62.828
HOXD11	2.57	2.668	12.674	0	0	62.826
UFD1	0.949	4.687	12.674	0	0	62.824
IRF3	1.105	5.597	12.657	0	0	62.662
SPRY4	1.776	3.595	12.656	0	0	62.644
HOXD9	1.807	3.071	12.651	0	0	62.599
CERS5	0.994	4.166	12.627	0	0	62.363
CCNA2	1.83	5.324	12.622	0	0	62.321
PSMB4	0.965	8.244	12.622	0	0	62.313
TMEM238L	-1.644	0.771	-12.618	0	0	62.276
MORC2	1.165	4.865	12.604	0	0	62.142
AGTRAP	1.504	6.451	12.6	0	0	62.102
SPC25	1.555	3.707	12.599	0	0	62.095
STK3	1.088	3.251	12.593	0	0	62.032
HAUS8	1.239	2.69	12.584	0	0	61.95
LINGO4	-0.608	0.187	-12.575	0	0	61.858
COL12A1	3.031	5.722	12.573	0	0	61.846
ADAMTS2	2.946	4.387	12.565	0	0	61.76
SLC16A1	1.869	6.306	12.564	0	0	61.752
MYRIP	-0.93	0.378	-12.563	0	0	61.743
WDHD1	1.588	3.546	12.555	0	0	61.67
TMSB10	1.524	12.693	12.553	0	0	61.649
YEATS2	1.594	4.377	12.551	0	0	61.627
ACD	1.162	4.345	12.545	0	0	61.576
STATH	-4.365	1.288	-12.544	0	0	61.558
SLC25A17	0.985	4.321	12.54	0	0	61.525
PDIA5	1.54	4.237	12.536	0	0	61.481
STC2	2.428	3.268	12.534	0	0	61.468
FAAP24	1.218	2.83	12.534	0	0	61.462
ENTR1	1.178	5.239	12.534	0	0	61.461
MCM2	2.06	5.961	12.526	0	0	61.39
ULBP2	2.222	4.835	12.515	0	0	61.283
ITGA5	2.586	5.828	12.509	0	0	61.221
CERCAM	2.284	4.817	12.509	0	0	61.219
UHRF1	1.861	4.013	12.497	0	0	61.104
SOCS1	2.034	4.566	12.495	0	0	61.084
RACGAP1	1.515	5.226	12.485	0	0	60.99
GNPDA1	1.019	5.02	12.477	0	0	60.917
RAB34	1.399	5.899	12.475	0	0	60.892
TBC1D10B	0.803	5.165	12.475	0	0	60.891
UBE2T	1.784	5.456	12.468	0	0	60.827
SNRPB	1.156	9.121	12.465	0	0	60.801
SUPT7L	0.866	4.396	12.454	0	0	60.691
MED15	1.118	5.414	12.448	0	0	60.632
IFI27	2.765	8.477	12.433	0	0	60.49
MAPT	-1.493	0.776	-12.429	0	0	60.45
PDIA4	1.442	7.805	12.427	0	0	60.436
TMEM189	1.138	5.197	12.425	0	0	60.41
RGS19	1.196	4.759	12.422	0	0	60.385
MARVELD1	1.847	5.906	12.414	0	0	60.309
EIF5A2	1.658	2.881	12.414	0	0	60.306
FANCI	1.631	4.337	12.414	0	0	60.302
STX6	0.944	5.259	12.399	0	0	60.166
SMUG1	0.844	4.137	12.397	0	0	60.14
GINS2	1.741	4.173	12.389	0	0	60.064
TCF3	1.34	5.535	12.389	0	0	60.062
BST2	3.053	8.727	12.377	0	0	59.951
MIIP	1.153	4.714	12.369	0	0	59.872
ESRRG	-0.891	0.301	-12.362	0	0	59.804
NUF2	1.755	3.679	12.356	0	0	59.749
CENPI	1.464	2.532	12.352	0	0	59.714
ASF1B	1.886	5.266	12.335	0	0	59.547
PFDN2	1.13	7.831	12.335	0	0	59.544
GMNN	1.503	4.686	12.333	0	0	59.53
CPSF3	0.902	5.32	12.325	0	0	59.448
PLAUR	1.915	5.236	12.324	0	0	59.446
POGLUT2	1.549	3.25	12.311	0	0	59.315
TRAM2	1.824	4.459	12.306	0	0	59.27
HSF1	1.008	6.156	12.304	0	0	59.249
ANGPTL1	-1.821	0.997	-12.301	0	0	59.218
MARCKSL1	1.835	7.346	12.301	0	0	59.218
FUCA2	1.189	5.653	12.296	0	0	59.177
GPT	-1.886	1.53	-12.278	0	0	59.001
DSCC1	1.515	3.448	12.264	0	0	58.868
VAC14	0.876	4.517	12.261	0	0	58.835
TMPRSS11B	-3.881	1.831	-12.252	0	0	58.756
CRISP2	-1.057	0.221	-12.25	0	0	58.737
KDM1A	1.009	5.989	12.247	0	0	58.705
SKA2	1.166	5.236	12.246	0	0	58.695
MYO1B	2.043	5.948	12.242	0	0	58.659
DCBLD1	1.953	4.051	12.241	0	0	58.652
BUB3	1.005	5.187	12.238	0	0	58.62
HOXD10	2.658	3.025	12.232	0	0	58.562
ALG1L	2.334	4.869	12.232	0	0	58.559
LMNB2	1.466	6.619	12.227	0	0	58.517
KRT40	-1.057	0.278	-12.222	0	0	58.469
SLC2A1	2.314	8.949	12.218	0	0	58.425
BRMS1	1.261	6.686	12.204	0	0	58.298
ORC1	1.706	3.742	12.202	0	0	58.28
CHST2	2.653	4.62	12.18	0	0	58.071
LRFN4	1.71	4.623	12.177	0	0	58.042
PACC1	1.252	3.643	12.175	0	0	58.015
ATAD2	1.8	4.622	12.172	0	0	57.995
TYMP	2.145	8.228	12.172	0	0	57.994
CKAP2L	1.72	3.653	12.172	0	0	57.988
CRYM	-1.774	0.922	-12.17	0	0	57.971
SKA1	1.621	3.548	12.17	0	0	57.968
PIP	-4.082	1.165	-12.165	0	0	57.928
YDJC	1.298	5.352	12.162	0	0	57.899
ZNF200	0.863	2.443	12.152	0	0	57.804
ERF	1.266	5.819	12.151	0	0	57.793
TP53I13	1.18	4.333	12.15	0	0	57.78
PTTG1	1.681	6.229	12.144	0	0	57.726
PSMA7	0.933	8.522	12.138	0	0	57.667
SMIM5	-1.809	1.602	-12.133	0	0	57.62
SERPINE1	3.369	7.516	12.13	0	0	57.588
TRMT112	1.04	7.9	12.128	0	0	57.572
SLC6A1	-1.092	0.555	-12.123	0	0	57.52
IL11	2.458	2.665	12.12	0	0	57.497
TARDBP	0.703	5.843	12.114	0	0	57.443
ARPC5	0.802	5.744	12.111	0	0	57.414
SHKBP1	0.962	5.997	12.108	0	0	57.382
MCM5	1.567	5.41	12.106	0	0	57.359
CDC25C	1.546	2.614	12.101	0	0	57.312
MED10	1.207	5.835	12.1	0	0	57.308
MAL	-5.27	4.283	-12.1	0	0	57.302
SAE1	1.042	6.682	12.095	0	0	57.259
SORBS2	-1.673	1.226	-12.091	0	0	57.218
RAN	0.932	7.806	12.069	0	0	57.01
RAB32	1.602	5.802	12.065	0	0	56.971
GNA14	-1.211	1.032	-12.064	0	0	56.961
SNRPA1	1.071	4.865	12.058	0	0	56.913
DYNAP	-2.807	1.052	-12.05	0	0	56.834
IGF2BP2	2.713	5.126	12.038	0	0	56.722
SPATS2	1.144	3.901	12.036	0	0	56.696
P4HA1	1.78	5.714	12.035	0	0	56.695
SLC2A6	1.826	2.841	12.035	0	0	56.695
BUB1B	1.724	3.991	12.034	0	0	56.681
PMEPA1	2.493	5.762	12.032	0	0	56.666
BOP1	1.405	6.457	12.032	0	0	56.663
CCT3	0.853	7.954	12.028	0	0	56.629
SPINK8	-1.148	0.33	-12.027	0	0	56.612
NUDT1	1.423	5.299	12.02	0	0	56.549
SLC2A4	-1.953	1.076	-12.019	0	0	56.543
ADRM1	0.846	7.762	12.019	0	0	56.54
RANGAP1	1.026	7.161	12.015	0	0	56.5
INF2	1.238	5.298	12.009	0	0	56.444
PSRC1	1.483	3.44	12.006	0	0	56.413
SMS	1.356	6.76	11.989	0	0	56.258
PPM1G	0.886	6.88	11.985	0	0	56.216
NCBP2	1.223	5.763	11.978	0	0	56.156
PRC1	1.669	5.106	11.978	0	0	56.15
TNFAIP8L1	1.252	3.74	11.973	0	0	56.108
COL4A5	2.213	4.388	11.968	0	0	56.055
DIPK1A	1.325	4.073	11.96	0	0	55.983
DGUOK	1.037	6.324	11.959	0	0	55.976
PDIA3	1.037	8.41	11.954	0	0	55.923
FBXO45	1.289	4.867	11.951	0	0	55.895
POLD1	1.335	4.744	11.949	0	0	55.875
PLCG1	1.098	4.361	11.941	0	0	55.803
C1orf216	1.177	3.668	11.927	0	0	55.675
MCM10	1.535	3.078	11.927	0	0	55.67
NUCB2	-1.3	3.96	-11.926	0	0	55.665
FKBP1A	0.923	8.133	11.918	0	0	55.59
PRELID3A	1.28	1.897	11.91	0	0	55.515
KIF18A	1.555	2.939	11.904	0	0	55.452
ZWINT	1.622	5.602	11.901	0	0	55.428
ADPGK	1.097	4.59	11.897	0	0	55.39
ECE2	1.334	3.355	11.894	0	0	55.363
TF	-2.594	1.334	-11.892	0	0	55.342
HOXC13	2.428	3.186	11.891	0	0	55.336
LPO	-1.866	0.375	-11.885	0	0	55.28
IMPDH1	1.473	6.127	11.876	0	0	55.197
SLC3A2	1.377	7.652	11.865	0	0	55.086
KLF7	1.74	4.072	11.854	0	0	54.986
MBOAT7	1.043	5.423	11.85	0	0	54.952
FUT6	-2.915	1.919	-11.85	0	0	54.949
USF1	0.977	5.791	11.85	0	0	54.944
SMCO1	-1.382	0.368	-11.848	0	0	54.932
CKAP4	1.075	7.74	11.848	0	0	54.929
DHRS7C	-1.986	0.46	-11.848	0	0	54.927
PUF60	0.998	6.809	11.842	0	0	54.873
TCEAL6	-0.336	0.073	-11.84	0	0	54.854
CSNK1E	1.016	5.934	11.84	0	0	54.852
LRRC42	0.913	5.751	11.834	0	0	54.796
MFSD10	1.299	6.119	11.833	0	0	54.793
ZDHHC18	0.9	5.049	11.829	0	0	54.751
ABL2	1.342	3.518	11.828	0	0	54.746
SIAH1	1.131	3.169	11.822	0	0	54.689
PTHLH	3.617	6.426	11.819	0	0	54.658
RRM2	1.725	5.674	11.809	0	0	54.561
RECQL4	1.684	4.468	11.783	0	0	54.322
EIF2AK2	1.496	4.765	11.782	0	0	54.309
ADAM12	2.765	3.392	11.776	0	0	54.255
MTBP	1.203	1.948	11.772	0	0	54.222
KTI12	0.861	4.138	11.763	0	0	54.14
SLC46A2	-0.637	0.271	-11.76	0	0	54.105
RNPS1	0.864	5.496	11.759	0	0	54.094
RAB5C	0.782	6.717	11.754	0	0	54.051
TEDC1	1.307	3.136	11.753	0	0	54.039
ECT2	1.874	5.053	11.75	0	0	54.015
ELF4	1.564	5.472	11.745	0	0	53.963
PHF5A	1.018	6.319	11.743	0	0	53.947
TTK	1.581	3.734	11.732	0	0	53.847
MRPL13	1.012	4.913	11.721	0	0	53.744
ISY1	0.98	4.337	11.719	0	0	53.723
TIMELESS	1.572	4.872	11.718	0	0	53.714
DAGLB	0.907	4.032	11.713	0	0	53.671
POLR2G	0.977	6.422	11.709	0	0	53.631
PTGFRN	1.576	7.092	11.708	0	0	53.619
DDX56	0.877	6.003	11.707	0	0	53.61
CCDC160	-1.124	0.386	-11.7	0	0	53.547
PPIA	0.898	8.202	11.692	0	0	53.473
THRSP	-1.312	0.296	-11.683	0	0	53.395
GJC1	1.789	2.214	11.668	0	0	53.254
DPM2	1.048	5.643	11.665	0	0	53.225
ACP5	1.606	6.374	11.659	0	0	53.166
PSMD9	0.721	3.487	11.657	0	0	53.152
MT1A	-2.014	1.243	-11.653	0	0	53.108
DTYMK	1.282	5.301	11.652	0	0	53.106
MAD2L1	1.514	3.919	11.647	0	0	53.054
CIDEA	-1.773	0.849	-11.637	0	0	52.968
IQGAP3	1.673	3.669	11.63	0	0	52.896
ANLN	1.932	5.249	11.618	0	0	52.787
SEMA4F	1.434	2.724	11.617	0	0	52.776
MAD2L2	1.261	4.959	11.617	0	0	52.775
EIF3B	0.983	6.736	11.614	0	0	52.752
ERBB4	-0.628	0.181	-11.611	0	0	52.719
AGFG2	-1.352	3.442	-11.61	0	0	52.712
PSMD3	0.899	6.819	11.609	0	0	52.702
ZNF526	0.846	3.525	11.606	0	0	52.674
POLA2	1.234	3.961	11.602	0	0	52.642
MYO9B	1.069	5.01	11.599	0	0	52.611
MGME1	1.284	5.304	11.598	0	0	52.598
VSIG2	-2.638	1.709	-11.597	0	0	52.59
MOB3A	1.123	5.757	11.594	0	0	52.562
PPP4C	0.782	7.103	11.589	0	0	52.524
RAC2	1.961	6.02	11.587	0	0	52.497
CNIH4	0.83	4.636	11.585	0	0	52.482
TIMP4	-1.468	0.959	-11.583	0	0	52.465
MCM4	1.521	6.184	11.576	0	0	52.397
RRAGD	-1.971	3.129	-11.568	0	0	52.326
PRH2	-3.951	0.978	-11.565	0	0	52.301
LMF2	1.027	6.673	11.562	0	0	52.272
DEPDC1	1.493	3.178	11.561	0	0	52.261
SEC61A1	0.907	8.121	11.552	0	0	52.18
MC5R	-0.5	0.111	-11.55	0	0	52.159
PSMC3IP	1.354	2.807	11.547	0	0	52.129
RAD51AP1	1.772	3.773	11.546	0	0	52.12
PSMA4	0.939	5.917	11.544	0	0	52.099
EMC8	0.839	4.433	11.543	0	0	52.098
EFTUD2	0.855	5.41	11.543	0	0	52.097
GSDME	1.938	3.484	11.542	0	0	52.089
MFSD12	1.143	5.182	11.542	0	0	52.087
DCAF13	1.065	4.304	11.538	0	0	52.048
FST	2.667	6.017	11.537	0	0	52.035
XPO6	0.893	5.741	11.536	0	0	52.025
POLR2K	1.022	6.096	11.526	0	0	51.938
PSMD11	0.967	6.06	11.522	0	0	51.902
XYLT2	1.228	4.609	11.513	0	0	51.817
RAE1	0.908	4.591	11.512	0	0	51.81
CLPTM1L	1.164	5.942	11.504	0	0	51.736
EIF1AD	0.833	4.947	11.504	0	0	51.735
C1QTNF7	-0.744	0.347	-11.503	0	0	51.728
MCM7	1.586	6.917	11.496	0	0	51.663
FNDC5	-2.048	1.114	-11.492	0	0	51.621
SLC19A1	1.227	2.433	11.489	0	0	51.594
KIF20A	1.845	4.692	11.483	0	0	51.538
RTN4R	1.578	3.11	11.471	0	0	51.427
PSMD14	0.872	5.147	11.469	0	0	51.411
TREM2	2.329	4.589	11.464	0	0	51.368
NUP37	0.981	4.556	11.464	0	0	51.368
KIF3C	1.718	3.288	11.463	0	0	51.358
CENPL	1.197	2.658	11.457	0	0	51.304
ESS2	0.754	3.699	11.451	0	0	51.245
MYLK3	-1.412	0.359	-11.446	0	0	51.206
ATP1B3	1.468	8.877	11.441	0	0	51.154
GNB1	0.929	7.447	11.437	0	0	51.118
IGSF8	1.121	6.136	11.436	0	0	51.11
CHPF2	1.16	5.796	11.436	0	0	51.108
XRCC2	1.405	2.221	11.433	0	0	51.085
TCOF1	1.166	4.675	11.432	0	0	51.071
B4GALT2	0.944	6.096	11.423	0	0	50.993
INTS8	0.982	3.94	11.423	0	0	50.99
MKI67	1.824	5.15	11.421	0	0	50.969
CCT5	1.177	7.192	11.42	0	0	50.963
CTNNBL1	0.898	5.353	11.416	0	0	50.922
CENPF	1.832	4.36	11.415	0	0	50.919
S1PR5	1.653	4.318	11.41	0	0	50.874
SENP5	1.174	4.4	11.408	0	0	50.857
NCS1	1.261	5.444	11.397	0	0	50.751
FMNL3	1.406	3.104	11.392	0	0	50.708
TBC1D31	1.02	2.133	11.391	0	0	50.7
FUS	0.936	6.168	11.391	0	0	50.698
TBRG4	0.913	5.486	11.391	0	0	50.696
ATIC	1.002	5.87	11.387	0	0	50.657
HTATIP2	1.176	6.099	11.385	0	0	50.647
CENPE	1.465	2.961	11.381	0	0	50.602
UBE2I	0.71	5.088	11.378	0	0	50.579
STIP1	1.021	7.155	11.369	0	0	50.497
RMI2	1.803	4.309	11.359	0	0	50.404
ZNF598	0.95	5.621	11.356	0	0	50.38
TOR1A	0.908	5.078	11.355	0	0	50.365
SHARPIN	0.937	6.132	11.353	0	0	50.348
FSD2	-0.846	0.192	-11.348	0	0	50.308
EBNA1BP2	0.97	6.116	11.346	0	0	50.287
RAB31	1.597	6.273	11.345	0	0	50.272
CCN4	2.393	2.98	11.344	0	0	50.266
SFXN3	1.476	4.662	11.341	0	0	50.238
AC011499.1	-0.712	0.325	-11.338	0	0	50.214
FAM189A2	-1.879	1.485	-11.327	0	0	50.113
ADAM8	1.985	4.329	11.326	0	0	50.106
TOR2A	0.941	3.663	11.326	0	0	50.106
CEP131	1.214	3.882	11.322	0	0	50.062
RELT	1.202	2.948	11.317	0	0	50.024
ENO2	2.396	4.342	11.31	0	0	49.962
SIN3B	0.944	4.198	11.308	0	0	49.936
HOXC9	1.68	1.776	11.303	0	0	49.89
PARP14	1.698	5.212	11.299	0	0	49.858
HOXD8	1.382	2.453	11.298	0	0	49.853
DAZAP1	0.758	5.374	11.296	0	0	49.834
LEMD2	0.886	4.593	11.293	0	0	49.807
CLIC4	1.497	6.829	11.282	0	0	49.701
STARD4	1.492	3.439	11.281	0	0	49.696
ACOX2	-1.046	0.988	-11.281	0	0	49.695
ADAR	1.22	7.032	11.279	0	0	49.678
ZFP64	1.164	3.709	11.277	0	0	49.654
ENO1	1.015	10.812	11.276	0	0	49.648
SKA3	1.408	3.627	11.275	0	0	49.637
SART1	0.972	6.115	11.274	0	0	49.628
CMSS1	1.179	4.45	11.27	0	0	49.594
UCN2	1.983	3.182	11.258	0	0	49.483
NACC1	0.978	6.089	11.255	0	0	49.461
SLC15A3	1.929	4.243	11.254	0	0	49.447
ZCCHC17	0.748	5.726	11.252	0	0	49.431
LAMB1	1.764	5.908	11.251	0	0	49.422
ITGB1BP1	0.825	4.383	11.251	0	0	49.417
JOSD1	1.092	6.024	11.238	0	0	49.305
DSN1	1.307	4.56	11.238	0	0	49.302
COL3A1	3.452	9.227	11.233	0	0	49.26
GALNT2	1.384	5.939	11.225	0	0	49.187
ARHGAP11A	1.529	3.806	11.219	0	0	49.13
MTERF3	1.122	5.021	11.218	0	0	49.124
TOP2A	1.984	5.913	11.216	0	0	49.104
KIAA2013	0.764	6.064	11.216	0	0	49.1
PRKD2	0.86	5.435	11.212	0	0	49.07
PYCR3	1.244	4.505	11.212	0	0	49.069
PCED1B	1.4	3.187	11.21	0	0	49.047
HMMR	1.671	3.716	11.208	0	0	49.028
FANCA	1.285	2.516	11.199	0	0	48.953
ANKLE2	0.93	4.393	11.199	0	0	48.952
MPLKIP	0.897	3.578	11.199	0	0	48.947
HASPIN	1.37	2.649	11.198	0	0	48.941
DNAJC8	0.709	6.526	11.193	0	0	48.897
PRKCSH	0.952	7.41	11.175	0	0	48.731
PPDPFL	-1.597	0.391	-11.174	0	0	48.723
FOXD1	1.901	2.993	11.172	0	0	48.704
HS1BP3	0.886	3.504	11.171	0	0	48.695
TCP11L1	1.162	3.03	11.166	0	0	48.651
CTPS1	1.005	5.069	11.162	0	0	48.618
SCNM1	0.837	4.669	11.162	0	0	48.617
B3GAT3	1.224	5.456	11.162	0	0	48.616
SPX	-0.916	0.292	-11.162	0	0	48.612
FADS3	1.879	3.401	11.16	0	0	48.598
RHBDD3	1.126	4.543	11.156	0	0	48.556
PES1	0.937	6.304	11.15	0	0	48.502
KRT4	-6.238	5.389	-11.142	0	0	48.437
KNTC1	1.416	2.989	11.14	0	0	48.419
PPP1R3C	-2.774	3.106	-11.135	0	0	48.375
PVR	1.204	5.402	11.135	0	0	48.367
NXPH4	2.521	4.436	11.133	0	0	48.352
RIPK2	1.143	4.43	11.124	0	0	48.274
E2F7	1.758	2.889	11.124	0	0	48.267
ESM1	1.886	2.589	11.12	0	0	48.238
SAC3D1	1.272	4.639	11.115	0	0	48.195
VMP1	1.195	5.842	11.115	0	0	48.192
CDCA2	1.548	3.417	11.115	0	0	48.192
OIP5	1.514	3.484	11.115	0	0	48.191
NUDCD1	1.199	4.311	11.112	0	0	48.16
PGF	1.963	4.183	11.107	0	0	48.12
MAN1B1	1.091	5.164	11.1	0	0	48.052
CLSPN	1.603	2.746	11.097	0	0	48.026
EMC1	1.086	4.784	11.096	0	0	48.02
PSMC4	0.77	7.106	11.092	0	0	47.983
ZIC2	2.209	2.445	11.091	0	0	47.972
SCIN	-1.679	1.123	-11.063	0	0	47.718
SOX12	1.544	3.978	11.062	0	0	47.717
NVL	0.885	3.667	11.061	0	0	47.702
NUSAP1	1.76	5.645	11.058	0	0	47.679
STAT2	1.408	5.983	11.058	0	0	47.677
PWP1	0.762	5.986	11.05	0	0	47.605
LRR1	1.095	4.028	11.046	0	0	47.569
HSPBAP1	1.038	2.83	11.04	0	0	47.52
TMEM250	0.944	6.045	11.04	0	0	47.514
NEU1	0.976	5.132	11.038	0	0	47.497
MED27	0.963	5.099	11.036	0	0	47.478
AP1M1	0.803	3.592	11.035	0	0	47.467
TNFRSF12A	1.991	6.955	11.034	0	0	47.459
SCRN1	1.556	5.519	11.027	0	0	47.399
DDX55	0.934	3.389	11.026	0	0	47.386
ODF2	1.082	4.55	11.022	0	0	47.356
ODF4	-0.358	0.131	-11.016	0	0	47.303
THY1	2.374	4.952	11.012	0	0	47.261
IL22	-0.79	0.181	-11.006	0	0	47.214
CLCN7	0.934	4.397	11.006	0	0	47.21
CKAP2	1.356	5.059	11.001	0	0	47.166
TAP2	1.387	5.154	10.995	0	0	47.114
LPAR2	1.109	4.299	10.987	0	0	47.039
PSMB3	1.001	8.346	10.986	0	0	47.034
SPHK1	1.556	5.435	10.985	0	0	47.025
ETFDH	-0.909	3.651	-10.982	0	0	46.992
FAM3B	-3.302	2.006	-10.974	0	0	46.927
NME1	1.077	5.722	10.969	0	0	46.882
CPSF1	1.052	5.565	10.967	0	0	46.864
RCE1	1.004	4.74	10.963	0	0	46.83
SUMO3	0.928	6.972	10.961	0	0	46.806
DEDD2	0.876	5.502	10.96	0	0	46.798
KAT2B	-1.433	3.236	-10.96	0	0	46.795
MND1	1.427	3.163	10.957	0	0	46.771
HOXB7	2.813	3.501	10.956	0	0	46.762
CACNB4	-0.699	0.329	-10.951	0	0	46.718
PDLIM7	1.483	5.735	10.949	0	0	46.701
PEF1	0.755	6.946	10.949	0	0	46.701
IER5L	1.504	3.892	10.945	0	0	46.664
COTL1	1.457	5.724	10.943	0	0	46.65
CCSAP	1.157	2.989	10.94	0	0	46.619
FKBP9	1.446	6.255	10.933	0	0	46.555
PIF1	1.374	2.111	10.93	0	0	46.528
RHOC	1.22	6.918	10.929	0	0	46.525
SELENBP1	-2.237	2.93	-10.929	0	0	46.522
COMMD5	0.844	4.943	10.928	0	0	46.514
NUP62	1.002	5.543	10.927	0	0	46.504
GPR12	-0.515	0.086	-10.926	0	0	46.499
SPARC	2.501	9.011	10.918	0	0	46.422
SHFL	1.215	4.164	10.912	0	0	46.368
FGD6	1.498	3.612	10.911	0	0	46.365
LAMB3	2.155	8.848	10.911	0	0	46.363
SDF4	0.898	6.557	10.91	0	0	46.354
STK10	1.223	3.805	10.908	0	0	46.337
UTP6	0.79	4.5	10.906	0	0	46.319
DBF4B	1.092	2.128	10.905	0	0	46.304
TMEM213	-1.34	0.277	-10.9	0	0	46.265
MSN	1.6	8.409	10.898	0	0	46.245
FNDC3B	1.598	4.481	10.896	0	0	46.224
SMARCD1	0.998	5.398	10.892	0	0	46.194
CPEB3	-0.999	1.666	-10.889	0	0	46.167
LASP1	1.124	6.656	10.889	0	0	46.163
TRIM11	0.829	3.702	10.888	0	0	46.154
GALNS	1.274	3.585	10.887	0	0	46.149
PSMB1	0.92	7.845	10.886	0	0	46.142
CTSV	2.276	5.318	10.884	0	0	46.122
FANCB	1.018	1.605	10.884	0	0	46.119
AP1S1	1.041	6.65	10.881	0	0	46.098
BICD1	1.235	2.127	10.88	0	0	46.086
ZG16B	-3.897	2.178	-10.88	0	0	46.084
WNT7B	1.88	5.31	10.879	0	0	46.079
KIF11	1.503	4.826	10.872	0	0	46.016
ELOC	0.843	5.076	10.871	0	0	46.008
LGALS1	2.135	9.514	10.871	0	0	46.007
RPUSD1	0.934	5.153	10.871	0	0	46.006
POP7	0.924	6.684	10.867	0	0	45.97
E2F4	0.918	6.073	10.866	0	0	45.962
COL16A1	1.985	5.108	10.865	0	0	45.953
UBE2L3	0.683	6.483	10.863	0	0	45.934
PLK4	1.348	3.274	10.86	0	0	45.91
GLRX3	0.832	5.663	10.855	0	0	45.867
GALNT18	1.554	5.024	10.852	0	0	45.838
PDPN	2.311	6.309	10.842	0	0	45.752
MRPL47	1.125	6.674	10.838	0	0	45.715
PYGM	-3.155	1.352	-10.837	0	0	45.705
GPR176	2.213	3.463	10.836	0	0	45.691
MTFR1	1.094	4.611	10.835	0	0	45.682
ABCA8	-1.281	0.738	-10.832	0	0	45.66
ADAMTSL2	1.27	2.06	10.829	0	0	45.635
FOXK2	0.842	4.656	10.825	0	0	45.596
POLR2H	1.252	5.566	10.823	0	0	45.58
PAIP2B	-1.241	2.264	-10.821	0	0	45.566
PLEK2	2.132	6.624	10.82	0	0	45.554
FLAD1	0.865	5.132	10.819	0	0	45.542
CHN1	1.589	2.793	10.811	0	0	45.469
ANGPTL5	-0.418	0.113	-10.804	0	0	45.415
RPA3	1.146	4.394	10.804	0	0	45.41
TFG	0.901	6.514	10.797	0	0	45.347
STK17A	1.285	5.413	10.792	0	0	45.305
VPS33A	0.599	2.959	10.792	0	0	45.301
IPO9	1.071	4.56	10.783	0	0	45.224
MAPRE1	0.942	7.453	10.782	0	0	45.217
RCN3	2.354	5.227	10.777	0	0	45.171
TNMD	-0.577	0.113	-10.777	0	0	45.171
TRIM28	0.919	7.98	10.775	0	0	45.151
MUC7	-3.523	0.859	-10.774	0	0	45.144
PIMREG	1.758	3.373	10.771	0	0	45.118
OGFR	1.018	5.232	10.77	0	0	45.108
VPS72	0.729	4.857	10.77	0	0	45.106
FBXO40	-1.447	0.365	-10.768	0	0	45.092
PDK4	-2.672	2.275	-10.767	0	0	45.084
FTSJ1	0.864	5.835	10.764	0	0	45.06
TPST2	0.892	4.264	10.761	0	0	45.03
CRNN	-5.88	4.262	-10.76	0	0	45.026
TNFRSF4	1.669	2.852	10.759	0	0	45.014
CCNQ	0.979	5.392	10.758	0	0	45.006
MPV17L2	0.923	4.383	10.757	0	0	44.996
PLCXD3	-0.304	0.103	-10.756	0	0	44.991
FXYD5	1.746	6.796	10.756	0	0	44.988
TMEM104	0.945	4.26	10.755	0	0	44.981
PPT1	1.197	6.893	10.751	0	0	44.938
ZCWPW2	-0.404	0.445	-10.746	0	0	44.902
FOXF2	1.743	3.282	10.74	0	0	44.842
C14orf119	0.81	5.616	10.739	0	0	44.837
PIK3CD	1.412	4.022	10.737	0	0	44.817
KBTBD13	-0.438	0.074	-10.736	0	0	44.814
MSTN	-0.56	0.171	-10.727	0	0	44.729
TMEM199	0.633	3.539	10.726	0	0	44.721
NMI	1.185	4.942	10.725	0	0	44.716
JPT2	0.956	6.701	10.721	0	0	44.68
COL6A1	2.499	7.895	10.72	0	0	44.67
ASB11	-1.272	0.321	-10.72	0	0	44.67
SNRNP40	0.867	5.132	10.719	0	0	44.661
IDI2	-0.357	0.074	-10.717	0	0	44.647
CORO1C	1.102	6.593	10.717	0	0	44.639
CTSC	1.609	6.201	10.717	0	0	44.639
RHEBL1	1.521	2.421	10.715	0	0	44.621
MAGOHB	1.021	3.221	10.714	0	0	44.62
CACYBP	0.963	5.498	10.708	0	0	44.567
YIF1A	0.971	6.567	10.705	0	0	44.54
COL1A2	3.139	8.449	10.697	0	0	44.465
PRH1	-2.024	0.585	-10.694	0	0	44.443
MMD	1.286	3.526	10.694	0	0	44.44
KAT2A	1.173	5.317	10.693	0	0	44.429
C1orf159	0.871	2.764	10.688	0	0	44.386
ACTL6A	1.469	5.951	10.688	0	0	44.385
SORBS1	-1.645	1.756	-10.686	0	0	44.374
EMP1	-2.019	6.866	-10.686	0	0	44.371
SNRPC	0.902	7.461	10.681	0	0	44.325
SNRPD3	0.784	6.969	10.677	0	0	44.295
DDA1	0.764	4.993	10.673	0	0	44.258
MYO10	1.539	4.699	10.671	0	0	44.24
ITGA6	2.137	8.206	10.671	0	0	44.239
FLYWCH1	0.977	4.1	10.669	0	0	44.225
IFI35	1.814	6.16	10.666	0	0	44.194
OTULIN	0.957	3.872	10.663	0	0	44.168
SEC22A	0.761	3.598	10.661	0	0	44.155
UAP1L1	1.262	3.68	10.661	0	0	44.146
TMEM39B	0.878	4.38	10.658	0	0	44.127
SLC16A7	-1.486	1.531	-10.657	0	0	44.115
KRT17	2.779	12.513	10.657	0	0	44.113
EWSR1	0.742	6.1	10.652	0	0	44.067
PLA2G2A	-3.426	2.482	-10.651	0	0	44.063
RFC2	1.027	5.731	10.648	0	0	44.041
ISG20L2	0.862	5.084	10.647	0	0	44.026
PSMG1	0.965	5.352	10.639	0	0	43.955
ZNF281	1.278	3.78	10.637	0	0	43.936
S100PBP	0.875	2.9	10.636	0	0	43.928
NEIL3	1.401	2.497	10.635	0	0	43.926
GLA	1.086	5.207	10.633	0	0	43.903
NSUN5	0.977	4.795	10.633	0	0	43.901
CAPN5	-1.696	2.609	-10.632	0	0	43.898
PRPS1	1.039	5.666	10.63	0	0	43.881
IGFBP7	1.663	7.987	10.63	0	0	43.88
FANCE	1.296	4.87	10.621	0	0	43.8
KXD1	0.668	5.488	10.615	0	0	43.744
KDELR1	0.764	7.911	10.612	0	0	43.721
PLA2G7	2.003	3.312	10.61	0	0	43.701
KIF26B	1.741	2.322	10.604	0	0	43.65
CD2BP2	0.687	6.014	10.603	0	0	43.643
NEMP1	1.553	3.891	10.601	0	0	43.621
KCNB1	-0.579	0.199	-10.6	0	0	43.619
MINPP1	1.205	4.151	10.598	0	0	43.595
CDK2	1.254	4.939	10.598	0	0	43.595
EXTL1	-1.043	0.351	-10.597	0	0	43.586
PCNA	1.327	8.014	10.594	0	0	43.565
C14orf180	-0.371	0.055	-10.593	0	0	43.551
ADCK5	1.108	4.003	10.591	0	0	43.536
HOXA1	1.428	2.554	10.59	0	0	43.532
FAM167B	1.259	3.118	10.59	0	0	43.529
SLC44A1	1.236	5.469	10.587	0	0	43.499
PSMB7	0.941	8.046	10.586	0	0	43.498
RPN2	0.926	8.574	10.584	0	0	43.476
VRK1	1.153	4.473	10.583	0	0	43.465
SMG5	0.831	6.059	10.579	0	0	43.43
CXCL13	2.936	4.693	10.575	0	0	43.402
C20orf27	1.183	5.686	10.571	0	0	43.359
FAM240C	-1.785	1.041	-10.57	0	0	43.358
LRTM1	-0.809	0.171	-10.567	0	0	43.332
SLC25A32	1.05	4.609	10.566	0	0	43.322
TCFL5	1.039	3.857	10.565	0	0	43.313
DAXX	0.785	6.011	10.565	0	0	43.311
RSRC1	1.237	4.12	10.565	0	0	43.306
P4HA2	1.518	4.983	10.563	0	0	43.29
CHRAC1	0.981	5.374	10.561	0	0	43.276
NMT1	0.77	5.962	10.558	0	0	43.246
ABTB1	1.025	3.824	10.558	0	0	43.245
RGN	-0.853	0.517	-10.553	0	0	43.206
ERCC6L	1.307	2.642	10.552	0	0	43.193
LAMA3	2.667	6.02	10.551	0	0	43.189
PTGES3	0.805	8.058	10.551	0	0	43.187
DCLRE1B	1.133	3.541	10.546	0	0	43.145
LRRC2	-1.557	0.691	-10.546	0	0	43.141
RRP36	0.791	6.068	10.543	0	0	43.122
RPS6KA4	1.16	6.397	10.543	0	0	43.12
WRAP53	0.922	3.349	10.532	0	0	43.022
LRRC8C	1.397	3.042	10.53	0	0	43.009
CAVIN3	1.808	5.117	10.529	0	0	42.999
CDIPT	0.762	6.226	10.527	0	0	42.98
AXIN1	0.845	4.417	10.526	0	0	42.971
PLBD2	1.218	5.771	10.526	0	0	42.968
SLC39A4	1.42	4.086	10.524	0	0	42.957
TMEM63B	0.902	6.021	10.523	0	0	42.944
SIRT6	0.819	4.473	10.515	0	0	42.874
CCDC9	0.736	4.795	10.515	0	0	42.874
STMN1	1.548	6.285	10.513	0	0	42.858
COL5A3	2.145	4.801	10.506	0	0	42.793
KRI1	0.968	5.157	10.505	0	0	42.79
RNF224	-0.967	0.754	-10.501	0	0	42.75
PLAC9	-1.705	2.349	-10.501	0	0	42.749
NAGPA	0.782	3.082	10.494	0	0	42.692
APP	1.44	8.588	10.493	0	0	42.682
DPP3	0.983	5.935	10.492	0	0	42.671
ASPM	1.567	3.391	10.486	0	0	42.626
PTK2	1.122	4.699	10.486	0	0	42.623
DEPTOR	-2.088	2.984	-10.486	0	0	42.619
MCUB	1.154	4.479	10.483	0	0	42.595
CSE1L	0.942	6.899	10.481	0	0	42.583
PCNX3	0.954	5.263	10.481	0	0	42.582
PUS1	0.99	3.969	10.481	0	0	42.581
NREP	1.689	3.814	10.481	0	0	42.576
COL6A3	2.836	5.914	10.48	0	0	42.567
HPGD	-2.219	2.273	-10.479	0	0	42.56
WRAP73	0.987	3.329	10.477	0	0	42.547
SLC25A39	0.778	7.316	10.474	0	0	42.515
HOXA10	1.696	1.831	10.473	0	0	42.513
SNRNP70	0.896	6.555	10.473	0	0	42.512
CAMK2N2	1.338	1.573	10.472	0	0	42.504
ERH	0.94	7.485	10.467	0	0	42.454
SLC5A8	-0.995	0.25	-10.466	0	0	42.447
CDNF	-0.971	1.131	-10.466	0	0	42.446
NDOR1	1.039	4.104	10.465	0	0	42.44
DDX11	1.326	3.199	10.46	0	0	42.4
MASTL	1.215	4.077	10.458	0	0	42.376
CSGALNACT2	1.369	4.331	10.449	0	0	42.298
PHKG2	0.839	3.457	10.448	0	0	42.293
MAP3K11	0.781	4.886	10.447	0	0	42.286
POLE2	1.235	3.045	10.441	0	0	42.234
C1orf112	1.142	2.471	10.441	0	0	42.23
DDOST	0.873	7.994	10.44	0	0	42.225
UMPS	0.965	4.437	10.438	0	0	42.208
ZNF7	0.811	2.753	10.436	0	0	42.187
SNX5	0.842	5.06	10.434	0	0	42.173
TMEM106C	1.13	5.696	10.43	0	0	42.133
EVA1B	1.324	4.34	10.429	0	0	42.126
CHST9	-1.499	0.524	-10.426	0	0	42.102
POC1A	1.178	3.981	10.423	0	0	42.073
YIF1B	0.91	5.224	10.422	0	0	42.065
MTX1	0.695	3.887	10.421	0	0	42.06
PI16	-2.476	1.422	-10.421	0	0	42.055
CDK4	1.119	6.28	10.413	0	0	41.992
MTG2	0.769	4.101	10.409	0	0	41.955
CRTC2	0.769	5.377	10.405	0	0	41.922
BFAR	0.939	5.176	10.399	0	0	41.871
APEX2	0.826	5.464	10.397	0	0	41.853
IRAK1	1.015	7.213	10.395	0	0	41.836
PTBP1	0.792	7.18	10.394	0	0	41.828
ASAP1	1.295	4.328	10.394	0	0	41.827
APLN	1.911	3.108	10.392	0	0	41.812
CENPM	1.535	4.366	10.392	0	0	41.809
TAPBP	1.177	7.56	10.392	0	0	41.807
XPR1	1.38	4.752	10.391	0	0	41.802
LAMB4	-1.046	0.474	-10.39	0	0	41.79
HOXC11	1.529	1.577	10.386	0	0	41.759
SKP2	1.359	4.766	10.383	0	0	41.734
CYP27B1	1.946	2.891	10.377	0	0	41.681
GMPS	1.21	5.227	10.373	0	0	41.642
PRKN	-0.954	0.736	-10.371	0	0	41.625
MARK3	0.905	5.011	10.369	0	0	41.609
ANGPT2	1.389	2.626	10.369	0	0	41.609
TEPSIN	0.883	2.961	10.369	0	0	41.608
TTC31	0.845	3.632	10.367	0	0	41.594
NKAPL	-0.692	0.468	-10.366	0	0	41.587
LAPTM4B	1.407	7.209	10.366	0	0	41.585
TAF1A	1.108	2.661	10.366	0	0	41.581
NT5C1A	-0.986	0.251	-10.361	0	0	41.542
CHST12	0.782	2.246	10.36	0	0	41.536
GOSR2	0.613	3.557	10.359	0	0	41.525
MARK1	1.191	3.8	10.355	0	0	41.488
TOP1MT	1.281	4.495	10.353	0	0	41.471
ZWILCH	1.148	4.009	10.352	0	0	41.467
RFWD3	1.193	4.633	10.351	0	0	41.458
SUMO2	0.724	6.965	10.346	0	0	41.409
MRM2	0.858	5.187	10.345	0	0	41.408
RERGL	-0.69	0.323	-10.34	0	0	41.36
HNRNPL	0.71	6.495	10.339	0	0	41.354
GGH	1.258	5.59	10.334	0	0	41.307
C18orf54	1.153	1.998	10.323	0	0	41.219
CFAP20	0.833	5.206	10.321	0	0	41.195
MBD4	0.969	5.084	10.32	0	0	41.193
SAP30BP	0.674	4.577	10.32	0	0	41.187
B3GNT4	1.072	1.588	10.317	0	0	41.166
LSM4	0.991	6.466	10.31	0	0	41.107
PTDSS1	1.114	5.833	10.307	0	0	41.081
PHLDB2	1.818	4.113	10.306	0	0	41.071
PXN	1.4	5.935	10.306	0	0	41.069
BSG	0.882	8.853	10.303	0	0	41.041
TEAD2	1.556	4.976	10.301	0	0	41.029
LRRC59	0.949	6.996	10.299	0	0	41.012
OSBPL3	1.078	3.97	10.299	0	0	41.008
ZBTB17	0.694	4.429	10.297	0	0	40.993
ZFP41	0.962	2.495	10.295	0	0	40.971
CCT4	0.839	7.796	10.294	0	0	40.966
GRIN2D	2.199	2.516	10.293	0	0	40.96
ENDOU	-2.888	2.403	-10.292	0	0	40.951
SLC4A4	-0.899	0.411	-10.291	0	0	40.941
ACBD6	0.808	3.807	10.291	0	0	40.941
NUDT5	0.893	5.088	10.29	0	0	40.929
NABP2	0.85	5.529	10.289	0	0	40.92
WDR5	0.942	5.851	10.285	0	0	40.892
TOMM40	0.918	6.246	10.284	0	0	40.884
BAK1	1.188	6.321	10.284	0	0	40.878
ALG1	0.765	3.778	10.279	0	0	40.837
MRPL17	0.855	6.131	10.277	0	0	40.818
SHOX2	1.517	1.824	10.276	0	0	40.81
TMEM100	-0.915	0.599	-10.274	0	0	40.798
NASP	1.128	5.298	10.273	0	0	40.785
NAGS	1.337	2.77	10.272	0	0	40.776
LSR	1.31	7.498	10.27	0	0	40.764
FAM111A	1.199	3.838	10.27	0	0	40.757
CALM3	0.813	7.395	10.269	0	0	40.75
WDR75	0.912	4.79	10.265	0	0	40.717
STX2	1.202	3.107	10.263	0	0	40.7
STX4	0.705	5.235	10.257	0	0	40.646
SPG21	0.786	5.858	10.254	0	0	40.623
COL10A1	3.157	3.371	10.253	0	0	40.615
ZNF282	0.835	5.242	10.246	0	0	40.559
FBP2	-1.821	0.806	-10.245	0	0	40.543
HEXB	0.897	5.597	10.243	0	0	40.533
DLGAP4	0.918	5.341	10.243	0	0	40.529
CCT7	0.726	7.929	10.243	0	0	40.527
PROCR	1.872	5.7	10.241	0	0	40.514
MIF	1.229	7.168	10.241	0	0	40.513
ANP32B	0.963	8.286	10.239	0	0	40.495
DUSP14	1.311	6.06	10.239	0	0	40.491
SLC39A1	0.882	6.855	10.236	0	0	40.471
EXOSC2	1.004	4.41	10.235	0	0	40.463
XPO5	0.953	4.784	10.234	0	0	40.455
TELO2	0.899	5.028	10.232	0	0	40.439
MRPS23	0.802	4.309	10.227	0	0	40.388
MCM6	1.357	5.557	10.224	0	0	40.37
PPP2R2D	0.61	3.814	10.222	0	0	40.351
SHC1	1.158	6.864	10.221	0	0	40.344
LGALS3BP	1.324	9.1	10.221	0	0	40.338
KLB	-0.451	0.291	-10.214	0	0	40.284
EDEM2	1.006	5.545	10.214	0	0	40.284
PSMG3	1.11	5.967	10.214	0	0	40.281
EPHB4	1.137	5.985	10.213	0	0	40.27
FAM219A	1.161	4.129	10.21	0	0	40.245
ILF3	0.897	6.201	10.209	0	0	40.238
PKM	0.981	9.614	10.208	0	0	40.231
CBX8	1.015	2.716	10.208	0	0	40.228
CTSA	0.84	6.342	10.206	0	0	40.215
KHDRBS1	0.697	7.123	10.202	0	0	40.178
ZC3H3	0.875	5.008	10.202	0	0	40.176
TARBP2	0.803	4.194	10.201	0	0	40.17
MEN1	0.893	5.051	10.2	0	0	40.163
DMWD	0.755	4.04	10.197	0	0	40.137
FSTL3	2.274	5.097	10.193	0	0	40.104
NAT14	1.542	3.711	10.192	0	0	40.097
LRRC26	-1.372	0.421	-10.192	0	0	40.09
BEX3	1.271	7.621	10.191	0	0	40.088
KDELR2	0.879	7.503	10.189	0	0	40.066
PRB3	-2.524	0.911	-10.187	0	0	40.05
SMPD4	0.956	4.943	10.186	0	0	40.041
TBCB	0.813	5.709	10.177	0	0	39.967
FOXD2	0.712	0.91	10.177	0	0	39.965
POSTN	3.289	6.228	10.17	0	0	39.909
RHOT2	0.833	5.428	10.169	0	0	39.896
RAD54B	0.863	1.4	10.166	0	0	39.876
CD3EAP	0.934	3.021	10.163	0	0	39.847
ALYREF	0.947	7.294	10.163	0	0	39.845
C6orf58	-2.775	0.82	-10.159	0	0	39.81
OASL	2.576	4.7	10.158	0	0	39.806
MUC22	-1.359	0.336	-10.157	0	0	39.792
TPRA1	0.814	5.207	10.156	0	0	39.791
STIL	1.355	2.984	10.156	0	0	39.787
DDX27	0.844	5.332	10.155	0	0	39.783
PTPDC1	0.953	2.28	10.153	0	0	39.761
E4F1	0.741	3.724	10.152	0	0	39.751
SKIV2L	0.759	5.015	10.147	0	0	39.712
DPF1	1.363	1.552	10.146	0	0	39.7
MTHFD2	1.17	5.527	10.145	0	0	39.695
CXorf40B	0.776	4.284	10.144	0	0	39.683
ZDHHC24	0.783	3.511	10.144	0	0	39.683
FADS1	1.896	3.467	10.142	0	0	39.671
ARL6IP1	1.037	7.054	10.142	0	0	39.67
PSMD4	0.757	7.255	10.141	0	0	39.656
TRMU	0.936	3.263	10.14	0	0	39.648
FHOD1	1.062	4.214	10.139	0	0	39.646
SAAL1	0.954	3.657	10.131	0	0	39.578
DENR	0.686	6.15	10.126	0	0	39.532
ANP32E	1.139	5.814	10.126	0	0	39.529
SLC13A2	-1.304	0.432	-10.124	0	0	39.513
PIEZO1	1.156	5.55	10.122	0	0	39.495
UBE2V2	0.857	4.906	10.122	0	0	39.495
TPI1	0.869	9.706	10.118	0	0	39.464
CTNS	0.854	4.02	10.115	0	0	39.436
POFUT1	1.114	5.258	10.113	0	0	39.424
IFI44	2.28	5.916	10.11	0	0	39.4
B4GALT3	0.799	5.062	10.106	0	0	39.367
CNOT3	0.823	4.693	10.106	0	0	39.364
AMZ2	0.76	5.227	10.106	0	0	39.361
RETREG3	0.621	5.7	10.105	0	0	39.355
TTPAL	1.192	4.153	10.102	0	0	39.327
SF3B2	0.825	6.333	10.101	0	0	39.325
SCYL1	0.72	6.21	10.096	0	0	39.282
RRAGC	0.72	4.51	10.096	0	0	39.28
SSRP1	0.92	6.784	10.095	0	0	39.266
KRT32	-1.23	0.715	-10.091	0	0	39.232
PFDN4	0.959	4.717	10.081	0	0	39.155
PLP1	-1.01	0.462	-10.072	0	0	39.08
SSR3	0.873	6.842	10.071	0	0	39.071
NRIP3	1.693	2.301	10.068	0	0	39.042
PDCD5	0.894	6.154	10.067	0	0	39.032
CDH3	1.937	7.717	10.066	0	0	39.029
HDAC1	0.838	7.066	10.064	0	0	39.006
HNRNPC	0.718	7.285	10.06	0	0	38.97
GRB2	0.719	6.586	10.058	0	0	38.957
ZNF114	1.803	1.989	10.055	0	0	38.93
RAB7A	0.808	8.652	10.054	0	0	38.925
GANAB	1.093	8.038	10.053	0	0	38.914
NCAPD2	1.491	5.935	10.043	0	0	38.834
CALU	1.415	6.902	10.043	0	0	38.833
STARD3	0.832	4.925	10.043	0	0	38.827
MFHAS1	1.364	4.675	10.042	0	0	38.823
MKNK1	0.781	3.755	10.039	0	0	38.797
PACRG	-0.822	0.367	-10.039	0	0	38.797
PPIB	0.846	8.408	10.038	0	0	38.79
RBM17	0.805	5.086	10.037	0	0	38.784
GPR89A	0.549	1.384	10.037	0	0	38.779
SYMPK	0.763	4.965	10.035	0	0	38.763
ARHGEF39	1.202	1.997	10.032	0	0	38.742
GTF2E1	0.949	3.917	10.031	0	0	38.726
L3HYPDH	1.122	2.744	10.029	0	0	38.712
CAPN14	-2.809	1.974	-10.028	0	0	38.707
ASB12	-1.133	0.528	-10.028	0	0	38.707
SPNS2	-2.001	3.905	-10.028	0	0	38.702
TCIRG1	1.153	5.543	10.028	0	0	38.701
MAGOH	0.904	5.933	10.022	0	0	38.653
GPN1	0.784	5.287	10.019	0	0	38.626
ITPRID1	-0.429	0.112	-10.018	0	0	38.624
NCF2	1.436	4.851	10.013	0	0	38.58
ARHGEF10L	-1.123	3.818	-10.01	0	0	38.557
SLC10A3	0.841	6.147	10.009	0	0	38.548
JPT1	1.04	7.174	10.009	0	0	38.542
HMGXB3	0.893	4.631	10.009	0	0	38.542
RNF2	0.891	4.225	10.008	0	0	38.537
HGH1	0.929	5.142	10.005	0	0	38.513
TBL1XR1	1.186	5.534	9.999	0	0	38.461
HTRA2	0.737	4.56	9.998	0	0	38.448
LBX2	0.834	0.973	9.997	0	0	38.447
IFI16	1.204	7.144	9.997	0	0	38.444
PKNOX1	0.633	3.219	9.997	0	0	38.44
KHDC1	1.013	1.588	9.988	0	0	38.364
NELFB	0.791	6.747	9.987	0	0	38.36
FAM91A1	1.071	4.982	9.987	0	0	38.36
TSN	0.762	5.925	9.986	0	0	38.352
GPATCH3	0.701	4.635	9.985	0	0	38.341
FANCG	1.307	4.393	9.985	0	0	38.339
NOP56	0.957	6.235	9.982	0	0	38.321
DONSON	1.143	3.658	9.981	0	0	38.313
SMYD2	0.895	4.67	9.981	0	0	38.31
PRCC	0.664	5.907	9.981	0	0	38.309
GPX3	-2.337	5.607	-9.98	0	0	38.305
PAQR4	1.34	4.513	9.978	0	0	38.287
CYHR1	0.89	4.108	9.978	0	0	38.286
VKORC1	1.025	5.02	9.978	0	0	38.285
PERM1	-1.345	2.611	-9.975	0	0	38.255
BID	1.243	4.59	9.972	0	0	38.234
FAM149A	-1.054	0.935	-9.969	0	0	38.212
NID1	2.34	5.034	9.969	0	0	38.205
CCDC14	1.234	2.857	9.968	0	0	38.198
PDE6A	-0.561	0.231	-9.966	0	0	38.185
HOXC6	1.351	1.405	9.966	0	0	38.181
CHPF	1.409	6.964	9.964	0	0	38.165
GOLT1B	1.012	5.247	9.963	0	0	38.154
LSM5	0.879	4.424	9.961	0	0	38.14
DBF4	1.16	3.464	9.96	0	0	38.137
SQLE	1.445	6.384	9.96	0	0	38.135
PRPF31	0.768	5.985	9.96	0	0	38.135
SP100	1.087	4.157	9.958	0	0	38.12
TYMS	1.585	5.17	9.958	0	0	38.117
DOLK	0.828	5.092	9.956	0	0	38.097
KLHL5	1.414	4.387	9.955	0	0	38.092
POLQ	1.309	2.296	9.954	0	0	38.086
EXTL3	0.996	4.343	9.95	0	0	38.053
MED6	0.706	4.134	9.95	0	0	38.052
TRIM65	0.878	4.617	9.948	0	0	38.031
NKIRAS2	0.625	5.084	9.947	0	0	38.026
CBLB	1.182	3.147	9.947	0	0	38.021
CMTR1	0.895	4.967	9.946	0	0	38.016
PDE7A	1.336	3.81	9.943	0	0	37.988
DLK1	-1.451	0.387	-9.936	0	0	37.934
VMA21	0.909	4.997	9.936	0	0	37.93
ELANE	-0.523	0.234	-9.935	0	0	37.925
KLF15	-1.355	0.941	-9.935	0	0	37.922
CA3	-2.908	1.73	-9.934	0	0	37.916
TPD52L2	0.863	6.749	9.933	0	0	37.909
EIF2S2	0.801	7.05	9.933	0	0	37.909
REXO4	0.892	5.481	9.929	0	0	37.875
MIS18A	1.124	4.574	9.925	0	0	37.841
SEM1	1.049	4.78	9.924	0	0	37.83
DNA2	1.154	2.359	9.924	0	0	37.828
GCOM1	-0.742	0.458	-9.921	0	0	37.807
ATP2C1	1.161	5.657	9.92	0	0	37.797
RBM45	0.59	2.635	9.918	0	0	37.777
PRPF4	1.042	5.595	9.916	0	0	37.766
PSMC2	0.799	6.55	9.916	0	0	37.764
PSMA3	0.825	6.432	9.916	0	0	37.763
WDR4	0.901	4.313	9.914	0	0	37.748
SLC36A1	1.081	3.525	9.913	0	0	37.743
BYSL	0.877	5.487	9.913	0	0	37.739
BRCA1	1.251	3.081	9.911	0	0	37.726
ARID3A	1.052	2.669	9.908	0	0	37.7
IQCJ-SCHIP1	1.183	1.807	9.907	0	0	37.69
PPP1R14B	1.005	7.757	9.907	0	0	37.689
NIFK	0.883	5.993	9.906	0	0	37.683
PRPF3	0.84	4.35	9.904	0	0	37.667
RBM19	0.967	4.51	9.903	0	0	37.654
DNMT1	1.331	5.083	9.9	0	0	37.635
SHMT2	1.033	6.41	9.9	0	0	37.629
SLC1A5	1.097	7.542	9.9	0	0	37.629
NR3C2	-1.384	0.879	-9.891	0	0	37.552
FAM92A	1.105	2.699	9.89	0	0	37.543
MRAP	-0.318	0.094	-9.888	0	0	37.528
CYREN	0.898	3.981	9.887	0	0	37.521
PARL	0.989	6.399	9.886	0	0	37.511
ZMYND19	1.013	5.187	9.886	0	0	37.511
PSMA1	0.816	5.958	9.881	0	0	37.473
FOXS1	1.409	2.053	9.881	0	0	37.472
RAD21	1.12	6.839	9.879	0	0	37.453
BANF1	0.958	7.795	9.874	0	0	37.414
ARPC1A	0.847	7.655	9.872	0	0	37.399
SPNS1	0.743	1.689	9.869	0	0	37.369
ENAH	1.359	5.135	9.869	0	0	37.369
ADAMTS12	2.103	2.553	9.869	0	0	37.369
RBP1	2.25	6.06	9.864	0	0	37.332
NAT9	0.966	4.028	9.864	0	0	37.33
MESD	0.668	4.737	9.864	0	0	37.328
FAP	2.16	2.921	9.86	0	0	37.296
ADAMTS7	1.437	2.069	9.859	0	0	37.292
SNAPC1	1.251	4.274	9.859	0	0	37.289
SCAF1	0.754	5.968	9.857	0	0	37.269
HSPA5	0.926	9.283	9.851	0	0	37.22
NFATC2IP	0.807	4.563	9.848	0	0	37.198
NCDN	0.939	4.56	9.846	0	0	37.181
MUS81	0.808	4.035	9.845	0	0	37.176
DDX60L	1.472	3.009	9.845	0	0	37.169
HTN3	-1.719	0.215	-9.843	0	0	37.156
FAM72A	0.658	0.959	9.843	0	0	37.154
SLC25A22	1.105	4.751	9.841	0	0	37.135
TCEAL9	1.089	7.121	9.84	0	0	37.129
ITGB4	1.695	8.366	9.837	0	0	37.104
ACLY	1.093	6.546	9.836	0	0	37.098
GLG1	0.974	5.568	9.834	0	0	37.081
EPSTI1	2.104	4.39	9.831	0	0	37.052
KNL1	1.298	2.736	9.83	0	0	37.047
STX16	0.85	5.03	9.829	0	0	37.035
ACADL	-0.776	0.362	-9.825	0	0	37.007
NSUN2	0.992	5.796	9.822	0	0	36.982
SMTN	1.327	4.524	9.822	0	0	36.979
NOC4L	0.817	5.39	9.82	0	0	36.965
COL6A2	2.291	8.142	9.82	0	0	36.964
NSMCE2	0.803	4.424	9.82	0	0	36.963
EXOC3L2	1.084	2.662	9.818	0	0	36.95
SNRPG	0.944	6.178	9.816	0	0	36.935
NME5	-0.738	0.274	-9.815	0	0	36.923
GNGT1	1.391	1.481	9.814	0	0	36.911
LAMC1	1.509	6.272	9.812	0	0	36.899
GINS3	0.955	3.189	9.81	0	0	36.884
UBE2Q1	0.747	5.827	9.81	0	0	36.878
TMC7	1.135	1.803	9.807	0	0	36.857
ABCD1	1.292	3.813	9.807	0	0	36.853
SET	0.896	7.972	9.802	0	0	36.814
AHSA1	0.852	6.844	9.8	0	0	36.8
KMT5C	1.016	2.734	9.799	0	0	36.794
PDRG1	0.969	5.048	9.797	0	0	36.777
DIAPH3	1.16	2.638	9.796	0	0	36.764
PCSK9	2.491	4.032	9.796	0	0	36.761
RNF149	0.733	5.644	9.795	0	0	36.753
CEACAM1	-2.218	3.42	-9.792	0	0	36.734
UBTD2	0.913	4.672	9.792	0	0	36.732
CADM2	-0.391	0.146	-9.792	0	0	36.729
GMEB2	0.779	4.33	9.79	0	0	36.714
TAF5	0.815	2.817	9.789	0	0	36.707
CHRDL1	-2.077	1.316	-9.789	0	0	36.705
MAZ	1.047	5.642	9.788	0	0	36.702
METTL5	0.762	4.861	9.787	0	0	36.694
SASH1	-1.663	3.454	-9.787	0	0	36.691
XRCC4	0.917	3.458	9.786	0	0	36.682
SNRPB2	0.827	5.699	9.782	0	0	36.646
CLCNKB	-0.982	0.302	-9.779	0	0	36.628
CEP72	1.146	2.653	9.777	0	0	36.605
MRPS34	0.771	7.54	9.776	0	0	36.601
HMCES	0.959	6.51	9.775	0	0	36.594
TTC9C	0.828	4.02	9.775	0	0	36.591
TAF11	0.737	5.804	9.774	0	0	36.583
PAK2	1.104	6.189	9.769	0	0	36.539
CCDC77	1.052	3.183	9.765	0	0	36.512
KRTCAP2	0.79	3.619	9.765	0	0	36.508
TREH	-0.436	0.179	-9.764	0	0	36.5
CNPY4	1.219	3.643	9.762	0	0	36.486
MSTO1	0.796	2.942	9.761	0	0	36.476
PGS1	0.88	3.951	9.76	0	0	36.465
AL441992.2	1.239	3.748	9.759	0	0	36.46
SURF4	0.793	7.971	9.759	0	0	36.459
SAMD5	-1.521	1.275	-9.758	0	0	36.454
ANXA5	1.112	7.983	9.754	0	0	36.417
TNFRSF10B	1.321	5.345	9.753	0	0	36.411
LRWD1	0.872	3.616	9.753	0	0	36.409
MYDGF	0.933	7.038	9.752	0	0	36.403
MMP3	3.664	5.656	9.751	0	0	36.397
TENT4A	1.007	4.496	9.751	0	0	36.389
PPARG	-1.556	1.442	-9.748	0	0	36.37
SFXN1	0.951	4.528	9.748	0	0	36.365
GRINA	1.012	7.71	9.746	0	0	36.353
COMMD4	0.925	4.491	9.742	0	0	36.32
TMEM210	-0.34	0.075	-9.737	0	0	36.275
COASY	0.66	6.187	9.736	0	0	36.265
CHST15	1.445	4.453	9.735	0	0	36.257
TAP1	1.692	7.338	9.732	0	0	36.235
CYP3A5	-1.447	1.127	-9.729	0	0	36.212
WDYHV1	0.899	4.136	9.727	0	0	36.194
DAPK3	0.92	5.834	9.726	0	0	36.19
GEMIN2	0.922	3.478	9.723	0	0	36.166
AAR2	0.814	5.548	9.718	0	0	36.121
PPARGC1A	-1.258	0.863	-9.718	0	0	36.118
TM4SF19	2.006	2.821	9.715	0	0	36.095
FN3KRP	0.869	5.336	9.715	0	0	36.093
SGO2	1.175	2.788	9.714	0	0	36.083
LUM	2.423	7.6	9.713	0	0	36.079
DTX3L	1.314	5.959	9.712	0	0	36.072
DDX41	0.625	5.543	9.711	0	0	36.065
U2SURP	1.073	4.819	9.71	0	0	36.053
GSK3A	0.616	5.71	9.709	0	0	36.045
FJX1	1.482	4.59	9.704	0	0	36.007
R3HCC1L	0.778	3.925	9.704	0	0	36.005
APMAP	1.167	7.054	9.702	0	0	35.992
METTL26	0.964	5.766	9.702	0	0	35.988
MB21D2	1.261	3.437	9.701	0	0	35.983
C19orf48	1.196	5.859	9.701	0	0	35.977
POMT2	0.831	2.862	9.7	0	0	35.969
GPX8	1.49	4.059	9.699	0	0	35.967
TLE2	-1.828	2.541	-9.699	0	0	35.964
YTHDF1	0.71	6.051	9.699	0	0	35.964
SF3B6	0.753	7.318	9.699	0	0	35.962
EXOSC4	1.091	6.063	9.697	0	0	35.946
SLC11A1	1.277	1.907	9.696	0	0	35.942
GSDMD	1.226	5.404	9.696	0	0	35.941
KRT33A	-1.127	0.604	-9.696	0	0	35.935
PRB4	-1.345	0.221	-9.695	0	0	35.931
MINDY1	-0.986	3.724	-9.693	0	0	35.918
DNASE2	1.089	6.099	9.689	0	0	35.884
U2AF2	0.786	6.984	9.689	0	0	35.884
BRIX1	0.998	4.679	9.688	0	0	35.87
PTPN12	1.097	5.803	9.687	0	0	35.862
SCNN1B	-2.48	3.119	-9.683	0	0	35.832
C4orf48	1.653	3.352	9.68	0	0	35.806
STON2	1.466	4.677	9.676	0	0	35.777
STRIT1	-2.391	0.924	-9.675	0	0	35.767
UNC119	0.941	3.908	9.674	0	0	35.759
MAD1L1	0.968	4.137	9.674	0	0	35.759
RBCK1	0.853	6.052	9.671	0	0	35.734
PXDN	2.224	4.475	9.671	0	0	35.731
ERP44	0.675	5.85	9.668	0	0	35.713
ATP6V0B	0.769	6.671	9.667	0	0	35.701
DRAP1	0.941	7.63	9.666	0	0	35.689
SLC25A1	0.899	6.799	9.665	0	0	35.683
PSMA5	0.739	5.789	9.663	0	0	35.668
SVBP	0.868	4.737	9.662	0	0	35.661
TIPIN	0.909	3.223	9.66	0	0	35.646
LY6E	1.641	8.822	9.66	0	0	35.645
LZTR1	0.909	4.141	9.658	0	0	35.624
MGLL	-1.617	4.389	-9.655	0	0	35.599
KLHL33	-0.91	0.295	-9.654	0	0	35.59
SPOCD1	1.437	1.624	9.651	0	0	35.571
TIMM17A	0.666	5.487	9.651	0	0	35.566
NLRC5	1.423	4.042	9.65	0	0	35.56
TMEM44	1.369	3.51	9.647	0	0	35.534
LDHD	-1.667	2.827	-9.645	0	0	35.516
ULK1	1.019	4.935	9.644	0	0	35.513
CXCR2	-1.792	1.918	-9.643	0	0	35.505
GJB1	-1.181	0.416	-9.643	0	0	35.5
CDK5RAP1	0.811	4.122	9.64	0	0	35.479
RNF34	0.776	4.236	9.638	0	0	35.465
CHEK2	1.114	3.479	9.636	0	0	35.447
CHAF1A	1.246	4.73	9.636	0	0	35.444
SNF8	0.756	5.022	9.631	0	0	35.407
GPR153	1.581	5.173	9.631	0	0	35.404
COPZ1	0.556	6.802	9.628	0	0	35.382
IRF9	1.143	2.198	9.627	0	0	35.37
HSPB6	-3.197	3.142	-9.625	0	0	35.353
FAM72B	0.828	1.216	9.62	0	0	35.315
PLEKHG2	1.035	3.429	9.619	0	0	35.305
TBL2	0.805	4.734	9.612	0	0	35.251
NCAPG2	1.291	3.925	9.611	0	0	35.243
RNF220	0.656	4.296	9.611	0	0	35.239
MRPL9	0.685	6.105	9.61	0	0	35.237
PPIL1	0.836	6.016	9.61	0	0	35.234
TSPAN9	1.148	5.425	9.609	0	0	35.224
SEPTIN9	0.917	6.526	9.607	0	0	35.212
C7	-1.784	0.898	-9.606	0	0	35.198
FN1	3.174	7.075	9.604	0	0	35.187
CNPY3	1.093	6.555	9.604	0	0	35.186
RFC5	1.2	4.401	9.604	0	0	35.181
ITM2A	-1.766	3.417	-9.603	0	0	35.176
ZNF844	-1.176	1.398	-9.602	0	0	35.171
C15orf62	-1.72	2.582	-9.601	0	0	35.163
MICB	1.637	3.179	9.6	0	0	35.152
AQP5	-3.09	1.827	-9.6	0	0	35.152
CA6	-1.363	0.354	-9.598	0	0	35.134
FBLIM1	1.452	6.161	9.596	0	0	35.117
RPS6KA1	1.024	5.435	9.596	0	0	35.115
ITGA1	1.334	2.513	9.595	0	0	35.111
SRGAP2	0.905	2.873	9.593	0	0	35.097
PRR4	-2.791	1.173	-9.591	0	0	35.081
CHRM1	-1.051	0.298	-9.589	0	0	35.059
SMARCB1	0.809	6.718	9.588	0	0	35.052
ITPK1	0.927	4.86	9.584	0	0	35.022
FAM89A	1.474	4.944	9.583	0	0	35.015
RBMX2	0.718	4.613	9.582	0	0	35.007
CENPW	1.432	6.306	9.582	0	0	35.004
LIMD2	1.443	3.446	9.579	0	0	34.979
DNTTIP1	0.779	5.539	9.579	0	0	34.977
SFPQ	0.729	6.775	9.578	0	0	34.972
PARP2	0.953	4.012	9.576	0	0	34.954
CAMKK2	0.768	4.721	9.575	0	0	34.95
MICAL2	1.691	3.53	9.575	0	0	34.946
BRD9	0.845	3.693	9.573	0	0	34.935
TSPAN17	0.816	5.129	9.571	0	0	34.917
LMAN2L	0.944	4.773	9.57	0	0	34.906
PRNP	1.36	8.444	9.57	0	0	34.903
C6orf141	1.847	2.855	9.568	0	0	34.893
TRMT61A	0.96	4.715	9.566	0	0	34.878
ATG101	0.706	4.974	9.564	0	0	34.861
SNAP47	0.767	3.915	9.563	0	0	34.853
PRR13	0.672	5.84	9.561	0	0	34.834
CKMT2	-2.42	1.524	-9.561	0	0	34.83
ITGA3	1.887	6.923	9.559	0	0	34.818
APBA2	1.485	1.913	9.555	0	0	34.784
SFR1	1.06	3.729	9.554	0	0	34.777
FAM32A	0.591	6.91	9.553	0	0	34.767
PPP2R5D	0.753	5.806	9.552	0	0	34.76
BCL2L15	-0.874	0.428	-9.552	0	0	34.759
FAM166B	-1.001	0.824	-9.552	0	0	34.757
EPHB2	1.739	2.724	9.551	0	0	34.749
SEC14L5	-0.769	0.501	-9.546	0	0	34.712
MMP13	4.221	4.763	9.546	0	0	34.708
GATC	0.698	3.923	9.543	0	0	34.688
BAIAP2L1	1.022	5.462	9.542	0	0	34.682
ZNF335	0.675	3.641	9.542	0	0	34.679
C8orf76	0.781	3.51	9.541	0	0	34.673
TPST1	1.462	4.456	9.536	0	0	34.632
LRRC8D	1.246	4.863	9.535	0	0	34.618
SUGCT	1.594	2.941	9.535	0	0	34.618
FLNA	1.442	8.633	9.533	0	0	34.609
NTMT1	0.866	4.631	9.53	0	0	34.581
FANCC	1.064	2.734	9.528	0	0	34.561
TXNDC9	0.728	5.217	9.527	0	0	34.557
TMEM81	0.837	2.469	9.526	0	0	34.546
PHF19	1.113	3.998	9.522	0	0	34.519
HTRA3	2.308	5.071	9.522	0	0	34.512
PPP1R35	1.04	5.022	9.52	0	0	34.499
HLA-A	1.416	10.497	9.519	0	0	34.492
ZDHHC12	0.939	6.054	9.519	0	0	34.49
GPT2	-1.363	4.5	-9.517	0	0	34.477
THOC6	0.846	5.838	9.517	0	0	34.476
FAM110A	0.933	5.358	9.517	0	0	34.474
CSNK2A2	0.781	5.172	9.516	0	0	34.467
INTS7	0.88	4.239	9.516	0	0	34.464
TIMMDC1	0.748	6.289	9.514	0	0	34.449
NOMO1	0.878	4.669	9.513	0	0	34.443
TMEM208	0.82	5.903	9.51	0	0	34.419
TNK2	0.971	4.291	9.509	0	0	34.411
PNMA1	1.205	5.203	9.507	0	0	34.391
MEA1	0.794	7.295	9.506	0	0	34.384
KRTAP13-1	-0.798	0.095	-9.505	0	0	34.375
TRAIP	1.064	2.669	9.504	0	0	34.37
ADH5	0.93	6.259	9.504	0	0	34.366
CLSTN1	1.193	8.042	9.503	0	0	34.364
GSTO1	1.028	7.589	9.502	0	0	34.355
OSTC	0.814	7.078	9.501	0	0	34.347
NUP107	1.089	4.057	9.494	0	0	34.29
BORA	1.248	2.946	9.494	0	0	34.287
TOR1B	0.879	5.048	9.491	0	0	34.267
RPL26L1	0.772	5.512	9.488	0	0	34.243
MITD1	0.809	3.356	9.488	0	0	34.243
CAD	1.143	4.909	9.484	0	0	34.212
VIP	-0.629	0.267	-9.478	0	0	34.156
PITPNB	0.783	5.933	9.478	0	0	34.155
PNPLA7	-0.829	0.94	-9.477	0	0	34.152
HOXC4	1.323	1.625	9.473	0	0	34.12
NPY1R	-0.748	0.338	-9.473	0	0	34.116
ERAL1	0.68	6.146	9.472	0	0	34.111
SDF2	0.644	5.106	9.472	0	0	34.11
PSMB5	0.741	7.854	9.472	0	0	34.108
EDC3	0.639	4.48	9.468	0	0	34.076
PEG3	-1.015	0.528	-9.467	0	0	34.072
PSMD10	0.802	5.817	9.466	0	0	34.06
KRT36	-2.075	0.585	-9.465	0	0	34.052
CPNE1	1.188	6.772	9.462	0	0	34.03
CEP57L1	0.7	1.979	9.462	0	0	34.029
SENP3	0.736	4.418	9.461	0	0	34.025
SIPA1	0.953	4.731	9.461	0	0	34.019
ADAM10	1.02	4.467	9.458	0	0	33.999
ADAMTS14	1.525	2.338	9.456	0	0	33.982
KRTAP3-3	-0.806	0.091	-9.454	0	0	33.965
FMNL2	1.32	4.706	9.449	0	0	33.926
RFLNB	1.433	4.164	9.448	0	0	33.919
GADL1	-0.339	0.093	-9.447	0	0	33.91
AAGAB	0.744	5.521	9.444	0	0	33.881
HNRNPA2B1	0.796	8.098	9.438	0	0	33.834
NIT1	0.586	4.416	9.437	0	0	33.83
PGP	0.814	4.355	9.436	0	0	33.82
CCDC137	0.849	5.572	9.432	0	0	33.79
C10orf88	0.666	3.054	9.431	0	0	33.78
DPY30	0.694	5.106	9.43	0	0	33.769
NMRAL1	0.784	5.19	9.427	0	0	33.747
FKBP10	2.273	5.321	9.426	0	0	33.739
UBE2M	0.674	6.831	9.426	0	0	33.738
FIBP	0.808	5.664	9.424	0	0	33.725
KCTD5	0.763	5.716	9.421	0	0	33.7
HSPB11	0.894	4.109	9.42	0	0	33.693
FABP7	-1.153	0.42	-9.417	0	0	33.67
KRTAP3-2	-1.016	0.209	-9.416	0	0	33.655
CLCA4	-3.272	3.34	-9.415	0	0	33.65
BLM	1.117	2.568	9.414	0	0	33.645
CTSZ	1.375	7.815	9.414	0	0	33.644
GPATCH2	0.83	2.796	9.412	0	0	33.623
OAS2	1.984	6.068	9.41	0	0	33.606
ENY2	0.83	4.478	9.407	0	0	33.583
GSS	0.811	6.864	9.404	0	0	33.563
SRM	0.853	7.078	9.404	0	0	33.563
F11R	1.034	7.03	9.403	0	0	33.551
SIVA1	0.947	5.144	9.403	0	0	33.549
RALY	0.852	6.179	9.402	0	0	33.549
MPO	-0.784	0.355	-9.401	0	0	33.541
PLEKHA8	0.744	2.4	9.401	0	0	33.538
UTP18	0.758	5.491	9.401	0	0	33.534
HTRA1	1.828	7.387	9.4	0	0	33.532
MYO19	0.913	4.01	9.399	0	0	33.523
XXYLT1	1.177	4.359	9.398	0	0	33.515
BCAP31	0.789	8.48	9.398	0	0	33.513
C10orf55	1.107	1.818	9.395	0	0	33.493
APOL1	2.171	7.723	9.395	0	0	33.492
ABCF3	0.828	5.542	9.395	0	0	33.492
BANP	0.622	2.361	9.395	0	0	33.491
TUBB3	1.411	2.096	9.392	0	0	33.463
TRIT1	0.869	4.674	9.391	0	0	33.46
FAM189B	0.839	4.855	9.391	0	0	33.453
MRPL28	0.838	6.459	9.39	0	0	33.448
LCLAT1	0.94	3.264	9.389	0	0	33.439
SLC8B1	0.727	4.277	9.387	0	0	33.422
UBXN7	1.193	4.241	9.387	0	0	33.422
MRTFA	0.862	4.863	9.385	0	0	33.409
MRTO4	0.802	6.07	9.383	0	0	33.393
TUBG2	0.959	3.648	9.383	0	0	33.393
CPOX	0.981	4.55	9.383	0	0	33.391
C12orf75	1.704	5.212	9.381	0	0	33.379
COX7A1	-2.072	3.857	-9.381	0	0	33.377
UBL3	-1.08	4.525	-9.38	0	0	33.371
GLMP	0.902	5	9.38	0	0	33.365
INO80E	0.661	4.012	9.379	0	0	33.363
OAS3	1.932	6.004	9.378	0	0	33.35
TNFAIP8	0.919	3.723	9.374	0	0	33.324
FEZ1	1.902	3.714	9.373	0	0	33.316
PRKRIP1	0.805	4.279	9.373	0	0	33.31
FPGS	0.937	5.597	9.37	0	0	33.29
ACTR5	0.776	3.914	9.368	0	0	33.275
C8orf33	0.824	5.569	9.366	0	0	33.255
CBX1	1.087	6.114	9.362	0	0	33.222
ABRA	-1.367	0.466	-9.36	0	0	33.209
LSMEM2	-0.5	0.201	-9.359	0	0	33.201
BARX2	-2.254	4.263	-9.357	0	0	33.185
BNC1	1.985	5.797	9.357	0	0	33.183
SMG7	0.882	5.355	9.353	0	0	33.15
TNFAIP1	0.803	6.724	9.353	0	0	33.148
SH3BP1	0.992	5.308	9.352	0	0	33.145
FERMT1	1.682	5.97	9.352	0	0	33.143
MRPS12	0.845	5.923	9.351	0	0	33.138
GDF10	-1.198	0.695	-9.35	0	0	33.124
ANKRD13D	0.877	4.337	9.343	0	0	33.073
CDR2	1.082	3.885	9.341	0	0	33.054
FBXO5	1.141	3.292	9.34	0	0	33.05
ZNF697	1.106	2.443	9.338	0	0	33.033
SNRPD1	0.898	5.14	9.336	0	0	33.013
SKIL	1.228	4.744	9.335	0	0	33.004
SRSF9	0.747	6.172	9.328	0	0	32.955
GPN2	0.617	4.071	9.328	0	0	32.95
POT1	0.904	3.24	9.327	0	0	32.945
SLC12A9	0.843	3.914	9.327	0	0	32.943
HEXA	0.927	3.698	9.326	0	0	32.939
B3GNT9	1.235	4.177	9.325	0	0	32.931
GPR4	1.143	2.594	9.323	0	0	32.907
CENPH	1.272	4.101	9.322	0	0	32.904
AMPD2	0.856	4.076	9.319	0	0	32.879
HACD3	1.051	5.084	9.316	0	0	32.858
PLXND1	1.344	4.425	9.314	0	0	32.841
PPP1R3A	-1.399	0.465	-9.312	0	0	32.821
FKBP14	1.183	3.724	9.312	0	0	32.821
FZD6	1.418	6.181	9.311	0	0	32.817
ZNF696	0.894	2.583	9.31	0	0	32.806
ARMC1	0.866	5.291	9.309	0	0	32.802
HTN1	-1.438	0.181	-9.309	0	0	32.797
MCM3	1.211	6.579	9.308	0	0	32.792
ICAM5	1.411	1.701	9.306	0	0	32.773
FHIT	-0.709	0.798	-9.304	0	0	32.757
HERC5	1.765	3.33	9.303	0	0	32.751
MED22	0.822	3.925	9.303	0	0	32.751
BPIFA2	-1.532	0.241	-9.299	0	0	32.717
ZNRD2	0.897	5.283	9.298	0	0	32.714
SNW1	0.736	6.493	9.297	0	0	32.707
TUBA1C	1.023	7.701	9.296	0	0	32.692
CLYBL	-0.812	1.355	-9.296	0	0	32.692
PPIH	0.937	5.689	9.294	0	0	32.679
NOP2	1.002	5.405	9.294	0	0	32.678
ASPHD2	1.116	2.872	9.292	0	0	32.661
PPP1R9B	0.855	6.155	9.288	0	0	32.629
JAG1	1.435	6.755	9.287	0	0	32.621
CRELD2	0.846	4.686	9.286	0	0	32.616
ZDHHC8	1.001	4.565	9.282	0	0	32.586
TMEM39A	1.013	4.211	9.282	0	0	32.583
TCEAL2	-1.343	0.737	-9.278	0	0	32.552
FAM72D	0.637	0.853	9.276	0	0	32.538
APOBEC3B	1.99	4.651	9.276	0	0	32.537
BRF1	0.589	2.131	9.275	0	0	32.524
TUT1	0.743	3.212	9.27	0	0	32.487
PBK	1.457	4.331	9.269	0	0	32.481
TIGD5	0.887	3.612	9.268	0	0	32.47
SLC16A3	1.385	5.018	9.265	0	0	32.447
ZGRF1	0.841	1.473	9.264	0	0	32.438
KATNA1	0.677	4.741	9.263	0	0	32.428
MUC15	-2.294	2.751	-9.262	0	0	32.427
MDC1	1.064	3.838	9.261	0	0	32.416
EHD2	1.304	7.234	9.26	0	0	32.407
ATP13A4	-2.098	1.756	-9.259	0	0	32.401
ABHD15	0.907	3.851	9.259	0	0	32.398
OPRPN	-0.774	0.087	-9.258	0	0	32.396
TNXB	-1.524	1.229	-9.256	0	0	32.375
NEMP2	0.951	2.469	9.256	0	0	32.373
FBXO7	0.671	4.971	9.252	0	0	32.343
NDC1	0.97	4.712	9.248	0	0	32.316
ORC5	0.816	4.052	9.246	0	0	32.298
AOX1	-1.379	1.454	-9.244	0	0	32.281
LAMA5	1.188	5.496	9.242	0	0	32.267
CAPG	0.938	7.962	9.241	0	0	32.261
HNRNPM	0.7	7.186	9.239	0	0	32.243
POLE	1	3.306	9.238	0	0	32.234
ELOF1	0.61	5.155	9.236	0	0	32.217
TBPL1	0.776	3.376	9.235	0	0	32.211
LOXL3	1.12	2.071	9.235	0	0	32.211
RAD9A	0.954	3.758	9.234	0	0	32.204
ASB15	-0.882	0.254	-9.234	0	0	32.203
TNIP2	0.745	5.633	9.23	0	0	32.168
UBE2L6	1.516	7.41	9.228	0	0	32.155
WDR24	0.693	3.722	9.227	0	0	32.142
GATAD2A	0.738	5.508	9.224	0	0	32.122
FRMD8	0.994	6.093	9.22	0	0	32.092
CAPN6	-1.775	0.974	-9.22	0	0	32.088
LAS1L	0.75	4.777	9.219	0	0	32.082
GREM1	2.075	3.143	9.217	0	0	32.062
SPATA33	0.785	2.111	9.216	0	0	32.06
NOL7	0.686	6.086	9.216	0	0	32.056
PAICS	0.988	5.819	9.212	0	0	32.029
KRT78	-3.523	4.119	-9.212	0	0	32.023
GNB1L	0.888	2.485	9.211	0	0	32.017
ATP2B2	-0.711	0.245	-9.211	0	0	32.017
TLK2	0.642	3.594	9.209	0	0	32.002
MET	1.519	5.279	9.207	0	0	31.987
RNASEH1	0.725	4.361	9.206	0	0	31.979
PABPN1	0.851	5.804	9.203	0	0	31.959
PRPSAP2	0.823	4.219	9.203	0	0	31.953
EXT2	1.124	5.918	9.201	0	0	31.941
HELZ2	1.44	4.643	9.199	0	0	31.922
RBM28	0.754	2.874	9.198	0	0	31.917
ZDHHC15	-0.625	0.369	-9.197	0	0	31.907
HPS4	0.79	3.543	9.197	0	0	31.905
RNF215	0.816	1.906	9.196	0	0	31.903
ANXA9	-1.727	3.199	-9.196	0	0	31.902
RAB29	1.03	4.094	9.196	0	0	31.902
ART1	-0.827	0.233	-9.193	0	0	31.875
DUSP9	2.026	2.621	9.193	0	0	31.874
THEMIS2	1.336	3.867	9.192	0	0	31.871
NFIX	-1.359	5.062	-9.192	0	0	31.865
CDC27	0.793	4.894	9.19	0	0	31.852
CFD	-1.725	4.83	-9.187	0	0	31.827
BCAS4	1.232	2.117	9.186	0	0	31.824
CHAD	-1.215	0.812	-9.186	0	0	31.822
XRCC6	0.675	8.471	9.186	0	0	31.822
PSMD13	0.763	6.464	9.185	0	0	31.812
GALNT16	-0.873	0.492	-9.185	0	0	31.812
C17orf67	0.726	1.403	9.185	0	0	31.809
YY1	0.746	5.428	9.185	0	0	31.809
SUPT16H	0.969	5.954	9.183	0	0	31.798
SEC61B	0.67	7.545	9.182	0	0	31.788
TSEN34	0.754	5.432	9.181	0	0	31.783
GLS	1.187	4.518	9.18	0	0	31.772
SNRPF	0.894	5.582	9.18	0	0	31.771
EXOSC9	0.783	4.065	9.18	0	0	31.77
CENPT	0.863	3.99	9.18	0	0	31.77
HLA-B	1.552	10.942	9.178	0	0	31.76
DPF2	0.782	4.325	9.178	0	0	31.756
POLE4	0.837	5.557	9.177	0	0	31.75
VIRMA	0.826	4.326	9.174	0	0	31.724
NUDC	0.785	7.012	9.174	0	0	31.723
GALNT10	1.136	3.832	9.173	0	0	31.716
USP18	1.68	3.931	9.172	0	0	31.707
MPC1	-0.966	5.046	-9.169	0	0	31.685
GIT1	0.895	5.735	9.168	0	0	31.682
NUP155	1.068	4.141	9.168	0	0	31.674
PCYT1A	0.918	5.593	9.166	0	0	31.663
PI4K2A	0.754	5.164	9.165	0	0	31.655
RABEPK	0.778	4.442	9.164	0	0	31.648
PYCR2	1.003	5.599	9.164	0	0	31.646
MAP1LC3C	-0.775	0.573	-9.162	0	0	31.632
C9orf78	0.682	5.337	9.159	0	0	31.608
TNFRSF25	1.302	3.535	9.158	0	0	31.602
DVL3	1.219	6.111	9.158	0	0	31.596
VOPP1	1.335	4.664	9.157	0	0	31.592
CEP164	0.807	3.041	9.157	0	0	31.588
LTBR	0.832	6.387	9.155	0	0	31.576
EMP3	1.486	6.018	9.153	0	0	31.557
FADD	1.681	5.006	9.151	0	0	31.547
OAZ1	0.638	8.79	9.15	0	0	31.535
RGS3	0.912	3.284	9.149	0	0	31.526
NOL10	0.682	5.036	9.146	0	0	31.505
CEACAM7	-2.728	1.946	-9.144	0	0	31.488
DCBLD2	1.548	3.947	9.144	0	0	31.487
C1orf35	0.838	3.848	9.144	0	0	31.486
TEX10	0.795	3.989	9.141	0	0	31.467
PSMC3	0.716	7.67	9.141	0	0	31.467
NRSN2	1.308	4.687	9.141	0	0	31.464
HMGA2	2.093	2.24	9.141	0	0	31.463
TAF1C	0.844	4.129	9.14	0	0	31.458
ATAD3A	0.884	5.257	9.14	0	0	31.456
PDZD11	0.652	6.343	9.14	0	0	31.456
PML	1.179	5.312	9.139	0	0	31.452
STAT1	1.731	7.583	9.137	0	0	31.43
SEMA7A	1.344	3.596	9.135	0	0	31.419
UBE2A	0.659	5.548	9.135	0	0	31.418
MMS22L	0.875	1.749	9.135	0	0	31.417
NELL2	2.66	4.025	9.134	0	0	31.412
FZR1	0.729	5.279	9.132	0	0	31.396
NAIF1	0.607	3.412	9.132	0	0	31.392
ATG12	0.644	3.567	9.131	0	0	31.384
SLBP	0.877	6.276	9.13	0	0	31.38
MPP3	1.053	2.063	9.128	0	0	31.365
SFSWAP	0.635	3.718	9.128	0	0	31.362
BGN	2.126	8.564	9.128	0	0	31.359
DDIAS	1.166	2.76	9.127	0	0	31.354
ATP13A2	0.875	5.461	9.127	0	0	31.353
TRIM59	1.151	2.409	9.127	0	0	31.352
TANGO2	0.725	3.353	9.125	0	0	31.336
C2orf88	-0.791	0.826	-9.124	0	0	31.334
CNOT9	0.799	5.211	9.119	0	0	31.291
TMEM259	0.716	6.42	9.119	0	0	31.29
PTPN2	0.857	4.224	9.118	0	0	31.28
EIF5A	0.735	9.38	9.117	0	0	31.274
DUSP12	0.818	4.447	9.117	0	0	31.274
EXOSC1	0.613	4.302	9.117	0	0	31.272
DKC1	0.936	6.231	9.116	0	0	31.265
PELO	0.712	4.383	9.115	0	0	31.261
RBL1	1.056	3.32	9.113	0	0	31.245
COPS5	0.665	4.659	9.111	0	0	31.232
S100A1	-2.349	2.365	-9.111	0	0	31.23
SLC39A7	0.839	7.312	9.11	0	0	31.221
FLCN	0.726	3.096	9.11	0	0	31.217
PIAS4	0.709	4.49	9.109	0	0	31.214
RNF114	0.745	5.602	9.105	0	0	31.18
ZNF623	0.927	3.783	9.104	0	0	31.176
WIPI2	0.582	4.903	9.104	0	0	31.17
SIGMAR1	1.117	6.795	9.101	0	0	31.151
TRMT1	0.844	5.04	9.1	0	0	31.139
DPH7	0.989	3.58	9.099	0	0	31.131
PDGFRB	1.943	5.165	9.098	0	0	31.129
SUPT5H	0.621	5.849	9.093	0	0	31.085
THOC5	0.76	3.68	9.092	0	0	31.081
SAR1A	0.572	5.595	9.092	0	0	31.081
TM2D2	0.866	4.803	9.092	0	0	31.079
ANKZF1	0.826	3.867	9.09	0	0	31.063
TOX2	1.715	3.003	9.085	0	0	31.02
C9orf135	-0.749	0.16	-9.082	0	0	30.998
PSMB9	1.748	5.989	9.082	0	0	30.997
SELENOT	0.865	6.158	9.08	0	0	30.984
HPCAL1	0.809	3.969	9.079	0	0	30.979
AMOT	-1.896	1.784	-9.079	0	0	30.979
RNF7	0.832	6.206	9.079	0	0	30.978
SPP1	3.305	6.324	9.076	0	0	30.953
MCM8	1.142	2.977	9.076	0	0	30.952
MSH6	1.091	4.309	9.074	0	0	30.937
HLF	-1.938	1.925	-9.074	0	0	30.936
DENND1A	0.778	3.365	9.073	0	0	30.928
INTS13	0.85	4.981	9.072	0	0	30.925
RIC8A	0.806	5.777	9.069	0	0	30.896
RBM15	0.706	3.384	9.067	0	0	30.883
F10	-0.958	1.048	-9.064	0	0	30.861
B3GALT6	0.94	4.8	9.063	0	0	30.855
RCCD1	0.946	3.174	9.063	0	0	30.851
ASCL3	-0.81	0.205	-9.063	0	0	30.85
PGM5	-1.12	0.981	-9.061	0	0	30.839
ATG13	0.714	5.251	9.061	0	0	30.834
RBM42	0.739	6.867	9.06	0	0	30.831
CHST7	1.551	3.167	9.06	0	0	30.826
AJUBA	1.372	5.273	9.056	0	0	30.799
CRIPT	0.663	4.363	9.056	0	0	30.799
PDGFA	1.339	4.219	9.056	0	0	30.797
RIOX1	0.819	4.371	9.055	0	0	30.787
CNTROB	0.807	4.238	9.053	0	0	30.773
CSTF3	0.785	4.298	9.052	0	0	30.768
PLD6	1.212	2.664	9.05	0	0	30.751
ARRB2	0.894	4.453	9.05	0	0	30.747
C2	1.44	3.12	9.049	0	0	30.74
TCEA1	0.916	5.528	9.048	0	0	30.733
TCF19	1.301	4.971	9.046	0	0	30.72
SERP1	0.699	6.735	9.045	0	0	30.71
NAA10	0.871	4.693	9.045	0	0	30.709
CDKN2D	0.964	4.719	9.043	0	0	30.698
METTL23	0.727	4.721	9.043	0	0	30.696
SGO1	1.076	2.325	9.043	0	0	30.693
PLS3	0.928	6.924	9.041	0	0	30.678
NUP93	0.794	4.098	9.04	0	0	30.673
R3HDM1	0.894	3.879	9.039	0	0	30.666
METTL7A	-1.885	3.996	-9.039	0	0	30.661
CARD19	0.895	4.463	9.039	0	0	30.66
PPP1R9A	-0.842	0.38	-9.036	0	0	30.638
SMR3A	-1.143	0.241	-9.035	0	0	30.635
LLPH	0.76	3.466	9.034	0	0	30.623
SF3B4	0.789	7.145	9.034	0	0	30.623
CACTIN	0.716	3.686	9.029	0	0	30.588
GFER	0.806	4.06	9.029	0	0	30.583
PYGO2	0.767	5.487	9.028	0	0	30.574
PCED1A	1.061	4.786	9.027	0	0	30.568
CLN6	0.864	5.119	9.026	0	0	30.565
MEX3D	1.031	4.714	9.025	0	0	30.554
ZNF133	0.811	3.344	9.025	0	0	30.552
LAMP5	2.02	2.733	9.023	0	0	30.538
E2F3	0.995	3.733	9.022	0	0	30.533
CBX2	1.549	3.431	9.02	0	0	30.514
SFXN5	0.78	2.309	9.015	0	0	30.479
DUS2	0.726	3.792	9.013	0	0	30.457
SHROOM3	-1.363	2.319	-9.011	0	0	30.447
SLC35C2	0.659	4.623	9.008	0	0	30.425
TMC6	0.937	4.444	9.006	0	0	30.406
PFKFB1	-0.65	0.575	-9.006	0	0	30.406
NOL11	0.734	5.155	9.005	0	0	30.401
JAG2	1.253	5.441	9.004	0	0	30.388
COX7A2L	0.653	5.379	9.003	0	0	30.378
GART	0.832	5.151	9.002	0	0	30.373
ALDH1L1	-1.576	1.038	-9	0	0	30.36
XPO1	0.873	5.512	9	0	0	30.356
MYPOP	0.769	3.864	8.997	0	0	30.336
AMMECR1L	0.773	4.465	8.996	0	0	30.325
SLC39A13	1.123	4.578	8.996	0	0	30.324
ENPP3	-0.847	0.346	-8.994	0	0	30.314
CPXM1	2.079	4.166	8.994	0	0	30.309
SEPHS2	0.771	6.203	8.994	0	0	30.308
SRC	0.986	5.474	8.993	0	0	30.305
RSAD2	2.351	4.29	8.991	0	0	30.286
SLC15A4	0.705	3.952	8.989	0	0	30.274
CASQ1	-2.737	1.405	-8.988	0	0	30.266
POLD2	0.764	6.838	8.988	0	0	30.262
CD109	1.445	5.217	8.988	0	0	30.262
EIF2B1	0.575	5.481	8.987	0	0	30.26
SUB1	0.759	5.562	8.986	0	0	30.253
PSMA6	0.897	4.147	8.984	0	0	30.233
POP1	0.955	3.282	8.983	0	0	30.223
EPOR	0.877	1.884	8.982	0	0	30.218
GLO1	0.826	7.508	8.981	0	0	30.208
NPLOC4	0.683	5.799	8.98	0	0	30.199
TMX1	0.933	5.476	8.979	0	0	30.197
NEDD8	0.723	5.8	8.979	0	0	30.196
HLA-C	1.359	10.357	8.978	0	0	30.187
CDC37	0.593	7.46	8.978	0	0	30.185
SNRPA	0.725	6.42	8.976	0	0	30.17
DPP9	0.768	4.852	8.975	0	0	30.164
PLPP4	2.05	2.214	8.975	0	0	30.164
ELAVL1	0.703	5.151	8.974	0	0	30.155
FBXL19	0.867	4.773	8.974	0	0	30.153
EXOSC3	0.938	4.399	8.974	0	0	30.152
HLA-F	1.637	6.033	8.973	0	0	30.147
MAP11	0.762	4.31	8.969	0	0	30.113
FAM83H	1.117	7.225	8.967	0	0	30.103
B3GNT6	-1.416	0.619	-8.966	0	0	30.09
SH2D5	2.112	2.718	8.965	0	0	30.085
FTSJ3	0.756	5.397	8.964	0	0	30.076
PDCD10	0.953	5.622	8.964	0	0	30.074
SRRT	0.707	6.164	8.963	0	0	30.074
FRZB	-1.673	1.908	-8.963	0	0	30.073
PDAP1	0.737	7.229	8.962	0	0	30.061
ILF2	0.774	7.977	8.961	0	0	30.055
UPK1A	-1.934	1.146	-8.96	0	0	30.05
CCL11	2.027	2.356	8.959	0	0	30.036
PCGF2	0.97	4.549	8.956	0	0	30.014
TIGAR	0.89	4.113	8.953	0	0	29.992
LSG1	1.018	5.313	8.952	0	0	29.988
TRABD	0.778	5.751	8.95	0	0	29.973
ZIC5	1.436	1.451	8.948	0	0	29.954
WDCP	0.863	3.123	8.945	0	0	29.933
ACP1	0.677	5.571	8.939	0	0	29.887
C4orf46	0.981	3.193	8.935	0	0	29.853
KREMEN2	2.133	3.37	8.933	0	0	29.841
POLE3	0.882	6.801	8.932	0	0	29.832
CLVS1	-0.291	0.163	-8.927	0	0	29.79
COPG1	0.818	7.212	8.924	0	0	29.766
TAC1	-0.394	0.095	-8.924	0	0	29.765
EN1	2.018	2.359	8.922	0	0	29.753
MICA	0.987	4.322	8.922	0	0	29.752
AKIP1	0.9	4.61	8.922	0	0	29.752
TMEM203	0.664	6.291	8.921	0	0	29.748
SRSF1	0.691	7.256	8.916	0	0	29.705
PLPPR2	1.01	4.565	8.915	0	0	29.699
SMCO2	0.811	1.312	8.913	0	0	29.684
ALKBH1	0.728	3.623	8.911	0	0	29.663
STX10	0.698	6.016	8.909	0	0	29.653
MLF2	0.683	7.58	8.909	0	0	29.651
SMYD5	0.738	4.824	8.907	0	0	29.639
AMIGO2	1.992	4.126	8.907	0	0	29.638
LIN52	0.938	3.285	8.905	0	0	29.622
AP2S1	0.77	7.596	8.904	0	0	29.613
APBB2	1.14	3.205	8.902	0	0	29.597
PPP1CA	0.706	8.048	8.902	0	0	29.596
ZNF622	0.718	6.012	8.901	0	0	29.589
TYK2	0.935	4.864	8.9	0	0	29.583
SNRPE	0.9	6.377	8.899	0	0	29.571
SCG5	1.574	2.09	8.899	0	0	29.57
PALB2	0.863	3.83	8.897	0	0	29.562
RHBDF2	0.976	4.808	8.896	0	0	29.547
CKLF	0.968	3.854	8.895	0	0	29.545
NIPA1	1.043	3.243	8.895	0	0	29.545
TREM1	1.824	2.369	8.893	0	0	29.531
SASS6	0.969	2.763	8.892	0	0	29.523
MNAT1	0.818	3.965	8.888	0	0	29.486
SCN2B	-0.798	0.55	-8.888	0	0	29.485
RAB35	0.611	5.763	8.887	0	0	29.479
CMC2	0.697	2.656	8.885	0	0	29.469
PSMD7	0.658	6.722	8.885	0	0	29.467
ASB10	-1.041	0.363	-8.884	0	0	29.455
TMTC3	1.126	4.713	8.884	0	0	29.454
SNX31	-1.75	1.174	-8.882	0	0	29.445
NPHP4	0.709	2.057	8.882	0	0	29.44
AMPD1	-1.865	1.066	-8.881	0	0	29.438
GAST	2.424	2.586	8.88	0	0	29.426
MAP3K10	0.799	3.387	8.879	0	0	29.42
SF3A3	0.659	5.777	8.877	0	0	29.4
FTL	1.296	12.227	8.876	0	0	29.397
MAB21L4	-2.511	3.949	-8.875	0	0	29.387
NFKBIE	1.1	4.586	8.871	0	0	29.357
PIGT	0.868	7.271	8.87	0	0	29.353
CDK2AP2	0.92	6.374	8.867	0	0	29.33
HOXC10	2.299	2.478	8.867	0	0	29.325
CTLA4	1.49	2.42	8.866	0	0	29.319
OTUB1	0.625	6.244	8.863	0	0	29.297
HOPX	-2.227	4.342	-8.863	0	0	29.293
IFI30	0.766	1.21	8.863	0	0	29.293
CXorf56	0.741	4.811	8.861	0	0	29.283
MAP4K4	0.981	5.606	8.86	0	0	29.27
CIAO2A	0.762	5.081	8.86	0	0	29.27
LTBP1	1.951	5.686	8.859	0	0	29.262
RCC1	0.933	5.668	8.857	0	0	29.246
RABIF	0.575	4.61	8.857	0	0	29.246
ATAD5	1.028	2.201	8.855	0	0	29.238
SLC16A6	-1.308	1.946	-8.855	0	0	29.235
LIN37	0.615	2.151	8.853	0	0	29.217
CEP89	0.722	3.179	8.851	0	0	29.2
BUD31	0.744	5.878	8.847	0	0	29.176
PLEKHA6	-1.405	1.799	-8.847	0	0	29.17
TMEM177	0.825	3.579	8.846	0	0	29.163
TMC8	1.397	3.29	8.843	0	0	29.145
TMEM60	0.744	5.051	8.843	0	0	29.142
DDX54	0.658	5.85	8.841	0	0	29.124
POC5	0.815	2.805	8.836	0	0	29.09
PRB1	-1.002	0.206	-8.836	0	0	29.09
RRAS2	1.093	4.806	8.836	0	0	29.09
NIPSNAP1	0.944	5.875	8.835	0	0	29.076
AIP	0.897	6.398	8.834	0	0	29.075
C1orf50	0.607	3.404	8.83	0	0	29.042
YBX1	0.712	9.617	8.83	0	0	29.042
FGF10	-0.837	0.441	-8.83	0	0	29.038
VPS16	0.65	5.108	8.829	0	0	29.034
TEAD4	1.015	5.204	8.829	0	0	29.031
KLC2	0.932	4.677	8.827	0	0	29.017
SP140L	0.984	3.484	8.825	0	0	29
CLEC11A	1.613	4.231	8.824	0	0	28.996
CHD1L	0.796	4.86	8.824	0	0	28.994
HNRNPU	0.738	7.151	8.823	0	0	28.991
HNRNPD	0.778	6.511	8.823	0	0	28.991
PAX9	-1.97	3.49	-8.823	0	0	28.99
TSPAN10	1.476	2.383	8.821	0	0	28.97
PGK1	0.908	8.46	8.82	0	0	28.963
AEBP1	2.166	6.921	8.818	0	0	28.946
DNAH17	2.043	2.459	8.817	0	0	28.94
TOP3A	0.816	3.787	8.816	0	0	28.937
METTL1	0.783	4.577	8.812	0	0	28.902
HEYL	1.485	3.006	8.812	0	0	28.902
LCN6	-0.386	0.224	-8.811	0	0	28.892
DBR1	0.933	4.232	8.81	0	0	28.888
KHDC4	1.04	3.863	8.809	0	0	28.879
GDPD3	-1.832	3.314	-8.809	0	0	28.879
TBC1D7	0.696	2.746	8.808	0	0	28.869
PPAT	0.998	3.505	8.807	0	0	28.868
TGFBR1	1.054	5.084	8.807	0	0	28.867
MANBA	1.035	3.45	8.807	0	0	28.864
AKAP8L	0.65	4.479	8.806	0	0	28.857
CCDC58	0.94	4.635	8.805	0	0	28.851
GCNT3	-1.99	1.999	-8.804	0	0	28.845
TRIM27	0.756	4.306	8.804	0	0	28.84
NEK10	-0.439	0.196	-8.802	0	0	28.83
SLC6A4	-0.938	0.464	-8.802	0	0	28.83
SZRD1	0.589	6.603	8.802	0	0	28.828
LTF	-4.301	3.079	-8.8	0	0	28.811
RELB	1.162	5.215	8.8	0	0	28.808
APTX	0.812	4.68	8.798	0	0	28.795
NAV1	1.33	3.911	8.798	0	0	28.792
CASK	1.12	4.174	8.795	0	0	28.77
GNAI1	1.121	5.206	8.792	0	0	28.751
FCF1	0.788	5.063	8.792	0	0	28.749
THSD1	1.706	3.884	8.792	0	0	28.749
AK2	0.678	6.023	8.792	0	0	28.749
[truncated: 9,096 more rows]
