# Supplementary material for: Mitochondrial-related genes markers that predict survival in patients with head and neck squamous cell carcinoma affect immunomodulation through hypoxia, glycolysis, and angiogenesis pathways
Source: Aging (Albany NY). 2023 Oct 4;15(19):10347–69. doi: 10.18632/aging.205081 (PMC10599748; doi:10.18632/aging.205081)
Supplement: Supplementary Table 3 [file aging-15-205081-s003.xlsx]

## Sheet: Supplementary Table 3
Supplementary Table 3. Clustering results of GSE41613 subtypes.
Samples	Cluster
GSM1020099	C1
GSM1020100	C1
GSM1020101	C3
GSM1020102	C3
GSM1020103	C2
GSM1020104	C1
GSM1020105	C2
GSM1020106	C2
GSM1020107	C3
GSM1020108	C1
GSM1020109	C2
GSM1020110	C3
GSM1020111	C3
GSM1020112	C2
GSM1020113	C3
GSM1020114	C3
GSM1020115	C1
GSM1020116	C2
GSM1020117	C2
GSM1020118	C3
GSM1020119	C2
GSM1020120	C2
GSM1020121	C2
GSM1020122	C2
GSM1020123	C3
GSM1020124	C3
GSM1020125	C3
GSM1020126	C2
GSM1020127	C1
GSM1020128	C2
GSM1020129	C1
GSM1020130	C3
GSM1020131	C3
GSM1020132	C2
GSM1020133	C3
GSM1020134	C1
GSM1020135	C1
GSM1020136	C1
GSM1020137	C2
GSM1020138	C3
GSM1020139	C3
GSM1020140	C2
GSM1020141	C1
GSM1020142	C2
GSM1020143	C1
GSM1020144	C1
GSM1020145	C2
GSM1020146	C2
GSM1020147	C2
GSM1020148	C1
GSM1020149	C2
GSM1020150	C3
GSM1020151	C2
GSM1020152	C2
GSM1020153	C2
GSM1020154	C2
GSM1020155	C1
GSM1020156	C2
GSM1020157	C2
GSM1020158	C2
GSM1020159	C1
GSM1020160	C1
GSM1020161	C2
GSM1020162	C1
GSM1020163	C1
GSM1020164	C2
GSM1020165	C3
GSM1020166	C2
GSM1020167	C1
GSM1020168	C2
GSM1020169	C1
GSM1020170	C1
GSM1020171	C1
GSM1020172	C2
GSM1020173	C1
GSM1020174	C2
GSM1020175	C2
GSM1020176	C1
GSM1020177	C1
GSM1020178	C1
GSM1020179	C1
GSM1020180	C2
GSM1020181	C2
GSM1020182	C2
GSM1020183	C1
GSM1020184	C2
GSM1020185	C2
GSM1020186	C3
GSM1020187	C2
GSM1020188	C1
GSM1020189	C1
GSM1020190	C1
GSM1020191	C3
GSM1020192	C1
GSM1020193	C1
GSM1020194	C3
GSM1020195	C1
