# Supplementary material for: Mitochondrial-related genes markers that predict survival in patients with head and neck squamous cell carcinoma affect immunomodulation through hypoxia, glycolysis, and angiogenesis pathways
Source: Aging (Albany NY). 2023 Oct 4;15(19):10347–69. doi: 10.18632/aging.205081 (PMC10599748; doi:10.18632/aging.205081)
Supplement: Supplementary Table 4 [file aging-15-205081-s004.xlsx]

## Sheet: Supplementary Table 4
Supplementary Table 4. Differentially expressed genes in C1 group.
Tag	logFC	AveExpr	t	P.Value	adj.P.Val	B
BIRC5	-1.009	5.82	-15.981	0	0	95.383
UBE2C	-1.003	6.918	-14.438	0	0	79.473
CD320	-1.023	4.976	-13.59	0	0	70.994
GINS2	-1.003	4.314	-13.508	0	0	70.195
UBE2T	-1.022	5.601	-13.49	0	0	70.015
AURKB	-1.017	5.47	-13.35	0	0	68.64
TRIP13	-1.008	4.645	-13.277	0	0	67.927
RFC4	-1.053	4.965	-13.212	0	0	67.296
PIMREG	-1.128	3.516	-12.751	0	0	62.848
MELTF	-1.348	3.437	-11.402	0	0	50.318
RNF222	1.403	1.993	11.36	0	0	49.945
KRT8	-2.295	6.346	-11.239	0	0	48.866
EPCAM	-1.753	5.456	-11.227	0	0	48.751
CMBL	-1.116	3.729	-11.091	0	0	47.549
RAC3	-1.288	4.457	-10.855	0	0	45.471
VSIG10L	1.497	3.985	10.762	0	0	44.659
S100A9	1.925	13.312	10.695	0	0	44.079
SPINK5	1.94	5.818	10.672	0	0	43.883
KRT18	-1.188	7.199	-10.593	0	0	43.198
S100A8	2.072	11.638	10.557	0	0	42.893
FAM241B	-1.03	3.801	-10.464	0	0	42.092
PRSS27	1.53	3.117	10.453	0	0	42.002
ISYNA1	-1.336	4.207	-10.435	0	0	41.85
NCCRP1	1.941	6.051	10.412	0	0	41.653
KRT78	2.064	3.833	10.373	0	0	41.32
SPINK7	2.282	2.973	10.316	0	0	40.836
LYNX1	1.624	4.924	10.315	0	0	40.831
CNFN	2.163	8.538	10.275	0	0	40.492
SDR9C7	1.83	3.859	10.267	0	0	40.421
CLDN17	1.52	1.54	10.246	0	0	40.244
SIX4	-1.008	2.252	-10.223	0	0	40.052
SPRR2A	2.478	9.406	10.191	0	0	39.785
ENDOU	1.515	2.169	10.19	0	0	39.78
TGM5	1.131	2.422	10.133	0	0	39.297
MEST	-1.091	4.229	-10.109	0	0	39.097
C10orf99	2.024	7.049	10.101	0	0	39.034
ZNF185	1.058	6.688	10.083	0	0	38.881
LYPD3	1.227	8.996	10.07	0	0	38.773
SCEL	1.7	4.518	10.043	0	0	38.549
CYSRT1	1.645	5.038	10.041	0	0	38.536
RCOR2	-1.079	2.033	-10.027	0	0	38.419
PYCR1	-1.127	5.285	-9.965	0	0	37.902
KRT6C	2.549	8.797	9.878	0	0	37.184
S100A7A	2.354	4.097	9.861	0	0	37.043
KPRP	1.77	2.47	9.849	0	0	36.947
LIPK	1.194	1.762	9.806	0	0	36.597
BPIFC	1.305	1.626	9.801	0	0	36.553
PLA2G4D	1.299	1.586	9.733	0	0	35.998
GDPD3	1.098	3.165	9.676	0	0	35.533
SPNS2	1.074	3.743	9.664	0	0	35.439
SPRR2E	2.617	8.764	9.661	0	0	35.417
LYPD5	1.239	3.989	9.622	0	0	35.101
STEAP4	1.331	2.701	9.618	0	0	35.064
IVL	1.93	7.606	9.577	0	0	34.733
BNIPL	1.262	4.255	9.575	0	0	34.717
CSTB	1.008	9.761	9.551	0	0	34.529
AQP3	1.673	8.747	9.551	0	0	34.528
DSC2	1.17	6.675	9.539	0	0	34.43
BICDL2	1.031	3.695	9.531	0	0	34.368
CLIC3	1.375	5.669	9.523	0	0	34.303
ATP10B	1.02	1.84	9.517	0	0	34.253
SLC6A14	1.625	3.18	9.507	0	0	34.175
RAET1E	1.217	3.035	9.448	0	0	33.705
EPGN	1.719	3.187	9.441	0	0	33.65
CDSN	1.461	1.684	9.433	0	0	33.585
SULT2B1	1.442	5.493	9.422	0	0	33.498
ENO2	-1.155	4.536	-9.399	0	0	33.314
STC2	-1.046	3.465	-9.358	0	0	32.988
ACER1	1.072	1.246	9.347	0	0	32.897
SPRR2B	2.579	5.205	9.327	0	0	32.744
PLA2G4E	1.631	3.962	9.312	0	0	32.626
A2ML1	1.764	5.76	9.301	0	0	32.537
DEFB4A	2.406	3.721	9.261	0	0	32.222
SPRR2F	2.392	4.942	9.258	0	0	32.197
HAL	1.032	0.995	9.175	0	0	31.545
SLURP1	2.375	5.165	9.164	0	0	31.465
KRT80	1.317	5.784	9.159	0	0	31.422
WFDC12	2.119	3.421	9.13	0	0	31.198
LCE3E	2.268	4.537	9.096	0	0	30.929
MAB21L4	1.408	3.745	9.035	0	0	30.458
PGLYRP4	1.301	3.788	9.009	0	0	30.257
S100A12	1.854	5.723	9.001	0	0	30.2
SPRR2D	2.059	8.555	8.951	0	0	29.811
PPL	1.131	7.02	8.927	0	0	29.632
HOPX	1.231	4.162	8.917	0	0	29.554
ABCA12	1.141	3.469	8.907	0	0	29.472
CRCT1	2.202	5.687	8.857	0	0	29.096
TENT5B	1.302	5.509	8.829	0	0	28.881
ZNF750	1.126	5.749	8.808	0	0	28.719
ANKRD22	1.002	4.87	8.784	0	0	28.54
SPRR1B	1.972	11.122	8.759	0	0	28.35
DUSP9	-1.136	2.785	-8.755	0	0	28.317
GSDMA	1.513	3.279	8.738	0	0	28.191
PGLYRP3	1.35	4.947	8.713	0	0	28.006
VSIG8	1.525	2.095	8.675	0	0	27.719
TMPRSS11D	1.693	5.394	8.652	0	0	27.549
DSG1	2.297	5.174	8.647	0	0	27.506
KRT1	2.927	6.204	8.641	0	0	27.467
IL36A	1.834	2.61	8.631	0	0	27.392
PDZK1IP1	1.475	7.125	8.611	0	0	27.238
HMGA2	-1.158	2.409	-8.552	0	0	26.802
TMPRSS11F	1.074	2.209	8.55	0	0	26.786
GJB2	1.46	9.546	8.544	0	0	26.745
LCE2D	1.091	0.905	8.463	0	0	26.14
IL36RN	1.664	4.986	8.444	0	0	26.002
RPTN	1.616	2.433	8.436	0	0	25.943
ALOX12B	1.608	3.624	8.398	0	0	25.664
KRT2	1.442	1.421	8.393	0	0	25.627
KRT6B	1.679	10.972	8.363	0	0	25.408
LCE2C	1.254	1.172	8.339	0	0	25.236
HEY1	-1.12	3.364	-8.338	0	0	25.224
SLPI	1.383	10.367	8.326	0	0	25.138
MUC15	1.195	2.565	8.312	0	0	25.039
PLA2G4F	1.037	3.078	8.283	0	0	24.83
S100A7	2.298	9.815	8.246	0	0	24.559
LCE2A	1.231	1.125	8.242	0	0	24.531
SPRR1A	2.049	10.74	8.236	0	0	24.489
SPRR2G	2.499	6.753	8.188	0	0	24.144
LCE3A	1.97	3.754	8.183	0	0	24.107
CSTA	1.206	9.461	8.17	0	0	24.015
TGM1	1.626	6.654	8.168	0	0	24.002
LCE3D	2.24	6.106	8.129	0	0	23.718
CRNN	2.442	3.786	8.045	0	0	23.122
IL1RN	1.069	7.468	8.018	0	0	22.928
ALDH3B2	1.172	6.088	8	0	0	22.802
ANKRD35	1.011	2.995	7.996	0	0	22.771
FLG	1.055	1.483	7.951	0	0	22.458
SERPINB13	1.309	5.455	7.873	0	0	21.912
MLF1	-1.106	4.036	-7.858	0	0	21.805
FAM25A	1.962	5.259	7.855	0	0	21.785
RDH12	1.372	2.856	7.799	0	0	21.396
KRT16	1.584	11.879	7.772	0	0	21.213
LCE2B	1.218	1.111	7.753	0	0	21.078
DKK1	-1.392	3.535	-7.736	0	0	20.966
FKBP10	-1.082	5.505	-7.73	0	0	20.921
SLC5A1	1.084	2.435	7.723	0	0	20.873
PNCK	-1.041	1.675	-7.693	0	0	20.666
SBSN	1.947	8.4	7.684	0	0	20.604
B4GALNT4	-1.12	2.204	-7.682	0	0	20.591
SLC39A2	1.096	3.534	7.627	0	0	20.221
NUDT11	-1.044	2.687	-7.626	0	0	20.215
CYP4F22	1.362	2.787	7.618	0	0	20.154
GRHL3	1.032	5.1	7.61	0	0	20.106
TGM3	2.294	4.485	7.574	0	0	19.859
KRT10	1.586	7.815	7.527	0	0	19.543
KLK12	1.689	3.909	7.52	0	0	19.493
SERPINB3	1.614	6.324	7.413	0	0	18.782
WFDC5	1.228	4.767	7.399	0	0	18.684
KLK7	1.731	5.669	7.342	0	0	18.306
THEM5	1.061	4.008	7.332	0	0	18.245
DMKN	1.279	6.185	7.29	0	0	17.967
UCHL1	-1.469	3.96	-7.284	0	0	17.93
TMPRSS11E	1.511	4.731	7.273	0	0	17.855
LCE1A	1.21	1.324	7.266	0	0	17.811
C1QTNF12	-1.187	2.558	-7.266	0	0	17.807
KRTCAP3	-1.189	4.913	-7.246	0	0	17.679
CYP2C18	1.071	2.766	7.226	0	0	17.549
RPL39L	-1.148	5.168	-7.224	0	0	17.533
KLK13	1.737	5.179	7.149	0	0	17.047
PRR9	1.641	2.739	7.105	0	0	16.769
SERPINB4	1.552	4.952	7.096	0	0	16.709
PI3	1.879	11.092	7.068	0	0	16.526
CCDC8	-1.106	3.137	-7.063	0	0	16.497
POF1B	1.235	4.086	7.016	0	0	16.196
PNLIPRP3	1.333	2.519	6.983	0	0	15.991
RHCG	1.7	7.196	6.96	0	0	15.841
GJB6	1.445	7.737	6.959	0	0	15.839
LY6G6C	1.394	4.434	6.859	0	0	15.208
SCNN1B	1.039	2.918	6.827	0	0	15.01
CEACAM6	1.341	5.403	6.81	0	0	14.902
PLA2G3	1.067	2.658	6.788	0	0	14.77
CWH43	1.261	2.551	6.78	0	0	14.719
TSPAN1	-1.27	4.867	-6.771	0	0	14.663
KLK6	1.533	5.401	6.665	0	0	14.009
CLCA4	1.291	3.075	6.656	0	0	13.954
HEPHL1	1.428	4.543	6.648	0	0	13.907
KRTDAP	2.042	8.204	6.612	0	0	13.689
CAPNS2	1.095	5.474	6.578	0	0	13.486
SPRR3	2.105	7.398	6.499	0	0	13.009
APOBEC3A	1.083	4.556	6.485	0	0	12.925
TMEM45B	1.081	3.877	6.363	0	0	12.208
MAL	1.57	3.856	6.336	0	0	12.051
PADI3	-1.223	3.485	-6.215	0	0	11.347
FABP5	1.072	8.93	6.198	0	0	11.253
DEFB1	1.2	6.117	6.176	0	0	11.123
BARX1	-1.001	2.796	-6.128	0	0	10.85
LOR	1.075	1.377	6.056	0	0	10.444
CA9	-1.181	4.901	-6.001	0	0	10.139
NIPAL4	1.004	4.98	5.992	0	0	10.089
ASPRV1	1.367	3.846	5.981	0	0	10.027
LCE3C	1.03	1.092	5.939	0	0	9.791
FAM83C	1.007	5.038	5.938	0	0	9.789
CEACAM7	1.003	1.725	5.923	0	0	9.707
LYPD2	1.455	3.937	5.92	0	0	9.69
DSC1	1.21	2.492	5.916	0	0	9.664
SPP1	-1.277	6.592	-5.913	0	0	9.647
CST6	1.057	4.864	5.882	0	0	9.48
KLK11	1.11	5.477	5.878	0	0	9.455
AC011473.4	1.081	3.399	5.859	0	0	9.356
KRT24	1.384	2.338	5.721	0	0	8.606
SPINK6	1.43	3.089	5.692	0	0	8.456
CEACAM5	1.34	4.486	5.69	0	0	8.445
MUC21	1.205	1.731	5.689	0	0	8.436
KLK10	1.179	6.998	5.503	0	0	7.464
SPRR4	1.225	3.671	5.384	0	0	6.855
KLK8	1.104	5.384	5.34	0	0	6.632
LY6D	1.125	9.23	5.26	0	0	6.234
LCN2	1.107	7.578	5.228	0	0	6.071
KRT13	1.747	8.115	5.218	0	0	6.026
IL36G	1.04	5.553	5.161	0	0	5.743
PRSS21	-1.066	2.457	-5.104	0	0	5.465
CASP14	1.335	3.703	4.96	0	0	4.78
FGFBP2	-1.02	1.684	-4.91	0	0	4.544
AKR1B10	1.129	7.106	4.901	0	0	4.503
KRT19	-1.752	7.265	-4.872	0	0	4.368
GPC3	-1.014	2.889	-4.796	0	0	4.021
KRT4	1.543	4.884	4.77	0	0	3.901
KLK5	1.341	5.781	4.738	0	0	3.755
CALML5	1.225	7.368	4.641	0	0	3.321
KRT75	1.091	4.882	4.602	0	0	3.15
WFDC2	-1.106	3.931	-4.211	0	0	1.499
NTS	-1.281	2.578	-4.119	0	0	1.132
GPX2	-1.045	6.396	-4.048	0	0	0.85
KLK14	1.002	3.647	3.986	0	0	0.612
