# Supplementary material for: Mitochondrial-related genes markers that predict survival in patients with head and neck squamous cell carcinoma affect immunomodulation through hypoxia, glycolysis, and angiogenesis pathways
Source: Aging (Albany NY). 2023 Oct 4;15(19):10347–69. doi: 10.18632/aging.205081 (PMC10599748; doi:10.18632/aging.205081)
Supplement: Supplementary Table 5 [file aging-15-205081-s005.xlsx]

## Sheet: Supplementary Table 5
Supplementary Table 5. Differentially expressed genes in C2 group.
Tag	logFC	AveExpr	t	P.Value	adj.P.Val	B
PCDHGC3	-2.009	3.951	-15.246	0	0	87.647
ADCY7	-1.243	2.902	-13.587	0	0	70.938
MYO5A	-1.253	4.169	-13.432	0	0	69.417
KIRREL1	-1.47	4.743	-13.381	0	0	68.912
TENM2	-2.335	4.894	-13.356	0	0	68.677
COL12A1	-1.982	5.967	-13.234	0	0	67.482
BCL9L	-1.36	4.389	-13.233	0	0	67.479
MCRIP2	1.107	3.273	13.166	0	0	66.83
TIMP3	-1.662	2.152	-13.155	0	0	66.716
EFNB2	-1.362	5.64	-13.023	0	0	65.445
VCL	-1.054	5.965	-12.87	0	0	63.979
SEC24C	-1.369	4.886	-12.812	0	0	63.423
ENAH	-1.078	5.245	-12.74	0	0	62.734
MN1	-1.536	3.684	-12.674	0	0	62.109
PAFAH1B3	1.064	5.868	12.64	0	0	61.782
LATS2	-1.012	3.669	-12.633	0	0	61.714
TGFBR2	-1.414	5.464	-12.607	0	0	61.471
CPEB4	-1.067	3.315	-12.496	0	0	60.42
UBXN11	1.086	3.056	12.46	0	0	60.076
ENTPD7	-1.199	4.298	-12.448	0	0	59.964
F2RL1	-1.605	5.376	-12.399	0	0	59.502
NFAT5	-1.171	2.822	-12.355	0	0	59.088
MXD3	1.044	2.271	12.287	0	0	58.458
DYNC1LI2	-1.081	4.743	-12.27	0	0	58.295
SIGIRR	1.055	3.757	12.227	0	0	57.897
MACF1	-1.003	4.49	-12.222	0	0	57.844
WNK1	-1.079	5.618	-12.213	0	0	57.769
MICAL2	-1.381	3.667	-12.168	0	0	57.346
PRRG1	-1.014	2.354	-12.103	0	0	56.745
MYOF	-1.186	6.389	-12.093	0	0	56.653
WDR34	1.033	6.237	12.093	0	0	56.65
ZNF541	1.495	0.765	12.072	0	0	56.45
ATP10D	-1.112	4.354	-12.038	0	0	56.142
ACTN1	-1.259	6.947	-11.978	0	0	55.582
C8G	1.419	1.388	11.945	0	0	55.283
KLF7	-1.118	4.213	-11.91	0	0	54.954
PCP2	1.085	1.118	11.885	0	0	54.728
DHDH	1.135	1.96	11.863	0	0	54.527
NOCT	-1.115	4.087	-11.834	0	0	54.259
NRIP1	-1.325	4.821	-11.825	0	0	54.177
INHBA	-2.142	5.013	-11.812	0	0	54.06
IRS1	-1.353	4.092	-11.744	0	0	53.435
THBS1	-1.91	6.149	-11.717	0	0	53.188
MYO1B	-1.225	6.114	-11.639	0	0	52.483
EML1	-1.211	2.643	-11.62	0	0	52.312
F2R	-1.34	4.967	-11.575	0	0	51.902
AHNAK2	-1.604	5.827	-11.51	0	0	51.318
SEMA3C	-1.671	5.089	-11.455	0	0	50.823
MYH10	-1.297	4.582	-11.443	0	0	50.707
FAP	-1.621	3.096	-11.402	0	0	50.343
CENPM	1.075	4.49	11.389	0	0	50.228
CLMP	-1.572	3.619	-11.377	0	0	50.119
NAV1	-1.1	4.019	-11.334	0	0	49.734
MSN	-1.057	8.539	-11.297	0	0	49.399
AHNAK	-1.108	7.866	-11.264	0	0	49.112
CAP2	-1.293	2.965	-11.264	0	0	49.105
ADAM17	-1.189	4.702	-11.26	0	0	49.075
FAM83B	-1.468	5.257	-11.249	0	0	48.974
NID2	-1.532	2.809	-11.237	0	0	48.868
ITGB1	-1.36	7.161	-11.227	0	0	48.777
NID1	-1.693	5.224	-11.214	0	0	48.662
AL035461.3	1.09	2.396	11.211	0	0	48.639
MFAP3	-1.049	3.481	-11.161	0	0	48.191
CDK6	-1.293	4.622	-11.141	0	0	48.016
CDH13	-1.426	3.749	-10.954	0	0	46.366
HTR7	-1.647	2.861	-10.95	0	0	46.333
ASAP2	-1.192	3.349	-10.878	0	0	45.708
TBC1D14	-1.03	3.86	-10.877	0	0	45.699
ULBP3	-1.196	3.021	-10.821	0	0	45.206
COL5A2	-1.797	6.617	-10.788	0	0	44.924
TSHZ3	-1.172	3.001	-10.776	0	0	44.822
MXRA5	-1.821	5.138	-10.756	0	0	44.643
FBLIM1	-1.044	6.279	-10.751	0	0	44.597
GCHFR	1.188	2.384	10.745	0	0	44.553
TRIO	-1.005	4.03	-10.696	0	0	44.122
EDNRA	-1.295	3.678	-10.69	0	0	44.072
HIF1A	-1.053	7.488	-10.686	0	0	44.04
CALD1	-1.19	5.873	-10.676	0	0	43.95
LIMA1	-1.009	6.758	-10.605	0	0	43.344
MISP3	1.038	2.083	10.598	0	0	43.283
COL4A1	-1.319	7.1	-10.585	0	0	43.167
ZNF770	-1.303	4.416	-10.499	0	0	42.439
GJB2	-2.022	9.546	-10.45	0	0	42.02
SYNE4	1.235	1.092	10.448	0	0	42.003
COL5A1	-1.785	6.541	-10.428	0	0	41.829
ITGA5	-1.413	6.037	-10.418	0	0	41.749
ARHGAP4	1.392	3.652	10.399	0	0	41.588
MIOX	1.005	0.621	10.392	0	0	41.526
GJB6	-2.392	7.737	-10.391	0	0	41.514
SORCS2	-1.506	2.949	-10.38	0	0	41.423
SYNC	-1.02	1.783	-10.379	0	0	41.417
SIRPA	-1.064	5.737	-10.355	0	0	41.211
GTF2I	-1.063	3.635	-10.352	0	0	41.186
ZBED6	-1.245	2.22	-10.322	0	0	40.936
EVC	-1.053	3.319	-10.286	0	0	40.628
ITPRID2	-1.015	5.793	-10.246	0	0	40.29
HSPA12A	-1.098	2.213	-10.236	0	0	40.206
SYCE2	1.039	1.11	10.235	0	0	40.199
SAMD9	-1.471	5.95	-10.229	0	0	40.151
ZFR2	1.077	0.46	10.13	0	0	39.325
ADGRA2	-1.261	3.124	-10.126	0	0	39.289
SLC7A1	-1.013	6.149	-10.094	0	0	39.025
GJA1	-1.474	8.588	-10.079	0	0	38.901
CLCA2	-1.682	8.301	-10.021	0	0	38.416
IL1R1	-1.065	4.613	-10.016	0	0	38.374
NIPAL1	-1.02	3.319	-9.966	0	0	37.966
SYNGR3	1.33	1.72	9.965	0	0	37.953
E2F1	1.058	4.662	9.952	0	0	37.85
C19orf57	1.044	2.015	9.938	0	0	37.729
USP34	-1.019	3.391	-9.927	0	0	37.64
SULF2	-1.377	6.823	-9.894	0	0	37.369
YBX2	1.339	1.164	9.867	0	0	37.148
TNC	-1.859	7.644	-9.86	0	0	37.09
VGLL3	-1.064	1.66	-9.844	0	0	36.961
ZNF469	-1.257	2.232	-9.807	0	0	36.658
MMP2	-1.546	7.265	-9.791	0	0	36.525
DCBLD1	-1.042	4.209	-9.749	0	0	36.181
CRIM1	-1.023	4.996	-9.738	0	0	36.092
DMRTA2	1.557	1.146	9.72	0	0	35.951
MGLL	-1.08	4.258	-9.714	0	0	35.898
SLC24A3	-1.337	3.613	-9.702	0	0	35.808
COL5A3	-1.321	4.975	-9.698	0	0	35.772
BCAT1	-1.369	2.836	-9.69	0	0	35.709
ETS1	-1.075	5.181	-9.662	0	0	35.48
PLXDC2	-1.165	3.759	-9.662	0	0	35.48
COL6A3	-1.714	6.144	-9.644	0	0	35.335
CHST11	-1.055	4.417	-9.628	0	0	35.203
PRSS23	-1.229	4.803	-9.545	0	0	34.542
SYCP2	1.48	1.287	9.485	0	0	34.056
NUPR1	1.329	4.663	9.453	0	0	33.805
F13A1	-1.666	3.762	-9.442	0	0	33.72
MAN1A1	-1.165	4.58	-9.421	0	0	33.553
FN1	-2.068	7.332	-9.414	0	0	33.493
COL3A1	-1.896	9.506	-9.405	0	0	33.42
HSPG2	-1.422	5.465	-9.38	0	0	33.225
CRISPLD2	-1.152	4.053	-9.36	0	0	33.064
TSTD1	1.101	5.664	9.334	0	0	32.861
ADAM12	-1.474	3.616	-9.294	0	0	32.547
SERPINE1	-1.698	7.789	-9.277	0	0	32.411
SPOCK1	-1.6	3.018	-9.26	0	0	32.278
MET	-1.005	5.402	-9.258	0	0	32.262
ADAMTS15	-1.41	2.733	-9.255	0	0	32.237
COL1A1	-1.793	9.75	-9.244	0	0	32.157
FLRT2	-1.097	2.04	-9.239	0	0	32.118
KCNJ15	-1.156	3.365	-9.231	0	0	32.049
KHK	1.011	2.305	9.207	0	0	31.862
ANTXR2	-1.115	3.267	-9.206	0	0	31.859
HEG1	-1.046	4.449	-9.169	0	0	31.57
CDH11	-1.413	3.273	-9.136	0	0	31.313
FERMT1	-1.057	6.107	-9.129	0	0	31.259
SRPX	-1.51	3.92	-9.116	0	0	31.155
CAV1	-1.422	7.637	-9.114	0	0	31.139
FSTL1	-1.241	6.157	-9.103	0	0	31.055
ADAMTS12	-1.317	2.724	-9.081	0	0	30.885
NIPAL4	-1.704	4.98	-9.074	0	0	30.829
NT5E	-1.552	4.49	-9.061	0	0	30.729
GASK1B	-1.149	3.418	-9.021	0	0	30.425
LTBP1	-1.334	5.844	-9.011	0	0	30.344
BASP1	-1.327	6.371	-9.006	0	0	30.306
THSD1	-1.181	4.022	-8.992	0	0	30.202
FLRT3	-1.77	3.162	-8.988	0	0	30.166
ARSJ	-1.136	3.463	-8.966	0	0	30.001
TLL1	-1.098	1.493	-8.961	0	0	29.962
TENM3	-1.23	2.62	-8.947	0	0	29.855
DYSF	-1.018	3.361	-8.936	0	0	29.77
BNC1	-1.222	5.957	-8.935	0	0	29.758
PCDH7	-1.415	3.581	-8.927	0	0	29.698
RHBDL1	1.078	2.004	8.918	0	0	29.632
CYP26B1	-1.307	3.594	-8.89	0	0	29.42
MBOAT2	-1.038	4.703	-8.842	0	0	29.056
TCP11	1.009	0.67	8.836	0	0	29.004
TCEA3	1.236	4.039	8.832	0	0	28.977
RHPN1	1.164	2.215	8.817	0	0	28.866
VCAN	-1.597	4.179	-8.812	0	0	28.826
KRT6A	-1.465	13.067	-8.811	0	0	28.82
LPAR3	-1.13	4.684	-8.805	0	0	28.772
PPP2R2C	-1.443	4.528	-8.805	0	0	28.771
TLX3	1.342	0.873	8.802	0	0	28.747
MEI1	1.243	1.519	8.763	0	0	28.459
HEPHL1	-2.134	4.543	-8.759	0	0	28.427
NPR2	-1.113	2.305	-8.731	0	0	28.215
GLT8D2	-1.076	3.002	-8.722	0	0	28.143
ADAMTS2	-1.375	4.626	-8.705	0	0	28.019
DSP	-1.175	9.533	-8.704	0	0	28.014
THBD	-1.348	6.286	-8.683	0	0	27.853
COL1A2	-1.693	8.703	-8.682	0	0	27.849
FILIP1L	-1.054	3.701	-8.657	0	0	27.661
RIBC2	1.153	2.23	8.655	0	0	27.643
MSX2	-1.01	2.558	-8.653	0	0	27.632
KANK4	-1.268	1.556	-8.653	0	0	27.63
PDGFRB	-1.216	5.322	-8.635	0	0	27.496
SLC16A2	-1.213	3.595	-8.621	0	0	27.391
NOXA1	1.08	3.047	8.61	0	0	27.312
TGFB2	-1.056	2.59	-8.604	0	0	27.261
DSG3	-1.24	8.729	-8.602	0	0	27.251
DACT1	-1.221	2.211	-8.583	0	0	27.108
MT-ND4L	-1.101	11.134	-8.582	0	0	27.104
NPM2	1.039	1.518	8.581	0	0	27.095
LAMA4	-1.04	3.936	-8.572	0	0	27.03
LOXL2	-1.201	5.106	-8.56	0	0	26.939
PDGFC	-1.062	3.555	-8.553	0	0	26.883
DAB2	-1.019	3.618	-8.54	0	0	26.79
COL4A2	-1.022	7.278	-8.536	0	0	26.764
MMP13	-2.594	5.105	-8.534	0	0	26.747
ANO1	-1.653	5.912	-8.533	0	0	26.739
SHISAL1	-1.228	2.359	-8.491	0	0	26.43
MSRB3	-1.038	2.912	-8.477	0	0	26.325
CDKN2C	1.159	3.887	8.477	0	0	26.324
SHANK2	-1.071	1.539	-8.474	0	0	26.301
MAFB	-1.082	6.364	-8.459	0	0	26.189
TGFBI	-1.501	7.771	-8.455	0	0	26.16
TAF7L	1.009	0.587	8.408	0	0	25.822
LAMA2	-1.037	2.143	-8.364	0	0	25.494
SLITRK6	-1.589	2.992	-8.359	0	0	25.461
TNS3	-1	4.119	-8.352	0	0	25.407
F3	-1.487	6.921	-8.338	0	0	25.309
ITGA6	-1.135	8.379	-8.326	0	0	25.219
SMC1B	1.214	0.824	8.316	0	0	25.147
CA12	-1.263	6.298	-8.274	0	0	24.847
PXDN	-1.282	4.656	-8.265	0	0	24.781
ABCA12	-1.245	3.469	-8.241	0	0	24.609
PMEPA1	-1.151	5.964	-8.238	0	0	24.585
FAM3B	1.684	1.739	8.233	0	0	24.548
THBS2	-1.506	5.908	-8.222	0	0	24.471
MFAP5	-1.642	3.603	-8.21	0	0	24.387
FBN2	-1.493	2.502	-8.198	0	0	24.3
HOXC13	-1.115	3.382	-8.198	0	0	24.295
CAMK2N1	-1.149	4.392	-8.193	0	0	24.265
STAG3	1.159	1.158	8.139	0	0	23.876
PYGL	-1.051	6.737	-8.138	0	0	23.871
PCDHGC5	-1.017	1.275	-8.109	0	0	23.663
ANKRD65	1.172	3.899	8.094	0	0	23.555
FBN1	-1.384	4.118	-8.064	0	0	23.343
GPR143	1.012	1.83	8.009	0	0	22.953
SLC7A5	-1.039	8.416	-7.988	0	0	22.805
ARSI	-1.35	4.362	-7.961	0	0	22.615
FAT1	-1.179	5.534	-7.909	0	0	22.252
AKAP12	-1.048	2.463	-7.891	0	0	22.13
TIMP2	-1.138	6.338	-7.889	0	0	22.113
SLC6A11	-1.275	2.64	-7.884	0	0	22.081
COL11A1	-1.769	3.062	-7.865	0	0	21.948
LRRC15	-1.609	3.543	-7.833	0	0	21.723
SMIM22	1.508	2.088	7.817	0	0	21.615
GPR68	-1.017	4.866	-7.767	0	0	21.27
MMP10	-2.214	6.228	-7.765	0	0	21.254
EGFR	-1.075	6.292	-7.752	0	0	21.166
POSTN	-1.723	6.495	-7.75	0	0	21.148
SPON1	-1.213	3.094	-7.746	0	0	21.122
DKK3	-1.035	5.893	-7.743	0	0	21.103
COL8A1	-1.277	3.056	-7.742	0	0	21.098
NMU	1.241	4.253	7.736	0	0	21.054
TNFRSF18	1.159	4.923	7.735	0	0	21.05
PAQR5	-1.108	3.057	-7.732	0	0	21.029
GREM1	-1.184	3.312	-7.703	0	0	20.828
LAMA3	-1.34	6.236	-7.665	0	0	20.568
LTBP2	-1.013	5.391	-7.634	0	0	20.362
PTHLH	-1.602	6.719	-7.628	0	0	20.315
SERPINE2	-1.296	4.864	-7.606	0	0	20.171
DCN	-1.207	5.487	-7.595	0	0	20.092
GPR1	-1.05	2.593	-7.552	0	0	19.802
MME	-1.145	2.268	-7.552	0	0	19.801
MMP1	-1.868	8.614	-7.474	0	0	19.28
MALL	-1.043	3.744	-7.468	0	0	19.243
M1AP	1.03	1.015	7.46	0	0	19.188
TMSB15A	1.159	1.685	7.459	0	0	19.178
SLC7A8	-1.159	6.281	-7.451	0	0	19.128
DSG1	-2.35	5.174	-7.446	0	0	19.094
TNFAIP6	-1.085	3.74	-7.416	0	0	18.897
AMIGO2	-1.155	4.288	-7.415	0	0	18.886
COL6A1	-1.17	8.098	-7.413	0	0	18.873
GPC6	-1.048	1.965	-7.41	0	0	18.856
APCDD1L	-1.102	2.068	-7.41	0	0	18.853
ISYNA1	1.158	4.207	7.393	0	0	18.743
VEGFC	-1.278	4.242	-7.358	0	0	18.514
BGN	-1.155	8.736	-7.331	0	0	18.333
SFRP2	-1.602	6.998	-7.314	0	0	18.22
SPARC	-1.129	9.214	-7.262	0	0	17.88
CSPG4	-1.341	5.062	-7.248	0	0	17.789
GALNT6	-1.075	4.719	-7.221	0	0	17.615
LIPK	-1.067	1.762	-7.221	0	0	17.613
GSDMA	-1.491	3.279	-7.218	0	0	17.594
DSC2	-1.07	6.675	-7.215	0	0	17.577
GOLGA7B	-1.159	3.41	-7.185	0	0	17.379
MSC	-1.091	4.427	-7.159	0	0	17.217
MRC1	-1.079	2.957	-7.143	0	0	17.108
SLC22A3	-1.241	2.811	-7.127	0	0	17.01
SYT7	-1.068	3.361	-7.078	0	0	16.693
COL10A1	-1.535	3.627	-7.076	0	0	16.681
WNT7A	-1.109	2.58	-7.054	0	0	16.541
PHYHD1	1.316	2.477	7.045	0	0	16.487
MMP3	-1.818	5.953	-7.039	0	0	16.446
PODXL2	1.514	3.794	7.036	0	0	16.425
COL15A1	-1.02	4.442	-7.026	0	0	16.366
FNDC1	-1.321	3.13	-7	0	0	16.195
FOXJ1	1.17	1.036	6.978	0	0	16.058
INHBB	-1.017	3.085	-6.976	0	0	16.046
FLNC	-1.462	3.452	-6.96	0	0	15.945
KRT6B	-1.658	10.972	-6.935	0	0	15.788
EREG	-1.559	3.054	-6.913	0	0	15.648
LAMC2	-1.285	8.711	-6.9	0	0	15.571
AEBP1	-1.15	7.097	-6.881	0	0	15.45
IGF2	-1.131	4.417	-6.876	0	0	15.422
CPA4	-1.413	4.001	-6.865	0	0	15.347
PDPN	-1.012	6.497	-6.855	0	0	15.291
KLK7	-1.892	5.669	-6.826	0	0	15.105
FZD10	-1.041	3.771	-6.797	0	0	14.929
CNGB1	-1.196	2.195	-6.779	0	0	14.819
ITGA11	-1.036	2.279	-6.779	0	0	14.815
CDA	-1.465	5.741	-6.774	0	0	14.788
NPW	1.081	1.828	6.768	0	0	14.749
SNCG	1.155	4.337	6.758	0	0	14.687
CLDN7	1.135	6.035	6.718	0	0	14.444
KRT6C	-2.117	8.797	-6.707	0	0	14.378
CLDN3	1.414	1.646	6.703	0	0	14.349
SULF1	-1.231	4.768	-6.702	0	0	14.344
NEFH	1.163	1.089	6.684	0	0	14.232
FIBIN	-1.073	2.596	-6.675	0	0	14.177
F2RL2	-1.031	3.204	-6.652	0	0	14.041
DIO2	-1.018	3.887	-6.61	0	0	13.788
MYOM3	-1.072	2.193	-6.609	0	0	13.779
NPPC	1.094	1.06	6.608	0	0	13.774
EDIL3	-1.102	3.419	-6.602	0	0	13.736
COL4A6	-1.165	3.241	-6.6	0	0	13.726
LUM	-1.111	7.796	-6.524	0	0	13.271
SERPINB3	-1.671	6.324	-6.495	0	0	13.099
KREMEN2	1.084	3.543	6.433	0	0	12.729
S100A7A	-1.873	4.097	-6.39	0	0	12.478
TJP3	1.025	2.066	6.34	0	0	12.184
TMEM45A	-1.057	5.174	-6.315	0	0	12.035
KRT19	2.581	7.265	6.231	0	0	11.555
LCE3E	-1.874	4.537	-6.185	0	0	11.287
KRT8	1.59	6.346	6.18	0	0	11.258
IGFL2	-1.206	2.753	-6.112	0	0	10.873
PNLIPRP3	-1.373	2.519	-6.089	0	0	10.744
PGLYRP3	-1.14	4.947	-6.082	0	0	10.706
FAM83A	-1.214	6.564	-6.034	0	0	10.435
STEAP4	-1.023	2.701	-6.02	0	0	10.358
FHL1	-1.205	4.183	-6.016	0	0	10.335
CA2	-1.176	6.299	-6.014	0	0	10.326
EPGN	-1.338	3.187	-6.002	0	0	10.256
KRT1	-2.45	6.204	-5.98	0	0	10.134
POPDC3	-1.015	2.819	-5.954	0	0	9.995
CEL	1.273	2.004	5.95	0	0	9.969
CAVIN4	-1.068	1.842	-5.945	0	0	9.94
SLC10A6	-1.009	3.621	-5.942	0	0	9.927
XIRP1	-1.056	1.611	-5.922	0	0	9.814
DSC1	-1.407	2.492	-5.889	0	0	9.633
KPRP	-1.301	2.47	-5.861	0	0	9.483
CASP14	-1.824	3.703	-5.857	0	0	9.46
CDSN	-1.111	1.684	-5.849	0	0	9.415
PGLYRP4	-1.028	3.788	-5.843	0	0	9.382
AREG	-1.236	6.067	-5.807	0	0	9.189
KRT14	-1.452	13.199	-5.738	0	0	8.818
CASQ2	-1.375	2.131	-5.708	0	0	8.657
SPRR2G	-2.074	6.753	-5.634	0	0	8.266
KRTCAP3	1.101	4.913	5.634	0	0	8.266
NEB	-1.17	1.736	-5.622	0	0	8.201
SLC7A11	-1.036	3.073	-5.618	0	0	8.181
LCE3D	-1.858	6.106	-5.593	0	0	8.05
EPHX3	1.421	3.514	5.578	0	0	7.974
KRT75	-1.526	4.882	-5.562	0	0	7.888
PLAC8	1.087	2.35	5.52	0	0	7.671
CDKN2A	1.483	3.584	5.47	0	0	7.416
KLK8	-1.3	5.384	-5.389	0	0	7
ACTC1	-1.814	2.779	-5.385	0	0	6.982
KLK10	-1.345	6.998	-5.366	0	0	6.885
CHRNA1	-1.102	1.807	-5.342	0	0	6.764
BEX2	1.093	3.264	5.333	0	0	6.721
COL17A1	-1.091	8.676	-5.269	0	0	6.4
CALML5	1.613	7.368	5.263	0	0	6.371
SDR9C7	-1.17	3.859	-5.243	0	0	6.272
ANKRD1	-1.383	2.224	-5.192	0	0	6.019
PLA2G4E	-1.118	3.962	-5.182	0	0	5.97
LCE1F	-1.132	2.22	-5.168	0	0	5.904
FOXA1	1.05	2.389	5.154	0	0	5.837
MZB1	1.15	3.553	5.138	0	0	5.759
RNASE7	-1.082	4.739	-5.138	0	0	5.756
NEFL	-1.208	4.119	-5.086	0	0	5.506
MYBPH	-1.701	2.737	-5.085	0	0	5.5
TSPAN1	1.133	4.867	5.074	0	0	5.448
MYOT	-1.088	1.708	-5.066	0	0	5.409
MYOG	-1.214	1.758	-5.021	0	0	5.196
MYH1	-1.356	1.784	-5.016	0	0	5.173
SFRP4	-1.297	3.472	-4.997	0	0	5.084
IVL	-1.247	7.606	-4.987	0	0	5.035
SERPINB4	-1.294	4.952	-4.946	0	0	4.841
MYF6	-1.083	1.481	-4.94	0	0	4.815
KLK5	-1.629	5.781	-4.937	0	0	4.799
SFRP1	-1.12	3.439	-4.935	0	0	4.789
HSPB3	-1.107	2.975	-4.916	0	0	4.699
DES	-2.012	4.293	-4.895	0	0	4.605
IGFL3	-1.125	2.22	-4.883	0	0	4.546
KLHL41	-1.361	2.114	-4.837	0	0	4.335
NEFM	-1.009	1.618	-4.813	0	0	4.226
ACTN2	-1.349	2.019	-4.807	0	0	4.201
DMKN	-1.003	6.185	-4.756	0	0	3.966
C10orf99	-1.173	7.049	-4.668	0	0	3.571
CSRP3	-1.497	2.316	-4.643	0	0	3.461
LMOD2	-1.033	1.409	-4.635	0	0	3.427
ACTA1	-1.856	3.819	-4.609	0	0	3.31
CWH43	-1.017	2.551	-4.575	0	0	3.165
KRT16	-1.125	11.879	-4.557	0	0	3.084
HSPB7	-1.158	2.214	-4.55	0	0	3.052
MYL1	-1.662	2.839	-4.549	0	0	3.049
MSLN	1.267	3.244	4.53	0	0	2.966
KRT10	-1.152	7.815	-4.527	0	0	2.953
CHGB	-1.133	2.023	-4.512	0	0	2.891
WFDC2	1.379	3.931	4.506	0	0	2.863
SPRR1B	-1.238	11.122	-4.47	0	0	2.709
KRT7	1.137	3.624	4.468	0	0	2.699
MAGEA4	-1.486	2.521	-4.466	0	0	2.693
CCNA1	-1.029	2.812	-4.454	0	0	2.642
KRTDAP	-1.628	8.204	-4.412	0	0	2.464
TNNI1	-1.06	2.798	-4.379	0	0	2.323
MYL2	-1.524	2.747	-4.363	0	0	2.258
SLN	-1.369	2.729	-4.318	0	0	2.07
SMPX	-1.128	1.934	-4.267	0	0	1.862
NRAP	-1.151	1.69	-4.264	0	0	1.849
MSMB	1.149	2.756	4.252	0	0	1.8
MYH2	-1.403	2.11	-4.242	0	0	1.757
SPRR4	-1.138	3.671	-4.238	0	0	1.741
MYBPC2	-1.155	2.208	-4.218	0	0	1.662
KLK6	-1.156	5.401	-4.195	0	0	1.567
CKM	-1.473	3.45	-4.125	0	0	1.289
LCE3A	-1.208	3.754	-4.1	0	0	1.191
WFDC12	-1.171	3.421	-4.064	0	0	1.046
MYH7	-1.133	1.934	-4.024	0	0	0.892
PRR9	-1.118	2.739	-4.013	0	0	0.849
RPS4Y1	1.417	5.096	3.969	0	0	0.679
CRCT1	-1.22	5.687	-3.967	0	0	0.673
THBS4	-1.007	3.114	-3.943	0	0	0.582
IGFL1	-1.112	5.452	-3.872	0	0	0.314
AKR1B10	-1.027	7.106	-3.784	0	0	-0.012
NTS	1.325	2.578	3.634	0	0.001	-0.551
FDCSP	1.425	3.797	3.598	0	0.001	-0.675
MYLPF	-1.06	2.858	-3.557	0	0.001	-0.819
ALDH3A1	1.004	5.494	3.526	0	0.001	-0.924
FABP4	-1.152	3.812	-3.462	0.001	0.001	-1.14
SPRR2B	-1.188	5.205	-3.435	0.001	0.002	-1.233
SBSN	-1.04	8.4	-3.36	0.001	0.002	-1.478
PI3	-1.077	11.092	-3.343	0.001	0.002	-1.535
S100A7	-1.131	9.815	-3.296	0.001	0.002	-1.686
SPRR2E	-1.056	8.764	-3.093	0.002	0.004	-2.318
