# Supplementary material for: Mitochondrial-related genes markers that predict survival in patients with head and neck squamous cell carcinoma affect immunomodulation through hypoxia, glycolysis, and angiogenesis pathways
Source: Aging (Albany NY). 2023 Oct 4;15(19):10347–69. doi: 10.18632/aging.205081 (PMC10599748; doi:10.18632/aging.205081)
Supplement: Supplementary Table 6 [file aging-15-205081-s006.xlsx]

## Sheet: Supplementary Table 6
Supplementary Table 6. Differentially expressed genes in C3 group.
Tag	logFC	AveExpr	t	P.Value	adj.P.Val	B
BCAT1	1.559	2.836	15.321	0	0	88.47
ITGA5	1.502	6.037	15.127	0	0	86.479
ACTN1	1.169	6.947	14.613	0	0	81.219
P4HA1	1.041	5.858	14.544	0	0	80.526
KIRREL1	1.222	4.743	14.068	0	0	75.731
SERPINH1	1.098	7.496	13.451	0	0	69.621
LAMC1	1.011	6.395	13.32	0	0	68.34
SPOCK1	1.677	3.018	12.925	0	0	64.513
SLC39A14	1.081	5.009	12.906	0	0	64.339
SRPX	1.588	3.92	12.756	0	0	62.897
STC2	1.249	3.465	12.666	0	0	62.038
LRP12	1.016	3.162	12.597	0	0	61.381
LOXL2	1.317	5.106	12.541	0	0	60.858
CDK6	1.133	4.622	12.496	0	0	60.43
CDH13	1.256	3.749	12.354	0	0	59.086
THBS1	1.591	6.149	12.317	0	0	58.745
MYH10	1.098	4.582	12.275	0	0	58.349
KDELR3	1.106	4.75	12.242	0	0	58.042
DSG2	1.231	6.164	12.229	0	0	57.918
GOLIM4	1.054	5.539	12.083	0	0	56.557
B4GALNT1	1.118	2.17	12.072	0	0	56.453
FN1	2.026	7.332	12.045	0	0	56.207
DKK3	1.202	5.893	12.038	0	0	56.138
MICAL2	1.093	3.667	11.973	0	0	55.544
EFNB2	1.019	5.64	11.893	0	0	54.804
FERMT2	1.036	2.826	11.865	0	0	54.544
HEYL	1.016	3.126	11.809	0	0	54.033
SERPINE1	1.652	7.789	11.755	0	0	53.54
COL4A1	1.15	7.1	11.753	0	0	53.522
IGF2BP2	1.343	5.346	11.701	0	0	53.04
ARSJ	1.134	3.463	11.694	0	0	52.976
FAP	1.324	3.096	11.684	0	0	52.886
ITGB1	1.123	7.161	11.663	0	0	52.701
ULBP3	1.017	3.021	11.659	0	0	52.66
INHBA	1.691	5.013	11.591	0	0	52.045
CALD1	1.016	5.873	11.555	0	0	51.72
TNC	1.692	7.644	11.527	0	0	51.465
COL4A2	1.041	7.278	11.381	0	0	50.145
RAI14	1.037	4.758	11.343	0	0	49.811
NID1	1.369	5.224	11.343	0	0	49.806
HMGA2	1.37	2.409	11.319	0	0	49.588
PRSS27	-1.523	3.117	-11.276	0	0	49.211
ERVMER34-1	1.019	2.968	11.178	0	0	48.336
AMIGO2	1.307	4.288	11.094	0	0	47.587
BICDL2	-1.085	3.695	-10.984	0	0	46.625
NT5E	1.459	4.49	10.977	0	0	46.562
PHLDB2	1.01	4.261	10.961	0	0	46.418
MSRB3	1.031	2.912	10.93	0	0	46.147
EVA1A	1.245	3.059	10.908	0	0	45.952
CDH11	1.31	3.273	10.876	0	0	45.676
PDGFC	1.041	3.555	10.869	0	0	45.618
CERCAM	1.005	5.002	10.829	0	0	45.269
PLOD2	1.076	4.803	10.822	0	0	45.202
GDPD3	-1.123	3.165	-10.769	0	0	44.74
FSTL1	1.138	6.157	10.691	0	0	44.066
TPM1	1.071	4.866	10.676	0	0	43.942
LAMC2	1.503	8.711	10.663	0	0	43.83
COL5A1	1.455	6.541	10.639	0	0	43.622
COL4A6	1.416	3.241	10.634	0	0	43.574
DKK1	1.692	3.535	10.489	0	0	42.335
APCDD1L	1.185	2.068	10.418	0	0	41.724
SGCE	1.147	3.052	10.401	0	0	41.585
HAS2	1.189	2.782	10.394	0	0	41.528
TENM3	1.117	2.62	10.376	0	0	41.374
SDC2	1.205	4.233	10.321	0	0	40.903
LAMA3	1.385	6.236	10.289	0	0	40.638
PMEPA1	1.115	5.964	10.288	0	0	40.626
ADAM12	1.285	3.616	10.274	0	0	40.505
GPR176	1.108	3.642	10.245	0	0	40.261
DACT1	1.137	2.211	10.241	0	0	40.229
MFAP2	1.049	5.69	10.237	0	0	40.197
KRT78	-1.907	3.833	-10.211	0	0	39.981
TNFAIP6	1.144	3.74	10.176	0	0	39.682
CAMK2N1	1.105	4.392	10.137	0	0	39.359
CYSRT1	-1.551	5.038	-10.127	0	0	39.273
COL5A2	1.365	6.617	10.103	0	0	39.077
COL12A1	1.282	5.967	10.078	0	0	38.865
TGFBI	1.395	7.771	10.064	0	0	38.748
PLAU	1.062	7.985	10.056	0	0	38.687
SULF1	1.406	4.768	10.025	0	0	38.43
MSC	1.171	4.427	10.004	0	0	38.25
POSTN	1.716	6.495	9.963	0	0	37.917
PRSS23	1.014	4.803	9.883	0	0	37.258
SULF2	1.101	6.823	9.864	0	0	37.098
NID2	1.103	2.809	9.858	0	0	37.049
CAV1	1.217	7.637	9.847	0	0	36.957
PTHLH	1.596	6.719	9.801	0	0	36.582
LAMB3	1.013	9.023	9.788	0	0	36.473
PDPN	1.109	6.497	9.777	0	0	36.391
TMEM158	1.018	3.927	9.759	0	0	36.243
TIMP3	1.051	2.152	9.752	0	0	36.183
CSTA	-1.313	9.461	-9.741	0	0	36.097
CTHRC1	1.251	5.789	9.724	0	0	35.955
TENM2	1.432	4.894	9.535	0	0	34.428
PXDN	1.162	4.656	9.528	0	0	34.373
S100A8	-1.78	11.638	-9.523	0	0	34.337
F2RL1	1.038	5.376	9.501	0	0	34.155
ADAMTS12	1.09	2.724	9.429	0	0	33.587
VCAN	1.353	4.179	9.404	0	0	33.387
SEMA3C	1.136	5.089	9.38	0	0	33.198
MAB21L4	-1.36	3.745	-9.375	0	0	33.154
ADAMTS15	1.142	2.733	9.367	0	0	33.093
SERPINE2	1.245	4.864	9.362	0	0	33.056
CLMP	1.073	3.619	9.356	0	0	33.009
MAP1B	1.047	3.069	9.339	0	0	32.871
MXRA5	1.297	5.138	9.334	0	0	32.829
COL10A1	1.57	3.627	9.327	0	0	32.777
EGFR	1.01	6.292	9.304	0	0	32.59
INHBB	1.045	3.085	9.248	0	0	32.154
POPDC3	1.195	2.819	9.132	0	0	31.245
SLC7A8	1.107	6.281	9.101	0	0	31.01
PFN2	1.142	6.448	9.085	0	0	30.885
FBN2	1.308	2.502	9.075	0	0	30.805
SPINK5	-1.584	5.818	-9.063	0	0	30.713
ANO1	1.394	5.912	9.053	0	0	30.637
BSPRY	-1.061	3.857	-9.042	0	0	30.547
CALML5	-2.109	7.368	-9.014	0	0	30.336
COL11A1	1.589	3.062	8.964	0	0	29.947
COL1A1	1.39	9.75	8.893	0	0	29.404
S100A9	-1.541	13.312	-8.877	0	0	29.281
FOXC2	1.038	2.255	8.845	0	0	29.044
FKBP10	1.136	5.505	8.811	0	0	28.781
STC1	1.01	3.932	8.794	0	0	28.653
GPC4	1.242	3.29	8.766	0	0	28.445
SPARC	1.068	9.214	8.756	0	0	28.365
COL6A3	1.262	6.144	8.731	0	0	28.176
NCCRP1	-1.56	6.051	-8.697	0	0	27.92
COL3A1	1.416	9.506	8.667	0	0	27.699
GGT6	-1.06	4.098	-8.63	0	0	27.418
SLITRK6	1.307	2.992	8.614	0	0	27.298
CNFN	-1.736	8.538	-8.576	0	0	27.021
MMP2	1.097	7.265	8.494	0	0	26.41
CCND1	1.021	6.971	8.492	0	0	26.395
COL6A1	1.049	8.098	8.41	0	0	25.794
SCNN1B	-1.172	2.918	-8.409	0	0	25.787
DPYSL3	1.099	5.165	8.369	0	0	25.493
PCDHGC3	1	3.951	8.347	0	0	25.335
FUT6	-1.105	1.682	-8.342	0	0	25.295
KRT24	-1.824	2.338	-8.326	0	0	25.181
SPINK7	-1.774	2.973	-8.301	0	0	25.002
COL1A2	1.304	8.703	8.3	0	0	24.99
EDIL3	1.078	3.419	8.233	0	0	24.51
CLIC3	-1.133	5.669	-8.216	0	0	24.386
TGM2	1.037	4.642	8.209	0	0	24.335
BGN	1.01	8.736	8.084	0	0	23.445
AEBP1	1.063	7.097	8.067	0	0	23.321
FST	1.02	6.234	8.061	0	0	23.281
MFAP5	1.284	3.603	7.984	0	0	22.735
VEGFC	1.095	4.242	7.925	0	0	22.32
MMP7	1.451	4.598	7.9	0	0	22.146
TSPAN18	1.026	3.113	7.873	0	0	21.954
HTRA3	1.01	5.258	7.857	0	0	21.848
CRNN	-2.23	3.786	-7.824	0	0	21.616
COL8A1	1.031	3.056	7.808	0	0	21.502
SFRP2	1.359	6.998	7.794	0	0	21.408
IL36A	-1.559	2.61	-7.736	0	0	21.01
MAL	-1.759	3.856	-7.72	0	0	20.903
SPRR2F	-1.907	4.942	-7.706	0	0	20.8
THBS2	1.128	5.908	7.621	0	0	20.227
FBN1	1.046	4.118	7.545	0	0	19.711
PDZK1IP1	-1.227	7.125	-7.535	0	0	19.643
SLPI	-1.184	10.367	-7.531	0	0	19.617
SPP1	1.489	6.592	7.516	0	0	19.513
MMP13	1.845	5.105	7.46	0	0	19.142
SPRR2A	-1.739	9.406	-7.314	0	0	18.176
SHISA2	1.1	3.093	7.302	0	0	18.094
SPRR3	-2.189	7.398	-7.296	0	0	18.056
SULT2B1	-1.077	5.493	-7.286	0	0	17.992
RHCG	-1.632	7.196	-7.155	0	0	17.137
PEG10	1.084	1.869	7.148	0	0	17.092
MMP10	1.644	6.228	7.137	0	0	17.021
CSPG4	1.053	5.062	7.09	0	0	16.722
TFPI2	1.161	2.091	7.077	0	0	16.636
DEFB4A	-1.767	3.721	-7.038	0	0	16.388
CXCL17	-1.378	4.88	-6.982	0	0	16.032
F3	1.013	6.921	6.957	0	0	15.876
LYPD2	-1.574	3.937	-6.926	0	0	15.68
FAM3D	-1.23	2.897	-6.902	0	0	15.531
LYNX1	-1.068	4.924	-6.886	0	0	15.43
TMPRSS11B	-1.071	1.517	-6.83	0	0	15.077
DEFB1	-1.22	6.117	-6.751	0	0	14.593
MMP11	1.143	5.184	6.745	0	0	14.552
EPHX3	-1.357	3.514	-6.736	0	0	14.497
MZB1	-1.184	3.553	-6.721	0	0	14.409
SLURP1	-1.684	5.165	-6.707	0	0	14.322
CEACAM7	-1.044	1.725	-6.643	0	0	13.931
KRT13	-2.049	8.115	-6.642	0	0	13.923
CD79A	-1.194	3.421	-6.64	0	0	13.912
MUC21	-1.285	1.731	-6.546	0	0	13.345
TMPRSS11D	-1.217	5.394	-6.446	0	0	12.748
PCP4L1	-1.047	2.741	-6.438	0	0	12.704
CLCA4	-1.151	3.075	-6.309	0	0	11.946
CHGB	1.236	2.023	6.248	0	0	11.59
TMPRSS11A	-1.279	3.232	-6.242	0	0	11.56
SPRR2E	-1.614	8.764	-6.054	0	0	10.491
SPRR1A	-1.44	10.74	-6.008	0	0	10.233
LCN2	-1.174	7.578	-5.97	0	0	10.02
A2ML1	-1.104	5.76	-5.94	0	0	9.856
TGM3	-1.711	4.485	-5.911	0	0	9.696
CCNA1	1.076	2.812	5.892	0	0	9.592
AREG	1.001	6.067	5.874	0	0	9.494
S100P	-1.106	5.556	-5.846	0	0	9.338
TGM1	-1.121	6.654	-5.841	0	0	9.31
MMP1	1.192	8.614	5.83	0	0	9.255
IGLL5	-1.293	4.519	-5.809	0	0	9.141
TMPRSS11E	-1.121	4.731	-5.656	0	0	8.318
SPRR2B	-1.496	5.205	-5.493	0	0	7.471
CEACAM5	-1.207	4.486	-5.464	0	0	7.322
SPRR2D	-1.23	8.555	-5.458	0	0	7.287
FAM25A	-1.306	5.259	-5.426	0	0	7.124
KLK12	-1.166	3.909	-5.408	0	0	7.033
S100A12	-1.091	5.723	-5.402	0	0	7.003
PRAME	1.059	2.287	5.28	0	0	6.39
KRT4	-1.539	4.884	-5.097	0	0	5.496
C10orf99	-1.019	7.049	-5.078	0	0	5.403
SFRP4	1.05	3.472	5.049	0	0	5.263
JCHAIN	-1.118	5.9	-4.846	0	0	4.312
WFDC12	-1.105	3.421	-4.813	0	0	4.161
S100A7	-1.286	9.815	-4.729	0	0	3.779
CRCT1	-1.145	5.687	-4.675	0	0	3.534
SBSN	-1.037	8.4	-4.21	0	0	1.557
ACTC1	1.138	2.779	4.167	0	0	1.385
MYBPH	1.029	2.737	3.795	0	0	-0.042
FDCSP	-1.149	3.797	-3.622	0	0.001	-0.665
DES	1.205	4.293	3.618	0	0.001	-0.678
ACTA1	1.052	3.819	3.224	0.001	0.003	-1.988
