# Supplementary material for: Mitochondrial-related genes markers that predict survival in patients with head and neck squamous cell carcinoma affect immunomodulation through hypoxia, glycolysis, and angiogenesis pathways
Source: Aging (Albany NY). 2023 Oct 4;15(19):10347–69. doi: 10.18632/aging.205081 (PMC10599748; doi:10.18632/aging.205081)
Supplement: Supplementary Table 7 [file aging-15-205081-s007.xlsx]

## Sheet: Supplementary Table 7
Supplementary Table 7. Results of GO and KEGG pathways for differentially upregulated genes in C3 isoforms.
Tag	geneSet	description	link	size	overlap	expect	enrichmentRatio	pValue	FDR	overlapId	userId	DB
1	hsa04510	Focal adhesion	http://www.kegg.jp/kegg-bin/show_pathway?hsa04510+1277+1278+1282+1284+1288+1291+1293+1956+2335+3371+3678+3688+3909+3914+3915+3918+56034+595+6696+7057+7058+7424+857+87	190	24	2.33255	10.2892	0	0	1277;1278;1282;1284;1288;1291;1293;1956;2335;3371;3678;3688;3909;3914;3915;3918;56034;595;6696;7057;7058;7424;857;87	ITGA5;ACTN1;LAMC1;THBS1;FN1;COL4A1;ITGB1;TNC;COL4A2;PDGFC;LAMC2;COL4A6;LAMA3;CAV1;LAMB3;EGFR;COL1A1;COL6A3;CCND1;COL6A1;COL1A2;VEGFC;THBS2;SPP1	pathway_KEGG
2	hsa04512	ECM-receptor interaction	http://www.kegg.jp/kegg-bin/show_pathway?hsa04512+1277+1278+1282+1284+1288+1291+1293+2335+3371+3678+3688+3909+3914+3915+3918+6696+7057+7058	81	18	0.994403	18.1013	0	0	1277;1278;1282;1284;1288;1291;1293;2335;3371;3678;3688;3909;3914;3915;3918;6696;7057;7058	ITGA5;LAMC1;THBS1;FN1;COL4A1;ITGB1;TNC;COL4A2;LAMC2;COL4A6;LAMA3;LAMB3;COL1A1;COL6A3;COL6A1;COL1A2;THBS2;SPP1	pathway_KEGG
3	hsa04151	PI3K-Akt signaling pathway	http://www.kegg.jp/kegg-bin/show_pathway?hsa04151+1021+1277+1278+1282+1284+1288+1291+1293+1956+2335+3371+3678+3688+374+3909+3914+3915+3918+56034+595+6696+7057+7058+7424	333	24	4.0881	5.87069	2.93765e-13	2.46315e-11	1021;1277;1278;1282;1284;1288;1291;1293;1956;2335;3371;3678;3688;374;3909;3914;3915;3918;56034;595;6696;7057;7058;7424	ITGA5;LAMC1;CDK6;THBS1;FN1;COL4A1;ITGB1;TNC;COL4A2;PDGFC;LAMC2;COL4A6;LAMA3;LAMB3;EGFR;COL1A1;COL6A3;CCND1;COL6A1;COL1A2;VEGFC;THBS2;SPP1;AREG	pathway_KEGG
4	hsa05165	Human papillomavirus infection	http://www.kegg.jp/kegg-bin/show_pathway?hsa05165+1021+1277+1278+1282+1284+1288+1291+1293+1956+2335+26508+3371+3678+3688+3909+3914+3915+3918+595+6696+7057+7058+8900	302	23	3.70753	6.20359	3.30624e-13	2.46315e-11	1021;1277;1278;1282;1284;1288;1291;1293;1956;2335;26508;3371;3678;3688;3909;3914;3915;3918;595;6696;7057;7058;8900	ITGA5;LAMC1;CDK6;THBS1;FN1;HEYL;COL4A1;ITGB1;TNC;COL4A2;LAMC2;COL4A6;LAMA3;LAMB3;EGFR;COL1A1;COL6A3;CCND1;COL6A1;COL1A2;THBS2;SPP1;CCNA1	pathway_KEGG
5	hsa04974	Protein digestion and absorption	http://www.kegg.jp/kegg-bin/show_pathway?hsa04974+1277+1278+1281+1282+1284+1288+1289+1290+1291+1293+1300+1301+23428	65	13	0.797978	16.2912	4.33875e-13	2.5859e-11	1277;1278;1281;1282;1284;1288;1289;1290;1291;1293;1300;1301;23428	COL4A1;COL4A2;COL5A1;COL4A6;COL5A2;COL10A1;SLC7A8;COL11A1;COL1A1;COL6A3;COL3A1;COL6A1;COL1A2	pathway_KEGG
6	hsa05146	Amoebiasis	http://www.kegg.jp/kegg-bin/show_pathway?hsa05146+1277+1278+1281+1282+1284+1288+2335+3909+3914+3915+3918+87	92	12	1.12945	10.6247	7.21758e-10	3.58473e-08	1277;1278;1281;1282;1284;1288;2335;3909;3914;3915;3918;87	ACTN1;LAMC1;FN1;COL4A1;COL4A2;LAMC2;COL4A6;LAMA3;LAMB3;COL1A1;COL3A1;COL1A2	pathway_KEGG
7	hsa04933	AGE-RAGE signaling pathway in diabetic complications	http://www.kegg.jp/kegg-bin/show_pathway?hsa04933+1277+1278+1281+1282+1284+1288+2152+2335+4313+5054+595+7424	97	12	1.19083	10.077	1.3524e-09	5.75737e-08	1277;1278;1281;1282;1284;1288;2152;2335;4313;5054;595;7424	FN1;SERPINE1;COL4A1;COL4A2;COL4A6;COL1A1;COL3A1;MMP2;CCND1;COL1A2;VEGFC;F3	pathway_KEGG
8	hsa05222	Small cell lung cancer	http://www.kegg.jp/kegg-bin/show_pathway?hsa05222+1021+1282+1284+1288+2335+3688+3909+3914+3915+3918+595	93	11	1.14172	9.63457	1.145e-08	4.26511e-07	1021;1282;1284;1288;2335;3688;3909;3914;3915;3918;595	LAMC1;CDK6;FN1;COL4A1;ITGB1;COL4A2;LAMC2;COL4A6;LAMA3;LAMB3;CCND1	pathway_KEGG
9	hsa04926	Relaxin signaling pathway	http://www.kegg.jp/kegg-bin/show_pathway?hsa04926+1277+1278+1281+1282+1284+1288+1956+4312+4313+4322+7424	126	11	1.54685	7.11123	2.78104e-07	9.20832e-06	1277;1278;1281;1282;1284;1288;1956;4312;4313;4322;7424	COL4A1;COL4A2;COL4A6;EGFR;COL1A1;COL3A1;MMP2;COL1A2;VEGFC;MMP13;MMP1	pathway_KEGG
10	hsa05206	MicroRNAs in cancer	http://www.kegg.jp/kegg-bin/show_pathway?hsa05206+1021+1956+3371+3678+5328+595+7057+7078+7168+8091	144	10	1.76783	5.65666	8.25967e-06	0.000246138	1021;1956;3371;3678;5328;595;7057;7078;7168;8091	ITGA5;CDK6;THBS1;TNC;HMGA2;TPM1;PLAU;TIMP3;EGFR;CCND1	pathway_KEGG
11	hsa05205	Proteoglycans in cancer	http://www.kegg.jp/kegg-bin/show_pathway?hsa05205+1956+2335+3678+3688+4313+5328+595+6383+7057+7078+857	183	11	2.24661	4.89626	1.12421e-05	0.000304558	1956;2335;3678;3688;4313;5328;595;6383;7057;7078;857	ITGA5;THBS1;FN1;ITGB1;SDC2;PLAU;CAV1;TIMP3;EGFR;MMP2;CCND1	pathway_KEGG
12	hsa05200	Pathways in cancer	http://www.kegg.jp/kegg-bin/show_pathway?hsa05200+1021+1282+1284+1288+1956+2335+26508+3688+3909+3914+3915+3918+4312+4313+595+7424+8900	487	17	5.9787	2.84343	5.5127e-05	0.00136899	1021;1282;1284;1288;1956;2335;26508;3688;3909;3914;3915;3918;4312;4313;595;7424;8900	LAMC1;CDK6;FN1;HEYL;COL4A1;ITGB1;COL4A2;LAMC2;COL4A6;LAMA3;LAMB3;EGFR;MMP2;CCND1;VEGFC;CCNA1;MMP1	pathway_KEGG
13	hsa05219	Bladder cancer	http://www.kegg.jp/kegg-bin/show_pathway?hsa05219+1956+4312+4313+595+7057	38	5	0.46651	10.7179	8.8139e-05	0.00202042	1956;4312;4313;595;7057	THBS1;EGFR;MMP2;CCND1;MMP1	pathway_KEGG
29	GO:0043062	extracellular structure organization	http://amigo.geneontology.org/amigo/term/GO:0043062	320	50	3.69049	13.5483	0	0	165;633;871;1277;1278;1281;1282;1284;1288;1289;1290;1291;1293;1295;1300;1301;1462;2191;2200;2201;2335;3371;3678;3688;3909;3914;3915;3918;4017;4237;4312;4313;4316;4319;4320;4322;4811;5033;5054;5352;6423;6678;6696;7045;7057;8038;8076;10630;22795;90102	ITGA5;P4HA1;SERPINH1;LAMC1;LOXL2;THBS1;FN1;SERPINE1;COL4A1;FAP;ITGB1;TNC;COL4A2;NID1;PHLDB2;PLOD2;LAMC2;COL5A1;COL4A6;LAMA3;ADAM12;MFAP2;COL5A2;TGFBI;NID2;LAMB3;PDPN;VCAN;COL10A1;FBN2;COL11A1;COL1A1;SPARC;COL6A3;COL3A1;MMP2;COL6A1;COL1A2;BGN;AEBP1;MFAP5;MMP7;COL8A1;SFRP2;FBN1;SPP1;MMP13;MMP10;MMP11;MMP1	geneontology_Biological_Process
30	GO:0030198	extracellular matrix organization	http://amigo.geneontology.org/amigo/term/GO:0030198	279	50	3.21764	15.5393	0	0	165;633;871;1277;1278;1281;1282;1284;1288;1289;1290;1291;1293;1295;1300;1301;1462;2191;2200;2201;2335;3371;3678;3688;3909;3914;3915;3918;4017;4237;4312;4313;4316;4319;4320;4322;4811;5033;5054;5352;6423;6678;6696;7045;7057;8038;8076;10630;22795;90102	ITGA5;P4HA1;SERPINH1;LAMC1;LOXL2;THBS1;FN1;SERPINE1;COL4A1;FAP;ITGB1;TNC;COL4A2;NID1;PHLDB2;PLOD2;LAMC2;COL5A1;COL4A6;LAMA3;ADAM12;MFAP2;COL5A2;TGFBI;NID2;LAMB3;PDPN;VCAN;COL10A1;FBN2;COL11A1;COL1A1;SPARC;COL6A3;COL3A1;MMP2;COL6A1;COL1A2;BGN;AEBP1;MFAP5;MMP7;COL8A1;SFRP2;FBN1;SPP1;MMP13;MMP10;MMP11;MMP1	geneontology_Biological_Process
31	GO:0001706	endoderm formation	http://amigo.geneontology.org/amigo/term/GO:0001706	43	14	0.495909	28.231	0	0	1284;1289;1290;1291;1295;1301;2335;3624;3678;3909;3914;4313;8091;22943	ITGA5;FN1;INHBA;COL4A2;HMGA2;COL5A1;DKK1;LAMA3;COL5A2;LAMB3;COL11A1;MMP2;COL6A1;COL8A1	geneontology_Biological_Process
32	GO:0035987	endodermal cell differentiation	http://amigo.geneontology.org/amigo/term/GO:0035987	39	14	0.449778	31.1265	0	0	1284;1289;1290;1291;1295;1301;2335;3624;3678;3909;3914;4313;8091;22943	ITGA5;FN1;INHBA;COL4A2;HMGA2;COL5A1;DKK1;LAMA3;COL5A2;LAMB3;COL11A1;MMP2;COL6A1;COL8A1	geneontology_Biological_Process
33	GO:0007492	endoderm development	http://amigo.geneontology.org/amigo/term/GO:0007492	63	15	0.726565	20.6451	2.22045e-16	2.51399e-13	1284;1289;1290;1291;1295;1301;2335;3624;3678;3909;3914;3915;4313;8091;22943	ITGA5;LAMC1;FN1;INHBA;COL4A2;HMGA2;COL5A1;DKK1;LAMA3;COL5A2;LAMB3;COL11A1;MMP2;COL6A1;COL8A1	geneontology_Biological_Process
34	GO:0030199	collagen fibril organization	http://amigo.geneontology.org/amigo/term/GO:0030199	41	13	0.472844	27.4932	4.44089e-16	4.18998e-13	165;871;1277;1278;1281;1289;1290;1301;4017;4320;5033;5352;6423	P4HA1;SERPINH1;LOXL2;PLOD2;COL5A1;COL5A2;COL11A1;COL1A1;COL3A1;COL1A2;AEBP1;SFRP2;MMP11	geneontology_Biological_Process
35	GO:0001704	formation of primary germ layer	http://amigo.geneontology.org/amigo/term/GO:0001704	95	16	1.09561	14.6037	8.88178e-15	7.18283e-12	1284;1289;1290;1291;1295;1301;2335;3624;3678;3688;3909;3914;4313;6423;8091;22943	ITGA5;FN1;ITGB1;INHBA;COL4A2;HMGA2;COL5A1;DKK1;LAMA3;COL5A2;LAMB3;COL11A1;MMP2;COL6A1;COL8A1;SFRP2	geneontology_Biological_Process
36	GO:0007369	gastrulation	http://amigo.geneontology.org/amigo/term/GO:0007369	145	17	1.67225	10.1659	5.9408e-13	4.20386e-10	1284;1289;1290;1291;1295;1301;2335;3624;3678;3688;3909;3914;4313;6423;8091;22943;90102	ITGA5;FN1;ITGB1;INHBA;COL4A2;HMGA2;PHLDB2;COL5A1;DKK1;LAMA3;COL5A2;LAMB3;COL11A1;MMP2;COL6A1;COL8A1;SFRP2	geneontology_Biological_Process
37	GO:0031589	cell-substrate adhesion	http://amigo.geneontology.org/amigo/term/GO:0031589	272	21	3.13691	6.69448	3.57425e-12	2.2482e-09	87;1012;1021;1277;1281;1295;2335;3678;3688;3915;4811;5054;5328;6695;7057;8910;10085;10630;10979;22795;90102	ITGA5;ACTN1;LAMC1;SPOCK1;CDK6;CDH13;THBS1;FN1;FERMT2;SERPINE1;ITGB1;NID1;PHLDB2;SGCE;PLAU;NID2;PDPN;COL1A1;COL3A1;EDIL3;COL8A1	geneontology_Biological_Process
38	GO:0048729	tissue morphogenesis	http://amigo.geneontology.org/amigo/term/GO:0048729	484	26	5.58186	4.65794	2.87999e-11	1.63036e-08	58;70;374;1281;1282;1289;1291;1293;1301;1948;1956;2239;3371;3624;3678;3688;6423;7052;7168;7424;8091;10512;10630;22943;26508;90102	ITGA5;EFNB2;HEYL;COL4A1;ITGB1;INHBA;TNC;HMGA2;PHLDB2;TPM1;COL5A1;DKK1;PDPN;SEMA3C;EGFR;COL11A1;GPC4;COL6A3;COL3A1;COL6A1;TGM2;VEGFC;SFRP2;AREG;ACTC1;ACTA1	geneontology_Biological_Process
39	GO:0032963	collagen metabolic process	http://amigo.geneontology.org/amigo/term/GO:0032963	75	12	0.864958	13.8735	4.43003e-11	2.27986e-08	871;1277;1289;2191;3688;4312;4313;4316;4319;4320;4322;5352	SERPINH1;FAP;ITGB1;PLOD2;COL5A1;COL1A1;MMP2;MMP7;MMP13;MMP10;MMP11;MMP1	geneontology_Biological_Process
40	GO:0001525	angiogenesis	http://amigo.geneontology.org/amigo/term/GO:0001525	400	23	4.61311	4.98579	1.2557e-10	5.92374e-08	857;1012;1282;1284;1295;1464;1948;2152;2191;2335;3678;3688;4017;4313;5054;6423;6678;7045;7057;7058;7424;8038;8091	ITGA5;LOXL2;CDH13;THBS1;FN1;EFNB2;SERPINE1;COL4A1;FAP;ITGB1;COL4A2;HMGA2;ADAM12;TGFBI;CAV1;SPARC;MMP2;VEGFC;COL8A1;SFRP2;THBS2;CSPG4;F3	geneontology_Biological_Process
41	GO:0001501	skeletal system development	http://amigo.geneontology.org/amigo/term/GO:0001501	373	22	4.30172	5.11423	2.07242e-10	9.02458e-08	165;871;1009;1277;1278;1281;1290;1291;1293;1300;1301;2200;2201;4017;4313;4322;5744;6423;6678;7045;8091;56034	SERPINH1;LOXL2;HMGA2;CDH11;PDGFC;COL5A2;TGFBI;PTHLH;COL10A1;FBN2;COL11A1;COL1A1;SPARC;COL6A3;COL3A1;MMP2;COL6A1;COL1A2;AEBP1;SFRP2;FBN1;MMP13	geneontology_Biological_Process
42	GO:0048514	blood vessel morphogenesis	http://amigo.geneontology.org/amigo/term/GO:0048514	473	24	5.455	4.39963	6.08793e-10	2.4617e-07	857;1012;1281;1282;1284;1295;1464;1948;2152;2191;2335;3678;3688;4017;4313;5054;6423;6678;7045;7057;7058;7424;8038;8091	ITGA5;LOXL2;CDH13;THBS1;FN1;EFNB2;SERPINE1;COL4A1;FAP;ITGB1;COL4A2;HMGA2;ADAM12;TGFBI;CAV1;SPARC;COL3A1;MMP2;VEGFC;COL8A1;SFRP2;THBS2;CSPG4;F3	geneontology_Biological_Process
43	GO:0042060	wound healing	http://amigo.geneontology.org/amigo/term/GO:0042060	444	23	5.12055	4.4917	9.84824e-10	3.60085e-07	87;857;1277;1278;1281;1289;1956;2150;2152;2191;2335;3371;3678;4628;5054;5270;5328;6678;7057;7168;7980;10630;90102	ITGA5;ACTN1;THBS1;MYH10;FN1;SERPINE1;FAP;TNC;PHLDB2;TPM1;COL5A1;PLAU;CAV1;PDPN;F2RL1;SERPINE2;EGFR;COL1A1;SPARC;COL3A1;COL1A2;TFPI2;F3	geneontology_Biological_Process
44	GO:0071711	basement membrane organization	http://amigo.geneontology.org/amigo/term/GO:0071711	19	7	0.219123	31.9456	1.01773e-09	3.60085e-07	1282;3688;3918;4320;4811;22795;90102	COL4A1;ITGB1;NID1;PHLDB2;LAMC2;NID2;MMP11	geneontology_Biological_Process
45	GO:0030574	collagen catabolic process	http://amigo.geneontology.org/amigo/term/GO:0030574	33	8	0.380582	21.0205	2.68367e-09	8.93664e-07	2191;3688;4312;4313;4316;4319;4320;4322	FAP;ITGB1;MMP2;MMP7;MMP13;MMP10;MMP11;MMP1	geneontology_Biological_Process
46	GO:0071230	cellular response to amino acid stimulus	http://amigo.geneontology.org/amigo/term/GO:0071230	49	9	0.565106	15.9262	3.6923e-09	1.16123e-06	1277;1278;1281;1282;1290;1291;1956;4313;56034	COL4A1;PDGFC;COL5A2;EGFR;COL1A1;COL3A1;MMP2;COL6A1;COL1A2	geneontology_Biological_Process
47	GO:0010810	regulation of cell-substrate adhesion	http://amigo.geneontology.org/amigo/term/GO:0010810	166	14	1.91444	7.31284	6.08214e-09	1.81216e-06	1012;1021;1277;1295;2335;3678;4811;5054;5328;6695;7057;10085;10630;90102	ITGA5;SPOCK1;CDK6;CDH13;THBS1;FN1;SERPINE1;NID1;PHLDB2;PLAU;PDPN;COL1A1;EDIL3;COL8A1	geneontology_Biological_Process
48	GO:0001503	ossification	http://amigo.geneontology.org/amigo/term/GO:0001503	295	18	3.40217	5.29074	6.51451e-09	1.84393e-06	374;1009;1021;1277;1290;1291;1301;1462;1956;2201;3371;4313;4322;5744;6423;6678;6696;22943	CDK6;TNC;CDH11;DKK1;COL5A2;PTHLH;VCAN;EGFR;FBN2;COL11A1;COL1A1;SPARC;MMP2;COL6A1;SFRP2;SPP1;MMP13;AREG	geneontology_Biological_Process
49	GO:0007178	transmembrane receptor protein serine/threonine kinase signaling pathway	http://amigo.geneontology.org/amigo/term/GO:0007178	262	17	3.02159	5.62618	7.13838e-09	1.9243e-06	857;1278;1281;2200;2201;3624;3625;3688;6423;7057;10468;10979;11167;22943;23089;27122;56937	THBS1;DKK3;FERMT2;ITGB1;INHBA;FSTL1;DKK1;PMEPA1;CAV1;INHBB;FBN2;COL3A1;COL1A2;FST;SFRP2;FBN1;PEG10	geneontology_Biological_Process
50	GO:0048598	embryonic morphogenesis	http://amigo.geneontology.org/amigo/term/GO:0048598	427	21	4.92449	4.2644	1.46624e-08	3.77291e-06	1284;1289;1290;1291;1295;1301;2200;2201;2335;3624;3678;3688;3909;3914;4237;4313;6423;7424;8091;22943;90102	ITGA5;FN1;ITGB1;INHBA;COL4A2;HMGA2;PHLDB2;COL5A1;DKK1;LAMA3;MFAP2;COL5A2;LAMB3;FBN2;COL11A1;MMP2;COL6A1;VEGFC;COL8A1;SFRP2;FBN1	geneontology_Biological_Process
51	GO:0007160	cell-matrix adhesion	http://amigo.geneontology.org/amigo/term/GO:0007160	183	14	2.1105	6.63351	2.13445e-08	5.25352e-06	87;1012;1021;1281;2335;3688;4811;5054;5328;7057;8910;10979;22795;90102	ACTN1;CDK6;CDH13;THBS1;FN1;FERMT2;SERPINE1;ITGB1;NID1;PHLDB2;SGCE;PLAU;NID2;COL3A1	geneontology_Biological_Process
52	GO:0007044	cell-substrate junction assembly	http://amigo.geneontology.org/amigo/term/GO:0007044	85	10	0.980286	10.2011	4.2731e-08	1.00792e-05	87;2335;3678;3909;3914;3915;3918;7057;10979;90102	ITGA5;ACTN1;LAMC1;THBS1;FN1;FERMT2;PHLDB2;LAMC2;LAMA3;LAMB3	geneontology_Biological_Process
53	GO:0022617	extracellular matrix disassembly	http://amigo.geneontology.org/amigo/term/GO:0022617	65	9	0.74963	12.0059	4.92472e-08	1.11515e-05	2191;3915;4312;4313;4316;4319;4320;4322;10630	LAMC1;FAP;PDPN;MMP2;MMP7;MMP13;MMP10;MMP11;MMP1	geneontology_Biological_Process
54	GO:0030193	regulation of blood coagulation	http://amigo.geneontology.org/amigo/term/GO:0030193	67	9	0.772696	11.6475	6.46151e-08	1.40687e-05	857;2150;2152;2191;5054;5270;5328;7057;10630	THBS1;SERPINE1;FAP;PLAU;CAV1;PDPN;F2RL1;SERPINE2;F3	geneontology_Biological_Process
55	GO:1900046	regulation of hemostasis	http://amigo.geneontology.org/amigo/term/GO:1900046	68	9	0.784229	11.4762	7.37581e-08	1.54646e-05	857;2150;2152;2191;5054;5270;5328;7057;10630	THBS1;SERPINE1;FAP;PLAU;CAV1;PDPN;F2RL1;SERPINE2;F3	geneontology_Biological_Process
56	GO:0050818	regulation of coagulation	http://amigo.geneontology.org/amigo/term/GO:0050818	69	9	0.795761	11.3099	8.4009e-08	1.69848e-05	857;2150;2152;2191;5054;5270;5328;7057;10630	THBS1;SERPINE1;FAP;PLAU;CAV1;PDPN;F2RL1;SERPINE2;F3	geneontology_Biological_Process
57	GO:0071559	response to transforming growth factor beta	http://amigo.geneontology.org/amigo/term/GO:0071559	205	14	2.36422	5.92162	8.95387e-08	1.74786e-05	857;1277;1278;1281;1284;2200;2201;3688;7057;10979;23089;25878;27122;56937	THBS1;DKK3;FERMT2;ITGB1;COL4A2;PMEPA1;CAV1;MXRA5;FBN2;COL1A1;COL3A1;COL1A2;FBN1;PEG10	geneontology_Biological_Process
58	GO:0034330	cell junction organization	http://amigo.geneontology.org/amigo/term/GO:0034330	240	15	2.76787	5.41934	9.70628e-08	1.83157e-05	87;857;1009;1012;1829;2150;2335;3678;3909;3914;3915;3918;7057;10979;90102	ITGA5;ACTN1;LAMC1;CDH13;THBS1;DSG2;FN1;FERMT2;PHLDB2;CDH11;LAMC2;LAMA3;CAV1;LAMB3;F2RL1	geneontology_Biological_Process
59	GO:1903034	regulation of response to wounding	http://amigo.geneontology.org/amigo/term/GO:1903034	129	11	1.48773	7.39382	2.53347e-07	4.62645e-05	857;2150;2152;2191;5054;5270;5328;6696;7057;10630;90102	THBS1;SERPINE1;FAP;PHLDB2;PLAU;CAV1;PDPN;F2RL1;SERPINE2;SPP1;F3	geneontology_Biological_Process
60	GO:0050673	epithelial cell proliferation	http://amigo.geneontology.org/amigo/term/GO:0050673	303	16	3.49443	4.57871	3.56578e-07	6.30809e-05	374;595;857;1012;1021;1295;1948;1956;2152;2191;3915;4017;6423;6678;7057;7424	LAMC1;LOXL2;CDK6;CDH13;THBS1;EFNB2;FAP;CAV1;EGFR;SPARC;CCND1;VEGFC;COL8A1;SFRP2;F3;AREG	geneontology_Biological_Process
61	GO:0061041	regulation of wound healing	http://amigo.geneontology.org/amigo/term/GO:0061041	109	10	1.25707	7.95499	4.61872e-07	7.63975e-05	857;2150;2152;2191;5054;5270;5328;7057;10630;90102	THBS1;SERPINE1;FAP;PHLDB2;PLAU;CAV1;PDPN;F2RL1;SERPINE2;F3	geneontology_Biological_Process
62	GO:0071560	cellular response to transforming growth factor beta stimulus	http://amigo.geneontology.org/amigo/term/GO:0071560	200	13	2.30655	5.63611	4.716e-07	7.63975e-05	857;1277;1278;1281;1284;2200;2201;3688;7057;10979;23089;27122;56937	THBS1;DKK3;FERMT2;ITGB1;COL4A2;PMEPA1;CAV1;FBN2;COL1A1;COL3A1;COL1A2;FBN1;PEG10	geneontology_Biological_Process
63	GO:0043200	response to amino acid	http://amigo.geneontology.org/amigo/term/GO:0043200	84	9	0.968753	9.29029	4.72339e-07	7.63975e-05	1277;1278;1281;1282;1290;1291;1956;4313;56034	COL4A1;PDGFC;COL5A2;EGFR;COL1A1;COL3A1;MMP2;COL6A1;COL1A2	geneontology_Biological_Process
64	GO:0030335	positive regulation of cell migration	http://amigo.geneontology.org/amigo/term/GO:0030335	393	18	4.53238	3.97142	5.1295e-07	8.06615e-05	857;1012;1277;1956;2150;2152;2335;3678;3918;5054;5328;6678;7057;7130;7424;10512;10630;56034	ITGA5;CDH13;THBS1;FN1;SERPINE1;PDGFC;LAMC2;TNFAIP6;PLAU;CAV1;PDPN;F2RL1;SEMA3C;EGFR;COL1A1;SPARC;VEGFC;F3	geneontology_Biological_Process
65	GO:0002062	chondrocyte differentiation	http://amigo.geneontology.org/amigo/term/GO:0002062	86	9	0.991819	9.07424	5.78771e-07	8.8552e-05	871;1291;1293;1301;4017;5744;6423;7045;8091	SERPINH1;LOXL2;HMGA2;TGFBI;PTHLH;COL11A1;COL6A3;COL6A1;SFRP2	geneontology_Biological_Process
66	GO:0034329	cell junction assembly	http://amigo.geneontology.org/amigo/term/GO:0034329	205	13	2.36422	5.49864	6.25685e-07	9.32105e-05	87;857;1009;1012;2335;3678;3909;3914;3915;3918;7057;10979;90102	ITGA5;ACTN1;LAMC1;CDH13;THBS1;FN1;FERMT2;PHLDB2;CDH11;LAMC2;LAMA3;CAV1;LAMB3	geneontology_Biological_Process
67	GO:0090092	regulation of transmembrane receptor protein serine/threonine kinase signaling pathway	http://amigo.geneontology.org/amigo/term/GO:0090092	175	12	2.01824	5.94579	7.57218e-07	0.000108626	857;2200;2201;3624;3625;6423;7057;10468;22943;23089;27122;56937	THBS1;DKK3;INHBA;DKK1;PMEPA1;CAV1;INHBB;FBN2;FST;SFRP2;FBN1;PEG10	geneontology_Biological_Process
68	GO:2000147	positive regulation of cell motility	http://amigo.geneontology.org/amigo/term/GO:2000147	404	18	4.65924	3.86329	7.67537e-07	0.000108626	857;1012;1277;1956;2150;2152;2335;3678;3918;5054;5328;6678;7057;7130;7424;10512;10630;56034	ITGA5;CDH13;THBS1;FN1;SERPINE1;PDGFC;LAMC2;TNFAIP6;PLAU;CAV1;PDPN;F2RL1;SEMA3C;EGFR;COL1A1;SPARC;VEGFC;F3	geneontology_Biological_Process
69	GO:0002063	chondrocyte development	http://amigo.geneontology.org/amigo/term/GO:0002063	30	6	0.345983	17.3419	9.79838e-07	0.000135289	871;1291;1293;1301;5744;6423	SERPINH1;PTHLH;COL11A1;COL6A3;COL6A1;SFRP2	geneontology_Biological_Process
70	GO:0051272	positive regulation of cellular component movement	http://amigo.geneontology.org/amigo/term/GO:0051272	413	18	4.76304	3.7791	1.05624e-06	0.000142366	857;1012;1277;1956;2150;2152;2335;3678;3918;5054;5328;6678;7057;7130;7424;10512;10630;56034	ITGA5;CDH13;THBS1;FN1;SERPINE1;PDGFC;LAMC2;TNFAIP6;PLAU;CAV1;PDPN;F2RL1;SEMA3C;EGFR;COL1A1;SPARC;VEGFC;F3	geneontology_Biological_Process
71	GO:0051216	cartilage development	http://amigo.geneontology.org/amigo/term/GO:0051216	152	11	1.75298	6.27502	1.32002e-06	0.000173782	871;1277;1291;1293;1301;4017;4322;5744;6423;7045;8091	SERPINH1;LOXL2;HMGA2;TGFBI;PTHLH;COL11A1;COL1A1;COL6A3;COL6A1;SFRP2;MMP13	geneontology_Biological_Process
72	GO:0007179	transforming growth factor beta receptor signaling pathway	http://amigo.geneontology.org/amigo/term/GO:0007179	157	11	1.81065	6.07518	1.8175e-06	0.000233838	857;1278;1281;2200;2201;3688;7057;10979;23089;27122;56937	THBS1;DKK3;FERMT2;ITGB1;PMEPA1;CAV1;FBN2;COL3A1;COL1A2;FBN1;PEG10	geneontology_Biological_Process
73	GO:0040017	positive regulation of locomotion	http://amigo.geneontology.org/amigo/term/GO:0040017	430	18	4.95909	3.6297	1.88453e-06	0.000237074	857;1012;1277;1956;2150;2152;2335;3678;3918;5054;5328;6678;7057;7130;7424;10512;10630;56034	ITGA5;CDH13;THBS1;FN1;SERPINE1;PDGFC;LAMC2;TNFAIP6;PLAU;CAV1;PDPN;F2RL1;SEMA3C;EGFR;COL1A1;SPARC;VEGFC;F3	geneontology_Biological_Process
74	GO:0060537	muscle tissue development	http://amigo.geneontology.org/amigo/term/GO:0060537	308	15	3.55209	4.22286	2.35493e-06	0.000286844	58;70;857;1281;1301;1829;1948;3688;4628;7168;8910;9242;10512;22943;26508	MYH10;DSG2;EFNB2;HEYL;ITGB1;TPM1;DKK1;SGCE;MSC;CAV1;SEMA3C;COL11A1;COL3A1;ACTC1;ACTA1	geneontology_Biological_Process
75	GO:0061448	connective tissue development	http://amigo.geneontology.org/amigo/term/GO:0061448	195	12	2.24889	5.33596	2.3815e-06	0.000286844	871;1277;1289;1291;1293;1301;4017;4322;5744;6423;7045;8091	SERPINH1;LOXL2;HMGA2;COL5A1;TGFBI;PTHLH;COL11A1;COL1A1;COL6A3;COL6A1;SFRP2;MMP13	geneontology_Biological_Process
76	GO:0038063	collagen-activated tyrosine kinase receptor signaling pathway	http://amigo.geneontology.org/amigo/term/GO:0038063	10	4	0.115328	34.6838	3.34502e-06	0.000394504	1277;1282;1284;1288	COL4A1;COL4A2;COL4A6;COL1A1	geneontology_Biological_Process
77	GO:0090101	negative regulation of transmembrane receptor protein serine/threonine kinase signaling pathway	http://amigo.geneontology.org/amigo/term/GO:0090101	83	8	0.95722	8.35753	4.72099e-06	0.000545418	857;2200;2201;6423;10468;22943;23089;56937	DKK1;PMEPA1;CAV1;FBN2;FST;SFRP2;FBN1;PEG10	geneontology_Biological_Process
78	GO:0007596	blood coagulation	http://amigo.geneontology.org/amigo/term/GO:0007596	286	14	3.29837	4.24452	4.94999e-06	0.000560438	87;857;1277;1278;1281;2150;2152;2191;5054;5270;5328;7057;7980;10630	ACTN1;THBS1;SERPINE1;FAP;PLAU;CAV1;PDPN;F2RL1;SERPINE2;COL1A1;COL3A1;COL1A2;TFPI2;F3	geneontology_Biological_Process
79	GO:0050817	coagulation	http://amigo.geneontology.org/amigo/term/GO:0050817	289	14	3.33297	4.20046	5.58429e-06	0.000619856	87;857;1277;1278;1281;2150;2152;2191;5054;5270;5328;7057;7980;10630	ACTN1;THBS1;SERPINE1;FAP;PLAU;CAV1;PDPN;F2RL1;SERPINE2;COL1A1;COL3A1;COL1A2;TFPI2;F3	geneontology_Biological_Process
80	GO:0007599	hemostasis	http://amigo.geneontology.org/amigo/term/GO:0007599	291	14	3.35604	4.17159	6.04636e-06	0.000658239	87;857;1277;1278;1281;2150;2152;2191;5054;5270;5328;7057;7980;10630	ACTN1;THBS1;SERPINE1;FAP;PLAU;CAV1;PDPN;F2RL1;SERPINE2;COL1A1;COL3A1;COL1A2;TFPI2;F3	geneontology_Biological_Process
81	GO:0014706	striated muscle tissue development	http://amigo.geneontology.org/amigo/term/GO:0014706	296	14	3.4137	4.10112	7.35361e-06	0.000785449	58;70;857;1301;1829;1948;3688;4628;7168;8910;9242;10512;22943;26508	MYH10;DSG2;EFNB2;HEYL;ITGB1;TPM1;DKK1;SGCE;MSC;CAV1;SEMA3C;COL11A1;ACTC1;ACTA1	geneontology_Biological_Process
82	GO:0031581	hemidesmosome assembly	http://amigo.geneontology.org/amigo/term/GO:0031581	12	4	0.138393	28.9031	7.74502e-06	0.000811936	3909;3914;3915;3918	LAMC1;LAMC2;LAMA3;LAMB3	geneontology_Biological_Process
83	GO:1904018	positive regulation of vasculature development	http://amigo.geneontology.org/amigo/term/GO:1904018	150	10	1.72992	5.78063	8.53181e-06	0.000878156	1948;2152;3678;3688;5054;6423;7057;7424;8038;8091	ITGA5;THBS1;EFNB2;SERPINE1;ITGB1;HMGA2;ADAM12;VEGFC;SFRP2;F3	geneontology_Biological_Process
84	GO:1901342	regulation of vasculature development	http://amigo.geneontology.org/amigo/term/GO:1901342	262	13	3.02159	4.30237	9.54766e-06	0.000965166	1284;1948;2152;3678;3688;5054;6423;6678;7057;7058;7424;8038;8091	ITGA5;THBS1;EFNB2;SERPINE1;ITGB1;COL4A2;HMGA2;ADAM12;SPARC;VEGFC;SFRP2;THBS2;F3	geneontology_Biological_Process
85	GO:0048333	mesodermal cell differentiation	http://amigo.geneontology.org/amigo/term/GO:0048333	26	5	0.299852	16.6749	1.01486e-05	0.00100792	3624;3688;6423;8091;22943	ITGB1;INHBA;HMGA2;DKK1;SFRP2	geneontology_Biological_Process
86	GO:0038065	collagen-activated signaling pathway	http://amigo.geneontology.org/amigo/term/GO:0038065	13	4	0.149926	26.6798	1.10878e-05	0.0010822	1277;1282;1284;1288	COL4A1;COL4A2;COL4A6;COL1A1	geneontology_Biological_Process
87	GO:0071229	cellular response to acid chemical	http://amigo.geneontology.org/amigo/term/GO:0071229	161	10	1.85678	5.38568	1.59076e-05	0.00152108	1277;1278;1281;1282;1290;1291;1956;3371;4313;56034	COL4A1;TNC;PDGFC;COL5A2;EGFR;COL1A1;COL3A1;MMP2;COL6A1;COL1A2	geneontology_Biological_Process
88	GO:0045765	regulation of angiogenesis	http://amigo.geneontology.org/amigo/term/GO:0045765	235	12	2.7102	4.42771	1.61216e-05	0.00152108	1284;2152;3678;3688;5054;6423;6678;7057;7058;7424;8038;8091	ITGA5;THBS1;SERPINE1;ITGB1;COL4A2;HMGA2;ADAM12;SPARC;VEGFC;SFRP2;THBS2;F3	geneontology_Biological_Process
89	GO:0018149	peptide cross-linking	http://amigo.geneontology.org/amigo/term/GO:0018149	29	5	0.33445	14.9499	1.78225e-05	0.00165398	633;1281;2335;7052;7057	THBS1;FN1;COL3A1;TGM2;BGN	geneontology_Biological_Process
90	GO:0010470	regulation of gastrulation	http://amigo.geneontology.org/amigo/term/GO:0010470	30	5	0.345983	14.4516	2.1191e-05	0.00189758	1289;1290;6423;22943;90102	PHLDB2;COL5A1;DKK1;COL5A2;SFRP2	geneontology_Biological_Process
91	GO:0090287	regulation of cellular response to growth factor stimulus	http://amigo.geneontology.org/amigo/term/GO:0090287	203	11	2.34115	4.69854	2.13808e-05	0.00189758	857;2200;2201;3678;6423;7057;7424;22943;23089;27122;56937	ITGA5;THBS1;DKK3;DKK1;PMEPA1;CAV1;FBN2;VEGFC;SFRP2;FBN1;PEG10	geneontology_Biological_Process
92	GO:0010469	regulation of signaling receptor activity	http://amigo.geneontology.org/amigo/term/GO:0010469	416	16	4.79763	3.33498	2.14529e-05	0.00189758	374;1114;2200;3624;3625;3688;5054;5328;5744;6423;6696;7424;8614;22943;26508;56034	STC2;HEYL;SERPINE1;ITGB1;INHBA;PDGFC;DKK1;PLAU;PTHLH;INHBB;VEGFC;SFRP2;FBN1;SPP1;CHGB;AREG	geneontology_Biological_Process
93	GO:1903035	negative regulation of response to wounding	http://amigo.geneontology.org/amigo/term/GO:1903035	75	7	0.864958	8.09288	2.35335e-05	0.00201853	2191;5054;5270;5328;6696;7057;90102	THBS1;SERPINE1;FAP;PHLDB2;PLAU;SERPINE2;SPP1	geneontology_Biological_Process
94	GO:0033273	response to vitamin	http://amigo.geneontology.org/amigo/term/GO:0033273	75	7	0.864958	8.09288	2.35335e-05	0.00201853	595;1277;1956;3371;6678;6696;8614	STC2;TNC;EGFR;COL1A1;SPARC;CCND1;SPP1	geneontology_Biological_Process
95	GO:0001649	osteoblast differentiation	http://amigo.geneontology.org/amigo/term/GO:0001649	169	10	1.94904	5.13073	2.42489e-05	0.0020441	374;1021;1277;1291;1462;2201;3371;5744;6423;6696	CDK6;TNC;PTHLH;VCAN;FBN2;COL1A1;COL6A1;SFRP2;SPP1;AREG	geneontology_Biological_Process
96	GO:0045766	positive regulation of angiogenesis	http://amigo.geneontology.org/amigo/term/GO:0045766	135	9	1.55692	5.78063	2.45537e-05	0.0020441	2152;3678;3688;5054;6423;7057;7424;8038;8091	ITGA5;THBS1;SERPINE1;ITGB1;HMGA2;ADAM12;VEGFC;SFRP2;F3	geneontology_Biological_Process
97	GO:0060485	mesenchyme development	http://amigo.geneontology.org/amigo/term/GO:0060485	209	11	2.41035	4.56365	2.80228e-05	0.00229909	58;70;1277;2335;4017;6423;8091;10512;10630;26508;90102	LOXL2;FN1;HEYL;HMGA2;PHLDB2;PDPN;SEMA3C;COL1A1;SFRP2;ACTC1;ACTA1	geneontology_Biological_Process
98	GO:0090288	negative regulation of cellular response to growth factor stimulus	http://amigo.geneontology.org/amigo/term/GO:0090288	107	8	1.23401	6.48295	3.10083e-05	0.00250768	857;2200;2201;6423;7057;22943;23089;56937	THBS1;DKK1;PMEPA1;CAV1;FBN2;SFRP2;FBN1;PEG10	geneontology_Biological_Process
99	GO:0007507	heart development	http://amigo.geneontology.org/amigo/term/GO:0007507	431	16	4.97063	3.21891	3.30657e-05	0.00263641	70;1281;1289;1301;1829;1948;1956;2200;3688;4628;6423;6678;7168;10512;22943;26508	MYH10;DSG2;EFNB2;HEYL;ITGB1;TPM1;COL5A1;DKK1;SEMA3C;EGFR;COL11A1;SPARC;COL3A1;SFRP2;FBN1;ACTC1	geneontology_Biological_Process
100	GO:0002009	morphogenesis of an epithelium	http://amigo.geneontology.org/amigo/term/GO:0002009	385	15	4.44012	3.37829	3.41959e-05	0.00268865	374;1282;1289;1948;1956;2239;3371;3678;6423;7052;7424;10512;10630;22943;90102	ITGA5;EFNB2;COL4A1;TNC;PHLDB2;COL5A1;DKK1;PDPN;SEMA3C;EGFR;GPC4;TGM2;VEGFC;SFRP2;AREG	geneontology_Biological_Process
101	GO:1900115	extracellular regulation of signal transduction	http://amigo.geneontology.org/amigo/term/GO:1900115	17	4	0.196057	20.4022	3.5613e-05	0.00272439	2200;2201;22943;27122	DKK3;DKK1;FBN2;FBN1	geneontology_Biological_Process
102	GO:1900116	extracellular negative regulation of signal transduction	http://amigo.geneontology.org/amigo/term/GO:1900116	17	4	0.196057	20.4022	3.5613e-05	0.00272439	2200;2201;22943;27122	DKK3;DKK1;FBN2;FBN1	geneontology_Biological_Process
103	GO:0033627	cell adhesion mediated by integrin	http://amigo.geneontology.org/amigo/term/GO:0033627	56	6	0.645835	9.29029	4.19759e-05	0.00316834	2200;3678;3688;5054;5328;6423	ITGA5;SERPINE1;ITGB1;PLAU;SFRP2;FBN1	geneontology_Biological_Process
104	GO:0050678	regulation of epithelial cell proliferation	http://amigo.geneontology.org/amigo/term/GO:0050678	261	12	3.01005	3.98664	4.54685e-05	0.0033868	595;857;1012;1021;1948;1956;2152;3915;6423;6678;7057;7424	LAMC1;CDK6;CDH13;THBS1;EFNB2;CAV1;EGFR;SPARC;CCND1;VEGFC;SFRP2;F3	geneontology_Biological_Process
105	GO:0060348	bone development	http://amigo.geneontology.org/amigo/term/GO:0060348	148	9	1.70685	5.27287	5.07944e-05	0.00373438	871;1277;1291;1293;2200;4322;6423;6678;56034	SERPINH1;PDGFC;COL1A1;SPARC;COL6A3;COL6A1;SFRP2;FBN1;MMP13	geneontology_Biological_Process
106	GO:0060351	cartilage development involved in endochondral bone morphogenesis	http://amigo.geneontology.org/amigo/term/GO:0060351	36	5	0.41518	12.043	5.30494e-05	0.00385017	871;1277;1291;1293;4322	SERPINH1;COL1A1;COL6A3;COL6A1;MMP13	geneontology_Biological_Process
107	GO:0007517	muscle organ development	http://amigo.geneontology.org/amigo/term/GO:0007517	310	13	3.57516	3.6362	5.60933e-05	0.00401955	58;70;165;857;1281;1293;1301;1948;7168;8910;9242;22943;26508	EFNB2;HEYL;TPM1;DKK1;SGCE;MSC;CAV1;COL11A1;COL6A3;COL3A1;AEBP1;ACTC1;ACTA1	geneontology_Biological_Process
108	GO:0045992	negative regulation of embryonic development	http://amigo.geneontology.org/amigo/term/GO:0045992	19	4	0.219123	18.2546	5.6973e-05	0.00403155	1289;1290;6423;22943	COL5A1;DKK1;COL5A2;SFRP2	geneontology_Biological_Process
109	GO:0001101	response to acid chemical	http://amigo.geneontology.org/amigo/term/GO:0001101	268	12	3.09078	3.88251	5.87782e-05	0.00410794	1277;1278;1281;1282;1290;1291;1956;3371;4313;6678;22943;56034	COL4A1;TNC;PDGFC;DKK1;COL5A2;EGFR;COL1A1;SPARC;COL3A1;MMP2;COL6A1;COL1A2	geneontology_Biological_Process
110	GO:0006027	glycosaminoglycan catabolic process	http://amigo.geneontology.org/amigo/term/GO:0006027	37	5	0.426713	11.7175	6.07772e-05	0.00419585	633;1462;1464;2239;6383	SDC2;VCAN;GPC4;BGN;CSPG4	geneontology_Biological_Process
111	GO:0031639	plasminogen activation	http://amigo.geneontology.org/amigo/term/GO:0031639	20	4	0.230655	17.3419	7.05842e-05	0.00481418	5054;5270;5328;7057	THBS1;SERPINE1;PLAU;SERPINE2	geneontology_Biological_Process
112	GO:0030048	actin filament-based movement	http://amigo.geneontology.org/amigo/term/GO:0030048	121	8	1.39547	5.73285	7.48743e-05	0.00504599	58;70;857;1674;1829;4628;7168;10630	MYH10;DSG2;TPM1;CAV1;PDPN;ACTC1;DES;ACTA1	geneontology_Biological_Process
113	GO:0006026	aminoglycan catabolic process	http://amigo.geneontology.org/amigo/term/GO:0006026	39	5	0.449778	11.1166	7.88159e-05	0.00524914	633;1462;1464;2239;6383	SDC2;VCAN;GPC4;BGN;CSPG4	geneontology_Biological_Process
114	GO:0017015	regulation of transforming growth factor beta receptor signaling pathway	http://amigo.geneontology.org/amigo/term/GO:0017015	91	7	1.04948	6.66995	8.24566e-05	0.00542776	857;2200;2201;7057;23089;27122;56937	THBS1;DKK3;PMEPA1;CAV1;FBN2;FBN1;PEG10	geneontology_Biological_Process
115	GO:0030194	positive regulation of blood coagulation	http://amigo.geneontology.org/amigo/term/GO:0030194	21	4	0.242188	16.5161	8.64187e-05	0.00555928	2152;5054;7057;10630	THBS1;SERPINE1;PDPN;F3	geneontology_Biological_Process
116	GO:1900048	positive regulation of hemostasis	http://amigo.geneontology.org/amigo/term/GO:1900048	21	4	0.242188	16.5161	8.64187e-05	0.00555928	2152;5054;7057;10630	THBS1;SERPINE1;PDPN;F3	geneontology_Biological_Process
117	GO:1903844	regulation of cellular response to transforming growth factor beta stimulus	http://amigo.geneontology.org/amigo/term/GO:1903844	93	7	1.07255	6.52651	9.46996e-05	0.00602353	857;2200;2201;7057;23089;27122;56937	THBS1;DKK3;PMEPA1;CAV1;FBN2;FBN1;PEG10	geneontology_Biological_Process
118	GO:0050878	regulation of body fluid levels	http://amigo.geneontology.org/amigo/term/GO:0050878	422	15	4.86683	3.08209	9.71189e-05	0.00610878	87;595;857;1277;1278;1281;2150;2152;2191;5054;5270;5328;7057;7980;10630	ACTN1;THBS1;SERPINE1;FAP;PLAU;CAV1;PDPN;F2RL1;SERPINE2;COL1A1;COL3A1;CCND1;COL1A2;TFPI2;F3	geneontology_Biological_Process
119	GO:0050927	positive regulation of positive chemotaxis	http://amigo.geneontology.org/amigo/term/GO:0050927	22	4	0.253721	15.7653	0.000104686	0.00644161	1012;2150;2152;7424	CDH13;F2RL1;VEGFC;F3	geneontology_Biological_Process
120	GO:0050820	positive regulation of coagulation	http://amigo.geneontology.org/amigo/term/GO:0050820	22	4	0.253721	15.7653	0.000104686	0.00644161	2152;5054;7057;10630	THBS1;SERPINE1;PDPN;F3	geneontology_Biological_Process
121	GO:0002040	sprouting angiogenesis	http://amigo.geneontology.org/amigo/term/GO:0002040	95	7	1.09561	6.38911	0.000108385	0.00659749	1012;1948;3678;3688;4017;7057;7424	ITGA5;LOXL2;CDH13;THBS1;EFNB2;ITGB1;VEGFC	geneontology_Biological_Process
122	GO:0090130	tissue migration	http://amigo.geneontology.org/amigo/term/GO:0090130	244	11	2.814	3.90903	0.000114114	0.00686337	58;70;1012;1948;2191;3688;4017;5217;6678;7057;7424	LOXL2;CDH13;THBS1;EFNB2;FAP;ITGB1;PFN2;SPARC;VEGFC;ACTC1;ACTA1	geneontology_Biological_Process
123	GO:0010811	positive regulation of cell-substrate adhesion	http://amigo.geneontology.org/amigo/term/GO:0010811	96	7	1.10715	6.32256	0.000115807	0.00686337	1012;1021;1295;2335;3678;4811;10085	ITGA5;CDK6;CDH13;FN1;NID1;EDIL3;COL8A1	geneontology_Biological_Process
124	GO:0061045	negative regulation of wound healing	http://amigo.geneontology.org/amigo/term/GO:0061045	67	6	0.772696	7.76502	0.00011639	0.00686337	2191;5054;5270;5328;7057;90102	THBS1;SERPINE1;FAP;PHLDB2;PLAU;SERPINE2	geneontology_Biological_Process
125	GO:0050926	regulation of positive chemotaxis	http://amigo.geneontology.org/amigo/term/GO:0050926	23	4	0.265254	15.0799	0.000125602	0.00732499	1012;2150;2152;7424	CDH13;F2RL1;VEGFC;F3	geneontology_Biological_Process
126	GO:0045785	positive regulation of cell adhesion	http://amigo.geneontology.org/amigo/term/GO:0045785	336	13	3.87501	3.35483	0.000126806	0.00732499	857;1012;1021;1295;1948;2335;3678;4811;6423;7052;7168;10085;10630	ITGA5;CDK6;CDH13;FN1;EFNB2;NID1;TPM1;CAV1;PDPN;EDIL3;TGM2;COL8A1;SFRP2	geneontology_Biological_Process
127	GO:0009612	response to mechanical stimulus	http://amigo.geneontology.org/amigo/term/GO:0009612	168	9	1.93751	4.64515	0.000135169	0.00772919	58;1277;1281;1301;1956;3371;4316;5270;7057	THBS1;TNC;SERPINE2;EGFR;COL11A1;COL1A1;COL3A1;MMP7;ACTA1	geneontology_Biological_Process
128	GO:0048762	mesenchymal cell differentiation	http://amigo.geneontology.org/amigo/term/GO:0048762	169	9	1.94904	4.61766	0.000141408	0.0080051	1277;2335;4017;6423;8091;10512;10630;26508;90102	LOXL2;FN1;HEYL;HMGA2;PHLDB2;PDPN;SEMA3C;COL1A1;SFRP2	geneontology_Biological_Process
129	GO:0070252	actin-mediated cell contraction	http://amigo.geneontology.org/amigo/term/GO:0070252	101	7	1.16481	6.00956	0.000159384	0.00893337	58;70;857;1674;1829;7168;10630	DSG2;TPM1;CAV1;PDPN;ACTC1;DES;ACTA1	geneontology_Biological_Process
130	GO:0010755	regulation of plasminogen activation	http://amigo.geneontology.org/amigo/term/GO:0010755	10	3	0.115328	26.0128	0.00016912	0.00920568	5054;5270;7057	THBS1;SERPINE1;SERPINE2	geneontology_Biological_Process
131	GO:0030207	chondroitin sulfate catabolic process	http://amigo.geneontology.org/amigo/term/GO:0030207	10	3	0.115328	26.0128	0.00016912	0.00920568	633;1462;1464	VCAN;BGN;CSPG4	geneontology_Biological_Process
132	GO:0070208	protein heterotrimerization	http://amigo.geneontology.org/amigo/term/GO:0070208	10	3	0.115328	26.0128	0.00016912	0.00920568	1277;1278;1291	COL1A1;COL6A1;COL1A2	geneontology_Biological_Process
133	GO:2001238	positive regulation of extrinsic apoptotic signaling pathway	http://amigo.geneontology.org/amigo/term/GO:2001238	46	5	0.530508	9.42493	0.000175964	0.00932556	857;3624;7057;7078;8406	SRPX;THBS1;INHBA;CAV1;TIMP3	geneontology_Biological_Process
134	GO:0044319	wound healing, spreading of cells	http://amigo.geneontology.org/amigo/term/GO:0044319	25	4	0.288319	13.8735	0.000176265	0.00932556	1289;3678;10630;90102	ITGA5;PHLDB2;COL5A1;PDPN	geneontology_Biological_Process
135	GO:0090505	epiboly involved in wound healing	http://amigo.geneontology.org/amigo/term/GO:0090505	25	4	0.288319	13.8735	0.000176265	0.00932556	1289;3678;10630;90102	ITGA5;PHLDB2;COL5A1;PDPN	geneontology_Biological_Process
136	GO:0010951	negative regulation of endopeptidase activity	http://amigo.geneontology.org/amigo/term/GO:0010951	176	9	2.02977	4.434	0.000192191	0.010074	871;1293;5054;5270;6423;6695;7057;7078;7980	SERPINH1;SPOCK1;THBS1;SERPINE1;TIMP3;SERPINE2;COL6A3;SFRP2;TFPI2	geneontology_Biological_Process
137	GO:0048705	skeletal system morphogenesis	http://amigo.geneontology.org/amigo/term/GO:0048705	177	9	2.0413	4.40895	0.000200553	0.0104159	871;1277;1291;1293;1301;2201;4313;4322;6423	SERPINH1;FBN2;COL11A1;COL1A1;COL6A3;MMP2;COL6A1;SFRP2;MMP13	geneontology_Biological_Process
138	GO:0002576	platelet degranulation	http://amigo.geneontology.org/amigo/term/GO:0002576	105	7	1.21094	5.78063	0.00020308	0.0104512	87;2335;5054;6678;7057;7078;7424	ACTN1;THBS1;FN1;SERPINE1;TIMP3;SPARC;VEGFC	geneontology_Biological_Process
139	GO:0090504	epiboly	http://amigo.geneontology.org/amigo/term/GO:0090504	26	4	0.299852	13.3399	0.000206468	0.0105299	1289;3678;10630;90102	ITGA5;PHLDB2;COL5A1;PDPN	geneontology_Biological_Process
140	GO:0030195	negative regulation of blood coagulation	http://amigo.geneontology.org/amigo/term/GO:0030195	48	5	0.553573	9.03223	0.000215813	0.0108116	2191;5054;5270;5328;7057	THBS1;SERPINE1;FAP;PLAU;SERPINE2	geneontology_Biological_Process
141	GO:0006024	glycosaminoglycan biosynthetic process	http://amigo.geneontology.org/amigo/term/GO:0006024	48	5	0.553573	9.03223	0.000215813	0.0108116	633;1462;1464;2239;6383	SDC2;VCAN;GPC4;BGN;CSPG4	geneontology_Biological_Process
142	GO:0010466	negative regulation of peptidase activity	http://amigo.geneontology.org/amigo/term/GO:0010466	180	9	2.0759	4.33547	0.000227479	0.0110741	871;1293;5054;5270;6423;6695;7057;7078;7980	SERPINH1;SPOCK1;THBS1;SERPINE1;TIMP3;SERPINE2;COL6A3;SFRP2;TFPI2	geneontology_Biological_Process
143	GO:0030206	chondroitin sulfate biosynthetic process	http://amigo.geneontology.org/amigo/term/GO:0030206	11	3	0.126861	23.648	0.000230587	0.0110741	633;1462;1464	VCAN;BGN;CSPG4	geneontology_Biological_Process
144	GO:0050650	chondroitin sulfate proteoglycan biosynthetic process	http://amigo.geneontology.org/amigo/term/GO:0050650	11	3	0.126861	23.648	0.000230587	0.0110741	633;1462;1464	VCAN;BGN;CSPG4	geneontology_Biological_Process
145	GO:0061430	bone trabecula morphogenesis	http://amigo.geneontology.org/amigo/term/GO:0061430	11	3	0.126861	23.648	0.000230587	0.0110741	1277;2201;4313	FBN2;COL1A1;MMP2	geneontology_Biological_Process
146	GO:0050900	leukocyte migration	http://amigo.geneontology.org/amigo/term/GO:0050900	357	13	4.1172	3.15749	0.000230833	0.0110741	857;1277;1278;2150;2335;3678;3688;4312;5054;6383;7057;7424;23428	ITGA5;THBS1;FN1;SERPINE1;ITGB1;SDC2;CAV1;F2RL1;SLC7A8;COL1A1;COL1A2;VEGFC;MMP1	geneontology_Biological_Process
147	GO:0050819	negative regulation of coagulation	http://amigo.geneontology.org/amigo/term/GO:0050819	49	5	0.565106	8.8479	0.000238143	0.0111416	2191;5054;5270;5328;7057	THBS1;SERPINE1;FAP;PLAU;SERPINE2	geneontology_Biological_Process
148	GO:1900047	negative regulation of hemostasis	http://amigo.geneontology.org/amigo/term/GO:1900047	49	5	0.565106	8.8479	0.000238143	0.0111416	2191;5054;5270;5328;7057	THBS1;SERPINE1;FAP;PLAU;SERPINE2	geneontology_Biological_Process
149	GO:0006023	aminoglycan biosynthetic process	http://amigo.geneontology.org/amigo/term/GO:0006023	49	5	0.565106	8.8479	0.000238143	0.0111416	633;1462;1464;2239;6383	SDC2;VCAN;GPC4;BGN;CSPG4	geneontology_Biological_Process
150	GO:0042730	fibrinolysis	http://amigo.geneontology.org/amigo/term/GO:0042730	27	4	0.311385	12.8458	0.000240229	0.011147	2191;5054;5328;7057	THBS1;SERPINE1;FAP;PLAU	geneontology_Biological_Process
151	GO:0010812	negative regulation of cell-substrate adhesion	http://amigo.geneontology.org/amigo/term/GO:0010812	50	5	0.576639	8.67094	0.000262189	0.0120671	1277;5054;6695;7057;90102	SPOCK1;THBS1;SERPINE1;PHLDB2;COL1A1	geneontology_Biological_Process
152	GO:0001837	epithelial to mesenchymal transition	http://amigo.geneontology.org/amigo/term/GO:0001837	110	7	1.26861	5.51787	0.000270807	0.0123632	1277;4017;6423;8091;10630;26508;90102	LOXL2;HEYL;HMGA2;PHLDB2;PDPN;COL1A1;SFRP2	geneontology_Biological_Process
153	GO:1903053	regulation of extracellular matrix organization	http://amigo.geneontology.org/amigo/term/GO:1903053	28	4	0.322918	12.3871	0.000277786	0.0125804	165;2191;10630;90102	FAP;PHLDB2;PDPN;AEBP1	geneontology_Biological_Process
154	GO:0051271	negative regulation of cellular component movement	http://amigo.geneontology.org/amigo/term/GO:0051271	231	10	2.66407	3.75365	0.000327034	0.0145775	87;1281;1809;5054;5217;6423;7057;7168;10512;90102	ACTN1;THBS1;SERPINE1;PHLDB2;TPM1;SEMA3C;PFN2;COL3A1;DPYSL3;SFRP2	geneontology_Biological_Process
155	GO:0043588	skin development	http://amigo.geneontology.org/amigo/term/GO:0043588	231	10	2.66407	3.75365	0.000327034	0.0145775	1277;1278;1281;1289;1290;1829;1956;3624;10468;22943	DSG2;INHBA;COL5A1;DKK1;COL5A2;EGFR;COL1A1;COL3A1;COL1A2;FST	geneontology_Biological_Process
156	GO:0001707	mesoderm formation	http://amigo.geneontology.org/amigo/term/GO:0001707	54	5	0.62277	8.02865	0.000377265	0.0166349	3624;3688;6423;8091;22943	ITGB1;INHBA;HMGA2;DKK1;SFRP2	geneontology_Biological_Process
157	GO:0060349	bone morphogenesis	http://amigo.geneontology.org/amigo/term/GO:0060349	83	6	0.95722	6.26815	0.000379067	0.0166349	871;1277;1291;1293;4322;6423	SERPINH1;COL1A1;COL6A3;COL6A1;SFRP2;MMP13	geneontology_Biological_Process
158	GO:0048332	mesoderm morphogenesis	http://amigo.geneontology.org/amigo/term/GO:0048332	55	5	0.634303	7.88267	0.000411209	0.0179066	3624;3688;6423;8091;22943	ITGB1;INHBA;HMGA2;DKK1;SFRP2	geneontology_Biological_Process
159	GO:0052547	regulation of peptidase activity	http://amigo.geneontology.org/amigo/term/GO:0052547	332	12	3.82888	3.13407	0.000434275	0.0187667	857;871;1293;2152;2335;5054;5270;6423;6695;7057;7078;7980	SERPINH1;SPOCK1;THBS1;FN1;SERPINE1;CAV1;TIMP3;SERPINE2;COL6A3;SFRP2;TFPI2;F3	geneontology_Biological_Process
160	GO:0043687	post-translational protein modification	http://amigo.geneontology.org/amigo/term/GO:0043687	285	11	3.28684	3.34668	0.000438461	0.018804	1114;1462;2200;2335;3371;3915;6383;6696;8614;11098;11167	LAMC1;STC2;FN1;TNC;FSTL1;SDC2;PRSS23;VCAN;FBN1;SPP1;CHGB	geneontology_Biological_Process
161	GO:0030512	negative regulation of transforming growth factor beta receptor signaling pathway	http://amigo.geneontology.org/amigo/term/GO:0030512	56	5	0.645835	7.74191	0.000447408	0.0190434	857;2200;2201;23089;56937	PMEPA1;CAV1;FBN2;FBN1;PEG10	geneontology_Biological_Process
162	GO:0010927	cellular component assembly involved in morphogenesis	http://amigo.geneontology.org/amigo/term/GO:0010927	86	6	0.991819	6.04949	0.000459135	0.0193967	58;70;3688;4628;7168;90102	MYH10;ITGB1;PHLDB2;TPM1;ACTC1;ACTA1	geneontology_Biological_Process
163	GO:0060350	endochondral bone morphogenesis	http://amigo.geneontology.org/amigo/term/GO:0060350	57	5	0.657368	7.60609	0.000485959	0.0203779	871;1277;1291;1293;4322	SERPINH1;COL1A1;COL6A3;COL6A1;MMP13	geneontology_Biological_Process
164	GO:0035313	wound healing, spreading of epidermal cells	http://amigo.geneontology.org/amigo/term/GO:0035313	14	3	0.161459	18.5806	0.000495988	0.0204948	1289;3678;90102	ITGA5;PHLDB2;COL5A1	geneontology_Biological_Process
165	GO:0051917	regulation of fibrinolysis	http://amigo.geneontology.org/amigo/term/GO:0051917	14	3	0.161459	18.5806	0.000495988	0.0204948	2191;5054;7057	THBS1;SERPINE1;FAP	geneontology_Biological_Process
166	GO:0035051	cardiocyte differentiation	http://amigo.geneontology.org/amigo/term/GO:0035051	122	7	1.407	4.97513	0.000508903	0.0207259	70;1948;1956;3688;4628;10512;22943	MYH10;EFNB2;ITGB1;DKK1;SEMA3C;EGFR;ACTC1	geneontology_Biological_Process
167	GO:0001935	endothelial cell proliferation	http://amigo.geneontology.org/amigo/term/GO:0001935	122	7	1.407	4.97513	0.000508903	0.0207259	857;1012;2152;4017;6678;7057;7424	LOXL2;CDH13;THBS1;CAV1;SPARC;VEGFC;F3	geneontology_Biological_Process
168	GO:0030239	myofibril assembly	http://amigo.geneontology.org/amigo/term/GO:0030239	58	5	0.668901	7.47495	0.000526959	0.0211569	58;70;3688;4628;7168	MYH10;ITGB1;TPM1;ACTC1;ACTA1	geneontology_Biological_Process
169	GO:1903845	negative regulation of cellular response to transforming growth factor beta stimulus	http://amigo.geneontology.org/amigo/term/GO:1903845	58	5	0.668901	7.47495	0.000526959	0.0211569	857;2200;2201;23089;56937	PMEPA1;CAV1;FBN2;FBN1;PEG10	geneontology_Biological_Process
170	GO:0048545	response to steroid hormone	http://amigo.geneontology.org/amigo/term/GO:0048545	341	12	3.93268	3.05136	0.000551713	0.0219947	58;374;595;857;1277;1829;1956;6678;6696;7057;26508;56937	THBS1;DSG2;HEYL;PMEPA1;CAV1;EGFR;COL1A1;SPARC;CCND1;SPP1;AREG;ACTA1	geneontology_Biological_Process
171	GO:0006029	proteoglycan metabolic process	http://amigo.geneontology.org/amigo/term/GO:0006029	34	4	0.392114	10.2011	0.000596535	0.0236153	633;1301;1462;1464	VCAN;COL11A1;BGN;CSPG4	geneontology_Biological_Process
172	GO:2000811	negative regulation of anoikis	http://amigo.geneontology.org/amigo/term/GO:2000811	15	3	0.172992	17.3419	0.000614787	0.0241688	857;3678;3688	ITGA5;ITGB1;CAV1	geneontology_Biological_Process
173	GO:0032102	negative regulation of response to external stimulus	http://amigo.geneontology.org/amigo/term/GO:0032102	254	10	2.92932	3.41376	0.000689508	0.0269193	2191;4907;5054;5270;5328;6696;7057;7130;10512;90102	THBS1;SERPINE1;FAP;NT5E;PHLDB2;TNFAIP6;PLAU;SEMA3C;SERPINE2;SPP1	geneontology_Biological_Process
174	GO:0030204	chondroitin sulfate metabolic process	http://amigo.geneontology.org/amigo/term/GO:0030204	16	3	0.184524	16.258	0.000750319	0.0286997	633;1462;1464	VCAN;BGN;CSPG4	geneontology_Biological_Process
175	GO:0050654	chondroitin sulfate proteoglycan metabolic process	http://amigo.geneontology.org/amigo/term/GO:0050654	16	3	0.184524	16.258	0.000750319	0.0286997	633;1462;1464	VCAN;BGN;CSPG4	geneontology_Biological_Process
176	GO:0003433	chondrocyte development involved in endochondral bone morphogenesis	http://amigo.geneontology.org/amigo/term/GO:0003433	16	3	0.184524	16.258	0.000750319	0.0286997	871;1291;1293	SERPINH1;COL6A3;COL6A1	geneontology_Biological_Process
177	GO:0050920	regulation of chemotaxis	http://amigo.geneontology.org/amigo/term/GO:0050920	170	8	1.96057	4.08044	0.000763286	0.0289997	1012;1948;2150;2152;5054;7057;7424;10512	CDH13;THBS1;EFNB2;SERPINE1;F2RL1;SEMA3C;VEGFC;F3	geneontology_Biological_Process
178	GO:0045861	negative regulation of proteolysis	http://amigo.geneontology.org/amigo/term/GO:0045861	259	10	2.98699	3.34785	0.000801369	0.030184	871;1293;5054;5270;6423;6695;7057;7078;7980;55450	SERPINH1;SPOCK1;THBS1;SERPINE1;CAMK2N1;TIMP3;SERPINE2;COL6A3;SFRP2;TFPI2	geneontology_Biological_Process
179	GO:0007162	negative regulation of cell adhesion	http://amigo.geneontology.org/amigo/term/GO:0007162	214	9	2.46801	3.64666	0.00080512	0.030184	1012;1277;3371;5054;5270;6695;7045;7057;90102	SPOCK1;CDH13;THBS1;SERPINE1;TNC;PHLDB2;TGFBI;SERPINE2;COL1A1	geneontology_Biological_Process
180	GO:0043542	endothelial cell migration	http://amigo.geneontology.org/amigo/term/GO:0043542	172	8	1.98364	4.033	0.000823968	0.0305117	1012;1948;2191;3688;4017;6678;7057;7424	LOXL2;CDH13;THBS1;EFNB2;FAP;ITGB1;SPARC;VEGFC	geneontology_Biological_Process
181	GO:0050680	negative regulation of epithelial cell proliferation	http://amigo.geneontology.org/amigo/term/GO:0050680	96	6	1.10715	5.41934	0.000824721	0.0305117	857;1021;1948;6423;6678;7057	CDK6;THBS1;EFNB2;CAV1;SPARC;SFRP2	geneontology_Biological_Process
182	GO:0003208	cardiac ventricle morphogenesis	http://amigo.geneontology.org/amigo/term/GO:0003208	64	5	0.738098	6.77417	0.000830029	0.0305117	1301;6423;7168;10512;26508	HEYL;TPM1;SEMA3C;COL11A1;SFRP2	geneontology_Biological_Process
183	GO:0001952	regulation of cell-matrix adhesion	http://amigo.geneontology.org/amigo/term/GO:0001952	97	6	1.11868	5.36347	0.000870946	0.0318092	1012;1021;5054;5328;7057;90102	CDK6;CDH13;THBS1;SERPINE1;PHLDB2;PLAU	geneontology_Biological_Process
184	GO:0048738	cardiac muscle tissue development	http://amigo.geneontology.org/amigo/term/GO:0048738	174	8	2.0067	3.98664	0.000888474	0.0321047	70;1301;1829;1948;3688;4628;7168;22943	MYH10;DSG2;EFNB2;ITGB1;TPM1;DKK1;COL11A1;ACTC1	geneontology_Biological_Process
185	GO:0048771	tissue remodeling	http://amigo.geneontology.org/amigo/term/GO:0048771	134	7	1.54539	4.5296	0.00089038	0.0321047	633;857;1464;1956;6696;7052;10512	CAV1;SEMA3C;EGFR;TGM2;BGN;SPP1;CSPG4	geneontology_Biological_Process
186	GO:0030728	ovulation	http://amigo.geneontology.org/amigo/term/GO:0030728	17	3	0.196057	15.3017	0.000903471	0.0323706	3624;3625;7130	INHBA;TNFAIP6;INHBB	geneontology_Biological_Process
187	GO:0001654	eye development	http://amigo.geneontology.org/amigo/term/GO:0001654	265	10	3.05619	3.27205	0.00095495	0.0339998	1282;1289;1290;1295;1956;2200;2201;3624;4237;4628	MYH10;COL4A1;INHBA;COL5A1;MFAP2;COL5A2;EGFR;FBN2;COL8A1;FBN1	geneontology_Biological_Process
188	GO:0045995	regulation of embryonic development	http://amigo.geneontology.org/amigo/term/GO:0045995	99	6	1.14174	5.25512	0.000969375	0.0341602	1289;1290;3909;6423;22943;90102	PHLDB2;COL5A1;DKK1;LAMA3;COL5A2;SFRP2	geneontology_Biological_Process
189	GO:2001236	regulation of extrinsic apoptotic signaling pathway	http://amigo.geneontology.org/amigo/term/GO:2001236	136	7	1.56846	4.46298	0.000971524	0.0341602	857;3624;5054;6423;7057;7078;8406	SRPX;THBS1;SERPINE1;INHBA;CAV1;TIMP3;SFRP2	geneontology_Biological_Process
190	GO:0150063	visual system development	http://amigo.geneontology.org/amigo/term/GO:0150063	266	10	3.06772	3.25975	0.000982755	0.0343418	1282;1289;1290;1295;1956;2200;2201;3624;4237;4628	MYH10;COL4A1;INHBA;COL5A1;MFAP2;COL5A2;EGFR;FBN2;COL8A1;FBN1	geneontology_Biological_Process
191	GO:0030049	muscle filament sliding	http://amigo.geneontology.org/amigo/term/GO:0030049	39	4	0.449778	8.89327	0.00101212	0.0347249	58;70;1674;7168	TPM1;ACTC1;DES;ACTA1	geneontology_Biological_Process
192	GO:0033275	actin-myosin filament sliding	http://amigo.geneontology.org/amigo/term/GO:0033275	39	4	0.449778	8.89327	0.00101212	0.0347249	58;70;1674;7168	TPM1;ACTC1;DES;ACTA1	geneontology_Biological_Process
193	GO:0010171	body morphogenesis	http://amigo.geneontology.org/amigo/term/GO:0010171	39	4	0.449778	8.89327	0.00101212	0.0347249	1277;4313;22943;90102	PHLDB2;DKK1;COL1A1;MMP2	geneontology_Biological_Process
194	GO:0048880	sensory system development	http://amigo.geneontology.org/amigo/term/GO:0048880	269	10	3.10232	3.2234	0.00107019	0.0364436	1282;1289;1290;1295;1956;2200;2201;3624;4237;4628	MYH10;COL4A1;INHBA;COL5A1;MFAP2;COL5A2;EGFR;FBN2;COL8A1;FBN1	geneontology_Biological_Process
195	GO:0001945	lymph vessel development	http://amigo.geneontology.org/amigo/term/GO:0001945	18	3	0.20759	14.4516	0.00107509	0.0364436	1948;7424;10630	EFNB2;PDPN;VEGFC	geneontology_Biological_Process
196	GO:0044706	multi-multicellular organism process	http://amigo.geneontology.org/amigo/term/GO:0044706	180	8	2.0759	3.85375	0.0011067	0.0372918	1829;3678;4313;4316;5270;5744;6696;8614	ITGA5;STC2;DSG2;PTHLH;SERPINE2;MMP2;MMP7;SPP1	geneontology_Biological_Process
197	GO:0007584	response to nutrient	http://amigo.geneontology.org/amigo/term/GO:0007584	183	8	2.1105	3.79057	0.00123084	0.0412296	595;1277;1956;3371;6423;6678;6696;8614	STC2;TNC;EGFR;COL1A1;SPARC;CCND1;SFRP2;SPP1	geneontology_Biological_Process
198	GO:0060560	developmental growth involved in morphogenesis	http://amigo.geneontology.org/amigo/term/GO:0060560	184	8	2.12203	3.76997	0.00127461	0.0424445	374;2335;3371;3688;4131;6423;6696;10512	FN1;ITGB1;TNC;SEMA3C;MAP1B;SFRP2;SPP1;AREG	geneontology_Biological_Process
199	GO:0001667	ameboidal-type cell migration	http://amigo.geneontology.org/amigo/term/GO:0001667	326	11	3.75968	2.92578	0.00132753	0.0437615	1012;1948;2191;2335;3688;4017;5217;6678;7057;7424;10512	LOXL2;CDH13;THBS1;FN1;EFNB2;FAP;ITGB1;SEMA3C;PFN2;SPARC;VEGFC	geneontology_Biological_Process
200	GO:0010717	regulation of epithelial to mesenchymal transition	http://amigo.geneontology.org/amigo/term/GO:0010717	71	5	0.818827	6.1063	0.00132962	0.0437615	1277;4017;6423;10630;90102	LOXL2;PHLDB2;PDPN;COL1A1;SFRP2	geneontology_Biological_Process
201	GO:0090303	positive regulation of wound healing	http://amigo.geneontology.org/amigo/term/GO:0090303	42	4	0.484377	8.25804	0.00134122	0.0438882	2152;5054;7057;10630	THBS1;SERPINE1;PDPN;F3	geneontology_Biological_Process
202	GO:0001936	regulation of endothelial cell proliferation	http://amigo.geneontology.org/amigo/term/GO:0001936	107	6	1.23401	4.86221	0.00145128	0.0472165	857;1012;2152;6678;7057;7424	CDH13;THBS1;CAV1;SPARC;VEGFC;F3	geneontology_Biological_Process
203	GO:2000209	regulation of anoikis	http://amigo.geneontology.org/amigo/term/GO:2000209	20	3	0.230655	13.0064	0.00147694	0.0477769	857;3678;3688	ITGA5;ITGB1;CAV1	geneontology_Biological_Process
204	GO:0030203	glycosaminoglycan metabolic process	http://amigo.geneontology.org/amigo/term/GO:0030203	73	5	0.841893	5.939	0.00150617	0.0484458	633;1462;1464;2239;6383	SDC2;VCAN;GPC4;BGN;CSPG4	geneontology_Biological_Process
548	GO:0031012	extracellular matrix	http://amigo.geneontology.org/amigo/term/GO:0031012	344	53	3.4734	15.2588	0	0	165;633;871;1012;1277;1278;1281;1282;1284;1288;1289;1290;1291;1293;1295;1300;1301;1462;1464;2152;2200;2201;2239;2335;3371;3909;3914;3915;3918;4017;4237;4312;4313;4316;4319;4320;4322;4811;5054;5270;6383;6423;6678;7045;7052;7057;7058;7078;7980;8076;10085;22795;25878	SERPINH1;LAMC1;LOXL2;CDH13;THBS1;FN1;SERPINE1;COL4A1;TNC;COL4A2;NID1;LAMC2;COL5A1;COL4A6;SDC2;LAMA3;MFAP2;COL5A2;TGFBI;NID2;LAMB3;TIMP3;VCAN;SERPINE2;MXRA5;COL10A1;FBN2;COL11A1;COL1A1;GPC4;SPARC;COL6A3;COL3A1;MMP2;COL6A1;COL1A2;EDIL3;TGM2;BGN;AEBP1;MFAP5;MMP7;COL8A1;SFRP2;THBS2;FBN1;MMP13;MMP10;CSPG4;TFPI2;F3;MMP11;MMP1	geneontology_Cellular_Component
549	GO:0062023	collagen-containing extracellular matrix	http://amigo.geneontology.org/amigo/term/GO:0062023	278	47	2.80699	16.7439	0	0	165;633;871;1012;1277;1278;1281;1282;1284;1288;1289;1290;1291;1293;1295;1300;1301;1462;1464;2152;2200;2201;2239;2335;3371;3909;3914;3915;3918;4017;4237;4313;4811;5054;5270;6383;6423;6678;7045;7052;7057;7058;7078;8076;10085;22795;25878	SERPINH1;LAMC1;LOXL2;CDH13;THBS1;FN1;SERPINE1;COL4A1;TNC;COL4A2;NID1;LAMC2;COL5A1;COL4A6;SDC2;LAMA3;MFAP2;COL5A2;TGFBI;NID2;LAMB3;TIMP3;VCAN;SERPINE2;MXRA5;COL10A1;FBN2;COL11A1;COL1A1;GPC4;SPARC;COL6A3;COL3A1;MMP2;COL6A1;COL1A2;EDIL3;TGM2;BGN;AEBP1;MFAP5;COL8A1;SFRP2;THBS2;FBN1;CSPG4;F3	geneontology_Cellular_Component
550	GO:0005788	endoplasmic reticulum lumen	http://amigo.geneontology.org/amigo/term/GO:0005788	234	29	2.36272	12.274	0	0	871;1114;1277;1278;1281;1282;1284;1288;1289;1290;1291;1293;1295;1300;1301;1462;2200;2335;3371;3915;5033;6383;6696;7057;8614;11098;11167;56034;60681	P4HA1;SERPINH1;LAMC1;STC2;THBS1;FN1;COL4A1;TNC;COL4A2;PDGFC;FSTL1;COL5A1;COL4A6;SDC2;COL5A2;PRSS23;VCAN;COL10A1;COL11A1;COL1A1;FKBP10;COL6A3;COL3A1;COL6A1;COL1A2;COL8A1;FBN1;SPP1;CHGB	geneontology_Cellular_Component
551	GO:0005604	basement membrane	http://amigo.geneontology.org/amigo/term/GO:0005604	73	19	0.737087	25.7771	0	0	1282;1284;1288;1289;1295;2200;2335;3371;3909;3914;3915;3918;4017;4811;6678;7045;7058;7078;22795	LAMC1;LOXL2;FN1;COL4A1;TNC;COL4A2;NID1;LAMC2;COL5A1;COL4A6;LAMA3;TGFBI;NID2;LAMB3;TIMP3;SPARC;COL8A1;THBS2;FBN1	geneontology_Cellular_Component
552	GO:0044420	extracellular matrix component	http://amigo.geneontology.org/amigo/term/GO:0044420	43	19	0.434175	43.7612	0	0	1277;1278;1281;1282;1284;1288;1289;1290;1295;1301;2200;2201;3371;3909;3914;3915;3918;4237;8076	LAMC1;COL4A1;TNC;COL4A2;LAMC2;COL5A1;COL4A6;LAMA3;MFAP2;COL5A2;LAMB3;FBN2;COL11A1;COL1A1;COL3A1;COL1A2;MFAP5;COL8A1;FBN1	geneontology_Cellular_Component
553	GO:0098644	complex of collagen trimers	http://amigo.geneontology.org/amigo/term/GO:0098644	18	10	0.181748	55.0214	2.22045e-16	2.61643e-14	1277;1278;1281;1282;1284;1288;1289;1290;1295;1301	COL4A1;COL4A2;COL5A1;COL4A6;COL5A2;COL11A1;COL1A1;COL3A1;COL1A2;COL8A1	geneontology_Cellular_Component
554	GO:0005581	collagen trimer	http://amigo.geneontology.org/amigo/term/GO:0005581	58	13	0.585631	22.1983	1.13243e-14	1.14375e-12	1277;1278;1281;1282;1284;1288;1289;1290;1291;1293;1295;1300;1301	COL4A1;COL4A2;COL5A1;COL4A6;COL5A2;COL10A1;COL11A1;COL1A1;COL6A3;COL3A1;COL6A1;COL1A2;COL8A1	geneontology_Cellular_Component
555	GO:0005583	fibrillar collagen trimer	http://amigo.geneontology.org/amigo/term/GO:0005583	10	6	0.100971	59.4231	1.86219e-10	1.46285e-08	1277;1278;1281;1289;1290;1301	COL5A1;COL5A2;COL11A1;COL1A1;COL3A1;COL1A2	geneontology_Cellular_Component
556	GO:0098643	banded collagen fibril	http://amigo.geneontology.org/amigo/term/GO:0098643	10	6	0.100971	59.4231	1.86219e-10	1.46285e-08	1277;1278;1281;1289;1290;1301	COL5A1;COL5A2;COL11A1;COL1A1;COL3A1;COL1A2	geneontology_Cellular_Component
557	GO:0031091	platelet alpha granule	http://amigo.geneontology.org/amigo/term/GO:0031091	78	8	0.787573	10.1578	1.07664e-06	7.61184e-05	87;2335;5054;5270;6678;7057;7058;7424	ACTN1;THBS1;FN1;SERPINE1;SERPINE2;SPARC;VEGFC;THBS2	geneontology_Cellular_Component
558	GO:0031252	cell leading edge	http://amigo.geneontology.org/amigo/term/GO:0031252	336	15	3.39262	4.42136	1.26496e-06	8.13024e-05	58;70;87;1021;1464;1809;2191;3678;3688;4628;7168;8910;10630;10979;90102	ITGA5;ACTN1;CDK6;MYH10;FERMT2;FAP;ITGB1;PHLDB2;TPM1;SGCE;PDPN;DPYSL3;CSPG4;ACTC1;ACTA1	geneontology_Cellular_Component
559	GO:0070161	anchoring junction	http://amigo.geneontology.org/amigo/term/GO:0070161	497	18	5.01825	3.58691	2.06443e-06	0.000121629	70;87;857;1009;1012;1464;1674;1829;1948;1956;2191;3371;3678;3688;5328;7052;10979;90102	ITGA5;ACTN1;CDH13;DSG2;EFNB2;FERMT2;FAP;ITGB1;TNC;PHLDB2;CDH11;PLAU;CAV1;EGFR;TGM2;CSPG4;ACTC1;DES	geneontology_Cellular_Component
560	GO:0005925	focal adhesion	http://amigo.geneontology.org/amigo/term/GO:0005925	371	15	3.74602	4.00425	4.3122e-06	0.000232531	70;87;857;1012;1464;1948;1956;2191;3371;3678;3688;5328;7052;10979;90102	ITGA5;ACTN1;CDH13;EFNB2;FERMT2;FAP;ITGB1;TNC;PHLDB2;PLAU;CAV1;EGFR;TGM2;CSPG4;ACTC1	geneontology_Cellular_Component
561	GO:0005924	cell-substrate adherens junction	http://amigo.geneontology.org/amigo/term/GO:0005924	373	15	3.76621	3.98278	4.60457e-06	0.000232531	70;87;857;1012;1464;1948;1956;2191;3371;3678;3688;5328;7052;10979;90102	ITGA5;ACTN1;CDH13;EFNB2;FERMT2;FAP;ITGB1;TNC;PHLDB2;PLAU;CAV1;EGFR;TGM2;CSPG4;ACTC1	geneontology_Cellular_Component
562	GO:0030055	cell-substrate junction	http://amigo.geneontology.org/amigo/term/GO:0030055	376	15	3.7965	3.951	5.07645e-06	0.00023927	70;87;857;1012;1464;1948;1956;2191;3371;3678;3688;5328;7052;10979;90102	ITGA5;ACTN1;CDH13;EFNB2;FERMT2;FAP;ITGB1;TNC;PHLDB2;PLAU;CAV1;EGFR;TGM2;CSPG4;ACTC1	geneontology_Cellular_Component
563	GO:0005912	adherens junction	http://amigo.geneontology.org/amigo/term/GO:0005912	484	17	4.88699	3.47862	6.2069e-06	0.000274267	70;87;857;1009;1012;1464;1674;1948;1956;2191;3371;3678;3688;5328;7052;10979;90102	ITGA5;ACTN1;CDH13;EFNB2;FERMT2;FAP;ITGB1;TNC;PHLDB2;CDH11;PLAU;CAV1;EGFR;TGM2;CSPG4;ACTC1;DES	geneontology_Cellular_Component
564	GO:0031093	platelet alpha granule lumen	http://amigo.geneontology.org/amigo/term/GO:0031093	56	6	0.565437	10.6113	1.97687e-05	0.000822146	87;2335;5054;6678;7057;7424	ACTN1;THBS1;FN1;SERPINE1;SPARC;VEGFC	geneontology_Cellular_Component
565	GO:0031258	lamellipodium membrane	http://amigo.geneontology.org/amigo/term/GO:0031258	18	4	0.181748	22.0085	2.69195e-05	0.00105734	1464;2191;10630;10979	FERMT2;FAP;PDPN;CSPG4	geneontology_Cellular_Component
566	GO:0030027	lamellipodium	http://amigo.geneontology.org/amigo/term/GO:0030027	167	9	1.68621	5.3374	4.58989e-05	0.00165204	58;70;1464;1809;2191;3688;4628;10630;10979	MYH10;FERMT2;FAP;ITGB1;PDPN;DPYSL3;CSPG4;ACTC1;ACTA1	geneontology_Cellular_Component
567	GO:0042641	actomyosin	http://amigo.geneontology.org/amigo/term/GO:0042641	65	6	0.656311	9.14201	4.67338e-05	0.00165204	58;70;87;4628;7168;10979	ACTN1;MYH10;FERMT2;TPM1;ACTC1;ACTA1	geneontology_Cellular_Component
568	GO:0031256	leading edge membrane	http://amigo.geneontology.org/amigo/term/GO:0031256	138	8	1.3934	5.74136	7.40225e-05	0.00249209	1464;2191;3678;3688;7168;8910;10630;10979	ITGA5;FERMT2;FAP;ITGB1;TPM1;SGCE;PDPN;CSPG4	geneontology_Cellular_Component
569	GO:0005796	Golgi lumen	http://amigo.geneontology.org/amigo/term/GO:0005796	80	6	0.807767	7.42788	0.000150477	0.00483579	633;1462;1464;2239;4320;6383	SDC2;VCAN;GPC4;BGN;CSPG4;MMP11	geneontology_Cellular_Component
570	GO:0042383	sarcolemma	http://amigo.geneontology.org/amigo/term/GO:0042383	117	7	1.18136	5.92538	0.000174477	0.00536326	633;857;1291;1293;1674;3688;8910	ITGB1;SGCE;CAV1;COL6A3;COL6A1;BGN;DES	geneontology_Cellular_Component
571	GO:0001725	stress fiber	http://amigo.geneontology.org/amigo/term/GO:0001725	54	5	0.545243	9.17023	0.00020346	0.00575385	58;87;4628;7168;10979	ACTN1;MYH10;FERMT2;TPM1;ACTA1	geneontology_Cellular_Component
572	GO:0097517	contractile actin filament bundle	http://amigo.geneontology.org/amigo/term/GO:0097517	54	5	0.545243	9.17023	0.00020346	0.00575385	58;87;4628;7168;10979	ACTN1;MYH10;FERMT2;TPM1;ACTA1	geneontology_Cellular_Component
573	GO:0032432	actin filament bundle	http://amigo.geneontology.org/amigo/term/GO:0032432	59	5	0.595728	8.39309	0.000309488	0.00841568	58;87;4628;7168;10979	ACTN1;MYH10;FERMT2;TPM1;ACTA1	geneontology_Cellular_Component
574	GO:0071437	invadopodium	http://amigo.geneontology.org/amigo/term/GO:0071437	15	3	0.151456	19.8077	0.000416587	0.0109084	2191;3688;10630	FAP;ITGB1;PDPN	geneontology_Cellular_Component
575	GO:0043202	lysosomal lumen	http://amigo.geneontology.org/amigo/term/GO:0043202	64	5	0.646214	7.73738	0.000452916	0.0114361	633;1462;1464;2239;6383	SDC2;VCAN;GPC4;BGN;CSPG4	geneontology_Cellular_Component
576	GO:0031594	neuromuscular junction	http://amigo.geneontology.org/amigo/term/GO:0031594	66	5	0.666408	7.50291	0.000522483	0.0127378	1674;3688;4628;5270;6695	SPOCK1;MYH10;ITGB1;SERPINE2;DES	geneontology_Cellular_Component
577	GO:0030016	myofibril	http://amigo.geneontology.org/amigo/term/GO:0030016	185	8	1.86796	4.28274	0.000551714	0.0130021	58;70;87;800;1674;4313;7168;10979	ACTN1;FERMT2;CALD1;TPM1;MMP2;ACTC1;DES;ACTA1	geneontology_Cellular_Component
578	GO:0001726	ruffle	http://amigo.geneontology.org/amigo/term/GO:0001726	146	7	1.47417	4.74842	0.000672109	0.0153284	87;1021;2191;3678;3688;7168;10630	ITGA5;ACTN1;CDK6;FAP;ITGB1;TPM1;PDPN	geneontology_Cellular_Component
579	GO:0043292	contractile fiber	http://amigo.geneontology.org/amigo/term/GO:0043292	194	8	1.95883	4.08406	0.000754309	0.0166655	58;70;87;800;1674;4313;7168;10979	ACTN1;FERMT2;CALD1;TPM1;MMP2;ACTC1;DES;ACTA1	geneontology_Cellular_Component
580	GO:0032587	ruffle membrane	http://amigo.geneontology.org/amigo/term/GO:0032587	81	5	0.817864	6.11349	0.00132942	0.0284818	2191;3678;3688;7168;10630	ITGA5;FAP;ITGB1;TPM1;PDPN	geneontology_Cellular_Component
581	GO:0014704	intercalated disc	http://amigo.geneontology.org/amigo/term/GO:0014704	49	4	0.494757	8.08477	0.0014662	0.0291196	87;1674;1829;3688	ACTN1;DSG2;ITGB1;DES	geneontology_Cellular_Component
582	GO:0030017	sarcomere	http://amigo.geneontology.org/amigo/term/GO:0030017	167	7	1.68621	4.15131	0.00147667	0.0291196	58;70;87;1674;4313;7168;10979	ACTN1;FERMT2;TPM1;MMP2;ACTC1;DES;ACTA1	geneontology_Cellular_Component
583	GO:0005884	actin filament	http://amigo.geneontology.org/amigo/term/GO:0005884	83	5	0.838058	5.96617	0.00148275	0.0291196	58;70;87;1809;7168	ACTN1;TPM1;DPYSL3;ACTC1;ACTA1	geneontology_Cellular_Component
584	GO:0044449	contractile fiber part	http://amigo.geneontology.org/amigo/term/GO:0044449	183	7	1.84777	3.78836	0.00248565	0.0474961	58;70;87;1674;4313;7168;10979	ACTN1;FERMT2;TPM1;MMP2;ACTC1;DES;ACTA1	geneontology_Cellular_Component
615	GO:0005201	extracellular matrix structural constituent	http://amigo.geneontology.org/amigo/term/GO:0005201	116	34	1.25012	27.1973	0	0	165;633;1277;1278;1281;1282;1284;1288;1289;1290;1291;1293;1295;1300;1301;1462;2200;2201;2335;3371;3909;3915;3918;4237;4811;6678;7045;7057;7058;7980;8076;10085;22795;25878	LAMC1;THBS1;FN1;COL4A1;TNC;COL4A2;NID1;LAMC2;COL5A1;COL4A6;LAMA3;MFAP2;COL5A2;TGFBI;NID2;VCAN;MXRA5;COL10A1;FBN2;COL11A1;COL1A1;SPARC;COL6A3;COL3A1;COL6A1;COL1A2;EDIL3;BGN;AEBP1;MFAP5;COL8A1;THBS2;FBN1;TFPI2	geneontology_Molecular_Function
616	GO:0030020	extracellular matrix structural constituent conferring tensile strength	http://amigo.geneontology.org/amigo/term/GO:0030020	29	13	0.312531	41.5959	0	0	1277;1278;1281;1282;1284;1288;1289;1290;1291;1293;1295;1300;1301	COL4A1;COL4A2;COL5A1;COL4A6;COL5A2;COL10A1;COL11A1;COL1A1;COL6A3;COL3A1;COL6A1;COL1A2;COL8A1	geneontology_Molecular_Function
617	GO:0005518	collagen binding	http://amigo.geneontology.org/amigo/term/GO:0005518	55	11	0.59273	18.5582	1.10245e-11	3.4911e-09	165;871;2335;3688;4322;4811;6678;6695;7045;7057;22795	SERPINH1;SPOCK1;THBS1;FN1;ITGB1;NID1;TGFBI;NID2;SPARC;AEBP1;MMP13	geneontology_Molecular_Function
618	GO:0005178	integrin binding	http://amigo.geneontology.org/amigo/term/GO:0005178	112	13	1.20701	10.7704	1.79551e-10	4.26433e-08	87;1281;1289;1956;2191;2200;2335;3678;3688;6423;7045;7057;10085	ITGA5;ACTN1;THBS1;FN1;FAP;ITGB1;COL5A1;TGFBI;EGFR;COL3A1;EDIL3;SFRP2;FBN1	geneontology_Molecular_Function
619	GO:0048407	platelet-derived growth factor binding	http://amigo.geneontology.org/amigo/term/GO:0048407	11	6	0.118546	50.6132	6.0389e-10	1.14739e-07	1277;1278;1281;1282;1289;1291	COL4A1;COL5A1;COL1A1;COL3A1;COL6A1;COL1A2	geneontology_Molecular_Function
620	GO:0050840	extracellular matrix binding	http://amigo.geneontology.org/amigo/term/GO:0050840	45	9	0.484961	18.5582	9.02776e-10	1.25363e-07	633;1301;3688;4811;6678;6695;6696;7045;7057	SPOCK1;THBS1;ITGB1;NID1;TGFBI;COL11A1;SPARC;BGN;SPP1	geneontology_Molecular_Function
621	GO:0005539	glycosaminoglycan binding	http://amigo.geneontology.org/amigo/term/GO:0005539	154	14	1.65965	8.43554	9.2373e-10	1.25363e-07	633;1289;1301;1462;1809;2200;2335;3918;4316;5270;7057;7058;7130;11167	THBS1;FN1;FSTL1;LAMC2;COL5A1;TNFAIP6;VCAN;SERPINE2;COL11A1;DPYSL3;BGN;MMP7;THBS2;FBN1	geneontology_Molecular_Function
622	GO:1901681	sulfur compound binding	http://amigo.geneontology.org/amigo/term/GO:1901681	168	12	1.81052	6.62792	2.32209e-07	2.75748e-05	1289;1301;1809;2200;2335;3918;4316;5270;7057;7058;10468;11167	THBS1;FN1;FSTL1;LAMC2;COL5A1;SERPINE2;COL11A1;DPYSL3;FST;MMP7;THBS2;FBN1	geneontology_Molecular_Function
623	GO:0004252	serine-type endopeptidase activity	http://amigo.geneontology.org/amigo/term/GO:0004252	117	10	1.2609	7.93085	4.76225e-07	4.79541e-05	2152;2191;4312;4313;4316;4319;4320;4322;5328;11098	FAP;PLAU;PRSS23;MMP2;MMP7;MMP13;MMP10;F3;MMP11;MMP1	geneontology_Molecular_Function
624	GO:0008201	heparin binding	http://amigo.geneontology.org/amigo/term/GO:0008201	118	10	1.27168	7.86364	5.15677e-07	4.79541e-05	1289;1301;2200;2335;3918;4316;5270;7057;7058;11167	THBS1;FN1;FSTL1;LAMC2;COL5A1;SERPINE2;COL11A1;MMP7;THBS2;FBN1	geneontology_Molecular_Function
625	GO:0050839	cell adhesion molecule binding	http://amigo.geneontology.org/amigo/term/GO:0050839	424	18	4.56941	3.93924	5.55258e-07	4.79541e-05	87;800;1009;1012;1281;1289;1829;1956;2191;2200;2335;3678;3688;6423;7045;7057;10085;90102	ITGA5;ACTN1;CDH13;THBS1;DSG2;FN1;FAP;ITGB1;CALD1;PHLDB2;CDH11;COL5A1;TGFBI;EGFR;COL3A1;EDIL3;SFRP2;FBN1	geneontology_Molecular_Function
626	GO:0004222	metalloendopeptidase activity	http://amigo.geneontology.org/amigo/term/GO:0004222	68	8	0.73283	10.9166	6.08516e-07	4.80172e-05	2191;4312;4313;4316;4319;4320;4322;8038	FAP;ADAM12;MMP2;MMP7;MMP13;MMP10;MMP11;MMP1	geneontology_Molecular_Function
627	GO:0043394	proteoglycan binding	http://amigo.geneontology.org/amigo/term/GO:0043394	30	6	0.323308	18.5582	6.57077e-07	4.80172e-05	1289;2335;3371;4811;7057;10468	THBS1;FN1;TNC;NID1;COL5A1;FST	geneontology_Molecular_Function
628	GO:0008236	serine-type peptidase activity	http://amigo.geneontology.org/amigo/term/GO:0008236	130	10	1.401	7.13776	1.26589e-06	8.59e-05	2152;2191;4312;4313;4316;4319;4320;4322;5328;11098	FAP;PLAU;PRSS23;MMP2;MMP7;MMP13;MMP10;F3;MMP11;MMP1	geneontology_Molecular_Function
629	GO:0017171	serine hydrolase activity	http://amigo.geneontology.org/amigo/term/GO:0017171	132	10	1.42255	7.02961	1.45651e-06	9.22453e-05	2152;2191;4312;4313;4316;4319;4320;4322;5328;11098	FAP;PLAU;PRSS23;MMP2;MMP7;MMP13;MMP10;F3;MMP11;MMP1	geneontology_Molecular_Function
630	GO:0005509	calcium ion binding	http://amigo.geneontology.org/amigo/term/GO:0005509	458	18	4.93583	3.6468	1.69472e-06	0.000100624	87;1009;1012;1462;1829;2200;2201;4017;4322;4811;6678;6695;7057;7058;10085;11167;22795;60681	ACTN1;SPOCK1;LOXL2;CDH13;THBS1;DSG2;NID1;CDH11;FSTL1;NID2;VCAN;FBN2;FKBP10;SPARC;EDIL3;THBS2;FBN1;MMP13	geneontology_Molecular_Function
631	GO:0008237	metallopeptidase activity	http://amigo.geneontology.org/amigo/term/GO:0008237	109	9	1.17468	7.66163	2.44957e-06	0.000136888	165;2191;4312;4313;4316;4319;4320;4322;8038	FAP;ADAM12;MMP2;AEBP1;MMP7;MMP13;MMP10;MMP11;MMP1	geneontology_Molecular_Function
632	GO:0002020	protease binding	http://amigo.geneontology.org/amigo/term/GO:0002020	115	9	1.23935	7.2619	3.82922e-06	0.000202098	1277;1278;1281;2152;2191;2335;3688;5054;7078	FN1;SERPINE1;FAP;ITGB1;TIMP3;COL1A1;COL3A1;COL1A2;F3	geneontology_Molecular_Function
633	GO:0061134	peptidase regulator activity	http://amigo.geneontology.org/amigo/term/GO:0061134	151	10	1.62731	6.14509	4.93053e-06	0.000246527	857;871;1293;2335;5054;5270;6423;6695;7078;7980	SERPINH1;SPOCK1;FN1;SERPINE1;CAV1;TIMP3;SERPINE2;COL6A3;SFRP2;TFPI2	geneontology_Molecular_Function
634	GO:0030545	receptor regulator activity	http://amigo.geneontology.org/amigo/term/GO:0030545	371	15	3.99824	3.75165	9.71798e-06	0.000461604	374;1114;2200;3624;3625;5744;6423;6696;7424;8614;10468;10512;22943;27122;56034	STC2;DKK3;INHBA;PDGFC;DKK1;PTHLH;SEMA3C;INHBB;FST;VEGFC;SFRP2;FBN1;SPP1;CHGB;AREG	geneontology_Molecular_Function
635	GO:0004867	serine-type endopeptidase inhibitor activity	http://amigo.geneontology.org/amigo/term/GO:0004867	55	6	0.59273	10.1226	2.57812e-05	0.00116629	871;1293;5054;5270;6695;7980	SERPINH1;SPOCK1;SERPINE1;SERPINE2;COL6A3;TFPI2	geneontology_Molecular_Function
636	GO:0019838	growth factor binding	http://amigo.geneontology.org/amigo/term/GO:0019838	114	8	1.22857	6.51164	3.0077e-05	0.00129878	1277;1278;1281;1282;1289;1291;1956;7057	THBS1;COL4A1;COL5A1;EGFR;COL1A1;COL3A1;COL6A1;COL1A2	geneontology_Molecular_Function
637	GO:0061135	endopeptidase regulator activity	http://amigo.geneontology.org/amigo/term/GO:0061135	123	8	1.32556	6.03518	5.19545e-05	0.00214595	871;1293;5054;5270;6423;6695;7078;7980	SERPINH1;SPOCK1;SERPINE1;TIMP3;SERPINE2;COL6A3;SFRP2;TFPI2	geneontology_Molecular_Function
638	GO:0048018	receptor ligand activity	http://amigo.geneontology.org/amigo/term/GO:0048018	349	13	3.76114	3.45639	9.2503e-05	0.00366158	374;1114;2200;3624;3625;5744;6423;6696;7424;8614;10512;22943;56034	STC2;INHBA;PDGFC;DKK1;PTHLH;SEMA3C;INHBB;VEGFC;SFRP2;FBN1;SPP1;CHGB;AREG	geneontology_Molecular_Function
639	GO:0004175	endopeptidase activity	http://amigo.geneontology.org/amigo/term/GO:0004175	283	11	3.04987	3.60671	0.000228897	0.00869809	2152;2191;4312;4313;4316;4319;4320;4322;5328;8038;11098	FAP;ADAM12;PLAU;PRSS23;MMP2;MMP7;MMP13;MMP10;F3;MMP11;MMP1	geneontology_Molecular_Function
640	GO:0004866	endopeptidase inhibitor activity	http://amigo.geneontology.org/amigo/term/GO:0004866	117	7	1.2609	5.55159	0.000261045	0.00953819	871;1293;5054;5270;6695;7078;7980	SERPINH1;SPOCK1;SERPINE1;TIMP3;SERPINE2;COL6A3;TFPI2	geneontology_Molecular_Function
641	GO:0030414	peptidase inhibitor activity	http://amigo.geneontology.org/amigo/term/GO:0030414	119	7	1.28245	5.45829	0.000289704	0.0101933	871;1293;5054;5270;6695;7078;7980	SERPINH1;SPOCK1;SERPINE1;TIMP3;SERPINE2;COL6A3;TFPI2	geneontology_Molecular_Function
642	GO:0005179	hormone activity	http://amigo.geneontology.org/amigo/term/GO:0005179	91	6	0.9807	6.11808	0.000433205	0.014698	1114;2200;3624;3625;5744;8614	STC2;INHBA;PTHLH;INHBB;FBN1;CHGB	geneontology_Molecular_Function
643	GO:0048019	receptor antagonist activity	http://amigo.geneontology.org/amigo/term/GO:0048019	15	3	0.161654	18.5582	0.000504246	0.0165184	10468;22943;27122	DKK3;DKK1;FST	geneontology_Molecular_Function
644	GO:0070011	peptidase activity, acting on L-amino acid peptides	http://amigo.geneontology.org/amigo/term/GO:0070011	392	12	4.22455	2.84054	0.00102182	0.0318923	165;2152;2191;4312;4313;4316;4319;4320;4322;5328;8038;11098	FAP;ADAM12;PLAU;PRSS23;MMP2;AEBP1;MMP7;MMP13;MMP10;F3;MMP11;MMP1	geneontology_Molecular_Function
645	GO:0030547	receptor inhibitor activity	http://amigo.geneontology.org/amigo/term/GO:0030547	19	3	0.204761	14.6512	0.0010407	0.0318923	10468;22943;27122	DKK3;DKK1;FST	geneontology_Molecular_Function
646	GO:0046332	SMAD binding	http://amigo.geneontology.org/amigo/term/GO:0046332	73	5	0.786715	6.35554	0.00111343	0.0330551	1278;1281;1290;8091;56937	HMGA2;PMEPA1;COL5A2;COL3A1;COL1A2	geneontology_Molecular_Function
647	GO:0008233	peptidase activity	http://amigo.geneontology.org/amigo/term/GO:0008233	404	12	4.35387	2.75617	0.0013241	0.0381181	165;2152;2191;4312;4313;4316;4319;4320;4322;5328;8038;11098	FAP;ADAM12;PLAU;PRSS23;MMP2;AEBP1;MMP7;MMP13;MMP10;F3;MMP11;MMP1	geneontology_Molecular_Function
648	GO:0001968	fibronectin binding	http://amigo.geneontology.org/amigo/term/GO:0001968	21	3	0.226315	13.2558	0.00140619	0.0392907	3688;6423;7057	THBS1;ITGB1;SFRP2	geneontology_Molecular_Function
