# Supplementary material for: Mitochondrial-related genes markers that predict survival in patients with head and neck squamous cell carcinoma affect immunomodulation through hypoxia, glycolysis, and angiogenesis pathways
Source: Aging (Albany NY). 2023 Oct 4;15(19):10347–69. doi: 10.18632/aging.205081 (PMC10599748; doi:10.18632/aging.205081)
Supplement: Supplementary Table 8 [file aging-15-205081-s008.xlsx]

## Sheet: Supplementary Table 8
Supplementary Table 8. Results of one-way Cox analysis of differential genes.
Tag	p.value	HR	Low 95%CI	High 95%CI
BIRC5	0.026	1.22	1.024	1.454
UBE2C	0.06	1.167	0.994	1.372
CD320	0.608	0.962	0.83	1.116
GINS2	0.433	1.063	0.913	1.238
UBE2T	0.085	1.136	0.983	1.314
AURKB	0.765	1.022	0.886	1.178
TRIP13	0.288	1.082	0.936	1.25
RFC4	0.503	1.047	0.915	1.199
PIMREG	0.397	1.054	0.933	1.191
MELTF	0.146	1.075	0.975	1.185
RNF222	0.054	0.91	0.826	1.002
KRT8	0.015	1.075	1.014	1.138
EPCAM	0.123	1.06	0.984	1.141
CMBL	0.263	1.069	0.951	1.2
RAC3	0.851	1.009	0.916	1.113
VSIG10L	0.289	0.955	0.878	1.04
S100A9	0.139	0.955	0.897	1.015
SPINK5	0.003	0.908	0.852	0.968
KRT18	0.005	1.164	1.046	1.295
S100A8	0.085	0.951	0.899	1.007
FAM241B	0.009	1.181	1.043	1.337
PRSS27	0.034	0.914	0.842	0.993
ISYNA1	0.629	1.022	0.936	1.116
NCCRP1	0.038	0.938	0.883	0.996
KRT78	0.039	0.939	0.884	0.997
SPINK7	0.018	0.937	0.888	0.989
LYNX1	0.012	0.909	0.844	0.979
CNFN	0.009	0.931	0.881	0.982
SDR9C7	0.162	0.955	0.895	1.019
CLDN17	0.497	0.973	0.898	1.054
SIX4	0.619	1.029	0.918	1.154
SPRR2A	0.125	0.964	0.92	1.01
ENDOU	0.012	0.899	0.827	0.977
TGM5	0.461	0.962	0.868	1.066
MEST	0.656	1.026	0.918	1.146
C10orf99	0.264	0.968	0.913	1.025
ZNF185	0.587	0.969	0.864	1.086
LYPD3	0.057	0.912	0.83	1.003
SCEL	0.283	0.962	0.897	1.032
CYSRT1	0.078	0.94	0.877	1.007
RCOR2	0.297	1.059	0.951	1.18
PYCR1	0.287	1.059	0.953	1.178
KRT6C	0.652	0.99	0.946	1.035
S100A7A	0.184	0.967	0.919	1.016
KPRP	0.203	0.958	0.897	1.023
LIPK	0.518	0.969	0.88	1.067
BPIFC	0.406	0.963	0.881	1.053
PLA2G4D	0.096	0.922	0.838	1.014
GDPD3	0.072	0.907	0.816	1.009
SPNS2	0.023	0.881	0.79	0.983
SPRR2E	0.105	0.965	0.925	1.007
LYPD5	0.091	0.924	0.844	1.013
STEAP4	0.586	0.976	0.894	1.065
IVL	0.36	0.973	0.919	1.031
BNIPL	0.045	0.912	0.834	0.998
CSTB	0.397	0.954	0.854	1.065
AQP3	0.226	0.961	0.9	1.025
DSC2	0.485	0.966	0.877	1.065
BICDL2	0.017	0.878	0.789	0.977
CLIC3	0.369	0.964	0.891	1.044
ATP10B	0.08	0.9	0.8	1.013
SLC6A14	0.107	0.942	0.877	1.013
RAET1E	0.273	0.951	0.868	1.041
EPGN	0.958	1.002	0.94	1.067
CDSN	0.228	0.953	0.882	1.03
SULT2B1	0.268	0.958	0.889	1.033
ENO2	0.06	1.098	0.996	1.21
STC2	0	1.247	1.124	1.384
ACER1	0.065	0.903	0.81	1.006
SPRR2B	0.073	0.961	0.921	1.004
PLA2G4E	0.203	0.957	0.893	1.024
A2ML1	0.019	0.929	0.874	0.988
DEFB4A	0.18	0.969	0.924	1.015
SPRR2F	0.056	0.955	0.911	1.001
HAL	0.105	0.906	0.804	1.021
SLURP1	0.05	0.956	0.913	1
KRT80	0.069	0.925	0.85	1.006
WFDC12	0.184	0.966	0.917	1.017
LCE3E	0.433	0.981	0.936	1.029
MAB21L4	0.061	0.929	0.86	1.003
PGLYRP4	0.056	0.925	0.855	1.002
S100A12	0.267	0.968	0.915	1.025
SPRR2D	0.421	0.979	0.93	1.031
PPL	0.409	0.96	0.871	1.058
HOPX	0.021	0.901	0.824	0.985
ABCA12	0.757	0.985	0.896	1.083
CRCT1	0.266	0.973	0.928	1.021
TENT5B	0.426	0.968	0.894	1.048
ZNF750	0.324	0.955	0.87	1.047
ANKRD22	0.055	0.906	0.818	1.002
SPRR1B	0.795	0.993	0.942	1.046
DUSP9	0.017	1.115	1.019	1.219
GSDMA	0.447	0.973	0.908	1.044
PGLYRP3	0.496	0.974	0.903	1.05
VSIG8	0.098	0.94	0.874	1.011
TMPRSS11D	0.058	0.943	0.887	1.002
DSG1	0.547	0.986	0.943	1.031
KRT1	0.902	0.998	0.963	1.034
IL36A	0.037	0.938	0.883	0.996
PDZK1IP1	0.107	0.947	0.887	1.012
HMGA2	0.005	1.128	1.038	1.226
TMPRSS11F	0.18	0.937	0.853	1.03
GJB2	0.317	1.038	0.965	1.117
LCE2D	0.08	0.911	0.82	1.011
IL36RN	0.101	0.95	0.895	1.01
RPTN	0.087	0.946	0.887	1.008
ALOX12B	0.043	0.937	0.879	0.998
KRT2	0.327	0.964	0.896	1.037
KRT6B	0.643	0.986	0.929	1.047
LCE2C	0.079	0.923	0.845	1.009
HEY1	0.288	1.048	0.961	1.143
SLPI	0.115	0.944	0.878	1.014
MUC15	0.171	0.942	0.864	1.026
PLA2G4F	0.254	0.945	0.859	1.041
S100A7	0.392	0.982	0.942	1.024
LCE2A	0.062	0.918	0.839	1.004
SPRR1A	0.233	0.972	0.928	1.018
SPRR2G	0.57	0.989	0.95	1.028
LCE3A	0.095	0.958	0.911	1.007
CSTA	0.01	0.901	0.832	0.976
TGM1	0.822	0.993	0.937	1.053
LCE3D	0.388	0.981	0.939	1.025
CRNN	0.189	0.973	0.933	1.014
IL1RN	0.407	0.962	0.878	1.054
ALDH3B2	0.709	0.984	0.906	1.069
ANKRD35	0.075	0.915	0.831	1.009
FLG	0.173	0.936	0.851	1.029
SERPINB13	0.645	0.983	0.913	1.058
MLF1	0.862	0.993	0.915	1.078
FAM25A	0.285	0.974	0.929	1.022
RDH12	0.504	0.977	0.911	1.047
KRT16	0.341	0.972	0.916	1.031
LCE2B	0.126	0.936	0.86	1.019
DKK1	0	1.163	1.088	1.242
FKBP10	0.148	1.067	0.977	1.166
SLC5A1	0.113	0.931	0.852	1.017
PNCK	0.576	1.025	0.939	1.12
SBSN	0.434	0.982	0.937	1.028
B4GALNT4	0.454	1.032	0.95	1.122
SLC39A2	0.749	1.014	0.931	1.105
NUDT11	0.009	1.125	1.03	1.23
CYP4F22	0.609	0.982	0.917	1.052
GRHL3	0.037	0.911	0.835	0.994
TGM3	0.337	0.98	0.941	1.021
KRT10	0.869	0.995	0.94	1.054
KLK12	0.058	0.948	0.897	1.002
SERPINB3	0.669	1.012	0.958	1.069
WFDC5	0.336	0.965	0.897	1.038
KLK7	0.918	0.997	0.947	1.051
THEM5	0.029	0.908	0.833	0.99
DMKN	0.536	1.021	0.955	1.092
UCHL1	0.233	1.037	0.977	1.101
TMPRSS11E	0.58	0.984	0.928	1.043
LCE1A	0.179	0.947	0.876	1.025
C1QTNF12	0.98	1.001	0.928	1.08
KRTCAP3	0.289	1.042	0.965	1.126
CYP2C18	0.096	0.932	0.859	1.012
RPL39L	0.105	1.067	0.987	1.154
KLK13	0.916	0.997	0.947	1.05
PRR9	0.701	0.989	0.936	1.046
SERPINB4	0.963	0.999	0.946	1.054
PI3	0.926	0.998	0.954	1.044
CCDC8	0.901	1.005	0.928	1.088
POF1B	0.151	0.95	0.885	1.019
PNLIPRP3	0.709	1.012	0.949	1.08
RHCG	0.147	0.965	0.919	1.013
GJB6	0.195	1.041	0.98	1.106
LY6G6C	0.516	0.98	0.924	1.041
SCNN1B	0.047	0.921	0.849	0.999
CEACAM6	0.098	0.948	0.891	1.01
PLA2G3	0.018	0.909	0.84	0.984
CWH43	0.288	0.965	0.904	1.03
TSPAN1	0.871	1.006	0.941	1.075
KLK6	0.636	0.987	0.936	1.041
CLCA4	0.076	0.939	0.876	1.007
HEPHL1	0.86	0.995	0.939	1.054
KRTDAP	0.698	0.992	0.954	1.032
CAPNS2	0.929	0.997	0.926	1.073
SPRR3	0.055	0.964	0.928	1.001
APOBEC3A	0.128	0.942	0.872	1.017
TMEM45B	0.217	0.956	0.889	1.027
MAL	0.158	0.962	0.913	1.015
PADI3	0.174	1.043	0.981	1.109
FABP5	0.788	1.01	0.94	1.084
DEFB1	0.006	0.919	0.864	0.976
BARX1	0.043	1.078	1.002	1.16
LOR	0.531	0.977	0.908	1.051
CA9	0.305	1.034	0.97	1.103
NIPAL4	0.229	1.05	0.97	1.137
ASPRV1	0.077	0.95	0.898	1.005
LCE3C	0.107	0.937	0.866	1.014
FAM83C	0.038	0.926	0.861	0.996
CEACAM7	0.123	0.94	0.868	1.017
LYPD2	0.035	0.945	0.897	0.996
DSC1	0.288	0.967	0.908	1.029
SPP1	0.044	1.058	1.001	1.118
CST6	0.942	1.003	0.935	1.075
KLK11	0.621	0.983	0.92	1.051
AC011473.4	0.7	0.987	0.922	1.056
KRT24	0.041	0.943	0.891	0.998
SPINK6	0.002	0.917	0.869	0.968
CEACAM5	0.062	0.95	0.901	1.003
MUC21	0.373	0.971	0.911	1.035
KLK10	0.707	1.012	0.953	1.074
SPRR4	0.169	0.962	0.91	1.017
KLK8	0.479	1.023	0.961	1.088
LY6D	0.358	0.973	0.918	1.032
LCN2	0.248	0.965	0.909	1.025
KRT13	0.125	0.971	0.934	1.008
IL36G	0.488	0.978	0.918	1.042
PRSS21	0.821	1.007	0.948	1.069
CASP14	0.737	1.008	0.963	1.055
FGFBP2	0.894	1.004	0.947	1.065
AKR1B10	0.622	1.014	0.959	1.072
KRT19	0.968	1.001	0.966	1.037
GPC3	0.229	1.036	0.978	1.098
KRT4	0.531	1.013	0.973	1.054
KLK5	0.949	1.001	0.958	1.047
CALML5	0	0.91	0.869	0.952
KRT75	0.786	1.007	0.955	1.062
WFDC2	0.562	0.986	0.938	1.035
NTS	0.971	1.001	0.961	1.042
GPX2	0.069	1.048	0.996	1.102
KLK14	0.148	0.962	0.913	1.014
PCDHGC3	0.076	1.097	0.99	1.215
ADCY7	0.843	1.014	0.881	1.168
MYO5A	0.408	1.06	0.923	1.218
KIRREL1	0.078	1.119	0.987	1.268
TENM2	0.016	1.107	1.019	1.202
COL12A1	0.85	1.008	0.925	1.099
BCL9L	0.744	1.022	0.897	1.164
MCRIP2	0.781	0.978	0.837	1.143
TIMP3	0.171	1.073	0.97	1.185
EFNB2	0	1.346	1.178	1.537
VCL	0.048	1.194	1.002	1.423
SEC24C	0.354	1.065	0.932	1.217
ENAH	0.602	1.044	0.889	1.226
MN1	0.082	1.106	0.987	1.238
PAFAH1B3	0.458	0.942	0.805	1.103
LATS2	0.131	1.141	0.962	1.355
TGFBR2	0.862	1.011	0.894	1.143
CPEB4	0.779	1.023	0.874	1.196
UBXN11	0.018	0.83	0.711	0.969
ENTPD7	0.178	1.1	0.958	1.264
F2RL1	0	1.242	1.101	1.401
NFAT5	0.602	1.04	0.899	1.203
MXD3	0.044	0.845	0.717	0.996
DYNC1LI2	0.174	1.122	0.95	1.325
SIGIRR	0.094	0.877	0.752	1.022
MACF1	0.675	0.966	0.822	1.135
WNK1	0.843	0.985	0.844	1.148
MICAL2	0.133	1.097	0.972	1.238
PRRG1	0.044	1.178	1.005	1.38
MYOF	0.039	1.177	1.009	1.373
WDR34	0.264	0.913	0.778	1.071
ZNF541	0	0.768	0.666	0.886
ATP10D	0.294	1.084	0.933	1.26
ACTN1	0.007	1.199	1.051	1.367
C8G	0.019	0.846	0.735	0.973
KLF7	0.021	1.189	1.026	1.377
PCP2	0.005	0.788	0.667	0.931
DHDH	0.887	1.01	0.876	1.166
NOCT	0.019	1.184	1.029	1.363
NRIP1	0.219	1.082	0.954	1.227
INHBA	0.003	1.126	1.042	1.216
IRS1	0.215	1.077	0.958	1.212
THBS1	0.002	1.143	1.049	1.246
MYO1B	0.006	1.204	1.055	1.374
EML1	0.407	1.055	0.93	1.196
F2R	0.845	1.012	0.901	1.137
AHNAK2	0.198	1.072	0.964	1.191
SEMA3C	0.004	1.152	1.047	1.268
MYH10	0.024	1.154	1.019	1.307
FAP	0.03	1.112	1.01	1.224
CENPM	0.814	1.018	0.88	1.176
CLMP	0.518	1.033	0.936	1.139
NAV1	0.393	1.063	0.924	1.223
MSN	0.231	1.099	0.941	1.284
AHNAK	0.497	1.052	0.909	1.218
CAP2	0.021	1.143	1.02	1.28
ADAM17	0.077	1.133	0.986	1.302
FAM83B	0.859	0.99	0.89	1.102
NID2	0.956	0.997	0.904	1.1
ITGB1	0.161	1.088	0.967	1.224
NID1	0.17	1.066	0.973	1.167
AL035461.3	0.048	0.86	0.74	0.999
MFAP3	0.47	1.057	0.91	1.228
CDK6	0.015	1.16	1.03	1.308
CDH13	0.009	1.151	1.036	1.277
HTR7	0.039	1.101	1.005	1.206
ASAP2	0.197	1.09	0.956	1.242
TBC1D14	0.388	0.939	0.815	1.083
ULBP3	0.084	1.117	0.985	1.267
COL5A2	0.533	1.026	0.947	1.112
TSHZ3	0.379	1.059	0.932	1.202
MXRA5	0.339	1.04	0.959	1.128
FBLIM1	0.175	1.106	0.956	1.28
GCHFR	0.104	0.9	0.793	1.022
TRIO	0.615	1.039	0.896	1.204
EDNRA	0.971	1.002	0.896	1.121
HIF1A	0.344	1.071	0.929	1.234
CALD1	0.335	1.062	0.939	1.201
LIMA1	0.015	1.214	1.039	1.419
MISP3	0.093	0.886	0.769	1.02
COL4A1	0.81	1.014	0.907	1.132
ZNF770	0.994	1	0.893	1.118
SYNE4	0.066	0.888	0.783	1.008
COL5A1	0.367	1.038	0.957	1.127
ITGA5	0.001	1.204	1.081	1.341
ARHGAP4	0.001	0.844	0.761	0.936
MIOX	0.191	0.9	0.769	1.054
SORCS2	0.212	1.062	0.966	1.168
SYNC	0.174	1.099	0.959	1.26
SIRPA	0.358	1.066	0.93	1.221
GTF2I	0.965	1.003	0.878	1.146
ZBED6	0.422	0.954	0.849	1.071
EVC	0.5	1.047	0.916	1.196
ITPRID2	0.113	1.128	0.972	1.308
HSPA12A	0.148	1.095	0.968	1.239
SYCE2	0.075	0.869	0.745	1.014
SAMD9	0.514	1.033	0.937	1.139
ZFR2	0.002	0.75	0.626	0.898
ADGRA2	0.559	0.968	0.867	1.08
SLC7A1	0.124	1.118	0.97	1.287
GJA1	0.323	1.051	0.952	1.161
CLCA2	0.176	1.064	0.973	1.164
IL1R1	0.968	1.003	0.879	1.144
NIPAL1	0.517	1.047	0.911	1.203
SYNGR3	0.022	0.878	0.786	0.981
E2F1	0.277	0.931	0.818	1.059
C19orf57	0.001	0.766	0.658	0.893
USP34	0.62	0.967	0.845	1.105
SULF2	0.35	1.05	0.948	1.163
YBX2	0.07	0.906	0.815	1.008
TNC	0.638	1.018	0.945	1.096
VGLL3	0.49	1.045	0.922	1.186
ZNF469	0.96	1.003	0.9	1.118
MMP2	0.488	1.031	0.945	1.126
DCBLD1	0.007	1.196	1.049	1.363
CRIM1	0.132	1.113	0.968	1.279
DMRTA2	0.019	0.894	0.814	0.982
MGLL	0.605	1.034	0.911	1.175
SLC24A3	0.681	1.021	0.923	1.13
COL5A3	0.616	0.974	0.877	1.081
BCAT1	0.04	1.103	1.004	1.212
ETS1	0.699	1.025	0.905	1.161
PLXDC2	0.724	1.021	0.909	1.147
COL6A3	0.668	0.983	0.909	1.063
CHST11	0.071	1.129	0.99	1.288
PRSS23	0.011	1.145	1.031	1.272
SYCP2	0.003	0.853	0.768	0.947
NUPR1	0.203	0.938	0.849	1.035
F13A1	0.301	1.043	0.963	1.128
MAN1A1	0.494	0.961	0.857	1.077
FN1	0.056	1.065	0.999	1.136
COL3A1	0.796	1.009	0.942	1.081
HSPG2	0.682	0.981	0.896	1.075
CRISPLD2	0.966	1.002	0.893	1.125
TSTD1	0.852	1.011	0.901	1.135
ADAM12	0.637	1.021	0.936	1.115
SERPINE1	0.003	1.127	1.041	1.22
SPOCK1	0.002	1.131	1.048	1.222
MET	0.016	1.174	1.031	1.338
ADAMTS15	0.016	1.117	1.021	1.223
COL1A1	0.706	1.014	0.943	1.091
FLRT2	0.191	1.079	0.963	1.211
KCNJ15	0.002	1.212	1.074	1.368
KHK	0.902	0.992	0.875	1.125
ANTXR2	0.089	1.103	0.985	1.234
HEG1	0.453	0.954	0.844	1.079
CDH11	0.551	1.027	0.94	1.123
FERMT1	0.512	1.041	0.923	1.174
SRPX	0	1.164	1.069	1.268
CAV1	0.02	1.115	1.017	1.222
FSTL1	0.409	1.044	0.943	1.156
ADAMTS12	0.949	1.003	0.912	1.103
NT5E	0.003	1.135	1.045	1.233
GASK1B	0.403	1.047	0.941	1.165
LTBP1	0.965	1.002	0.909	1.105
BASP1	0.008	1.148	1.037	1.27
THSD1	0.024	1.133	1.016	1.263
FLRT3	0.477	1.025	0.957	1.098
ARSJ	0.014	1.151	1.029	1.288
TLL1	0.056	1.113	0.997	1.242
TENM3	0.317	1.054	0.951	1.167
DYSF	0.427	1.051	0.93	1.188
BNC1	0.471	1.042	0.932	1.166
PCDH7	0.974	1.001	0.919	1.092
RHBDL1	0.207	0.928	0.825	1.042
CYP26B1	0.874	0.992	0.902	1.091
MBOAT2	0.064	1.119	0.993	1.26
TCP11	0.005	0.811	0.701	0.938
TCEA3	0.023	0.89	0.804	0.984
RHPN1	0.846	0.99	0.892	1.098
VCAN	0.605	1.021	0.944	1.103
KRT6A	0.336	1.048	0.953	1.152
LPAR3	0.185	1.081	0.963	1.213
PPP2R2C	0.712	0.984	0.904	1.071
TLX3	0.081	0.915	0.827	1.011
MEI1	0.003	0.837	0.745	0.94
NPR2	0.456	1.041	0.937	1.157
GLT8D2	0.801	1.014	0.907	1.135
ADAMTS2	0.473	0.968	0.885	1.059
DSP	0.361	0.953	0.859	1.057
THBD	0.142	1.07	0.978	1.171
COL1A2	0.965	1.002	0.931	1.077
FILIP1L	0.212	0.927	0.824	1.044
RIBC2	0.07	0.902	0.807	1.008
MSX2	0.025	1.148	1.018	1.296
KANK4	0.373	1.042	0.951	1.142
PDGFRB	0.337	0.952	0.862	1.052
SLC16A2	0.047	1.105	1.001	1.219
NOXA1	0.334	0.947	0.848	1.057
TGFB2	0.994	1	0.891	1.123
DSG3	0.694	0.98	0.885	1.085
DACT1	0.067	1.094	0.994	1.205
MT-ND4L	0.328	1.061	0.942	1.194
NPM2	0.388	0.949	0.842	1.069
LAMA4	0.801	0.985	0.877	1.106
LOXL2	0.167	1.075	0.97	1.19
PDGFC	0.074	1.113	0.99	1.252
DAB2	0.659	1.027	0.914	1.153
COL4A2	0.982	1.001	0.887	1.13
MMP13	0.207	1.029	0.984	1.077
ANO1	0.003	1.117	1.038	1.201
SHISAL1	0.522	0.969	0.881	1.066
MSRB3	0.159	1.085	0.969	1.216
CDKN2C	0.103	0.916	0.824	1.018
SHANK2	0.002	1.177	1.061	1.306
MAFB	0.214	0.933	0.837	1.041
TGFBI	0.017	1.104	1.018	1.198
TAF7L	0.024	0.84	0.722	0.977
LAMA2	0.849	0.989	0.881	1.11
SLITRK6	0.026	1.088	1.01	1.171
TNS3	0.608	1.031	0.917	1.159
F3	0.012	1.109	1.023	1.202
ITGA6	0.053	1.113	0.998	1.241
SMC1B	0.019	0.874	0.781	0.978
CA12	0.023	1.125	1.016	1.246
PXDN	0.256	1.054	0.963	1.154
PMEPA1	0.088	1.096	0.986	1.217
FAM3B	0.049	0.928	0.861	1
THBS2	0.597	1.021	0.945	1.104
MFAP5	0.134	1.056	0.983	1.133
FBN2	0.459	1.03	0.953	1.113
HOXC13	0.011	1.158	1.034	1.296
CAMK2N1	0	1.27	1.141	1.414
STAG3	0.008	0.85	0.754	0.958
PYGL	0.001	1.221	1.081	1.379
PCDHGC5	0.515	1.036	0.931	1.154
ANKRD65	0.061	0.912	0.828	1.004
FBN1	0.853	0.992	0.914	1.077
GPR143	0.092	0.905	0.805	1.017
SLC7A5	0.01	1.16	1.036	1.3
ARSI	0.015	1.117	1.022	1.221
FAT1	0.106	1.086	0.983	1.201
AKAP12	0.08	1.101	0.989	1.225
TIMP2	0.939	0.996	0.903	1.099
SLC6A11	0.326	1.045	0.957	1.141
COL11A1	0.148	1.045	0.984	1.11
LRRC15	0.881	1.005	0.939	1.077
SMIM22	0.423	0.969	0.897	1.047
GPR68	0.856	1.01	0.903	1.131
MMP10	0.077	1.047	0.995	1.102
EGFR	0.04	1.113	1.005	1.232
POSTN	0.155	1.048	0.982	1.119
SPON1	0.44	0.965	0.882	1.056
DKK3	0.025	1.137	1.016	1.273
COL8A1	0.777	0.988	0.906	1.076
NMU	0.669	0.981	0.898	1.072
TNFRSF18	0.008	0.877	0.796	0.966
PAQR5	0.253	1.06	0.959	1.173
GREM1	0.962	1.002	0.914	1.099
LAMA3	0.102	1.074	0.986	1.17
LTBP2	0.728	0.981	0.879	1.095
PTHLH	0.211	1.046	0.975	1.123
SERPINE2	0.252	1.05	0.966	1.141
DCN	0.951	0.997	0.913	1.089
GPR1	0.263	0.944	0.852	1.044
MME	0.003	1.143	1.046	1.249
MMP1	0.098	1.051	0.991	1.114
MALL	0.574	1.03	0.928	1.144
M1AP	0.021	0.875	0.782	0.981
TMSB15A	0.347	0.953	0.863	1.053
SLC7A8	0.136	1.072	0.978	1.175
TNFAIP6	0.044	1.107	1.003	1.222
AMIGO2	0.005	1.142	1.04	1.254
COL6A1	0.64	0.978	0.893	1.072
GPC6	0.156	1.072	0.974	1.181
APCDD1L	0.025	1.114	1.013	1.224
VEGFC	0.008	1.118	1.029	1.214
BGN	0.09	1.084	0.987	1.19
SFRP2	0.056	1.067	0.998	1.14
SPARC	0.69	1.019	0.93	1.116
CSPG4	0.899	0.995	0.919	1.077
GALNT6	0.761	1.015	0.924	1.114
GOLGA7B	0.364	1.043	0.953	1.141
MSC	0.047	1.103	1.001	1.214
MRC1	0.543	1.03	0.936	1.135
SLC22A3	0.671	1.018	0.938	1.104
SYT7	0.012	1.131	1.027	1.245
COL10A1	0.226	1.04	0.976	1.11
WNT7A	0	1.192	1.084	1.31
PHYHD1	0.07	0.929	0.857	1.006
MMP3	0.25	1.033	0.977	1.092
PODXL2	0.178	0.955	0.893	1.021
COL15A1	0.493	0.966	0.875	1.066
FNDC1	0.973	0.999	0.927	1.076
FOXJ1	0.083	0.919	0.836	1.011
INHBB	0.005	1.148	1.042	1.265
FLNC	0.044	1.07	1.002	1.143
EREG	0.296	1.034	0.971	1.102
LAMC2	0.037	1.091	1.005	1.184
AEBP1	0.602	1.023	0.938	1.116
IGF2	0.643	1.021	0.936	1.114
CPA4	0.297	1.039	0.967	1.115
PDPN	0.168	1.075	0.97	1.191
FZD10	0.257	1.056	0.961	1.159
CNGB1	0.842	1.008	0.93	1.094
ITGA11	0.972	0.998	0.911	1.094
CDA	0.089	1.06	0.991	1.134
NPW	0.903	0.994	0.904	1.093
SNCG	0.989	0.999	0.916	1.09
CLDN7	0.796	1.011	0.928	1.102
CLDN3	0.637	0.983	0.916	1.055
SULF1	0.398	1.034	0.956	1.119
NEFH	0.024	0.886	0.798	0.984
FIBIN	0.81	1.011	0.925	1.105
F2RL2	0.261	0.947	0.861	1.042
DIO2	0.581	0.973	0.884	1.072
MYOM3	0.636	1.021	0.936	1.114
NPPC	0.335	0.954	0.868	1.049
EDIL3	0.206	1.057	0.97	1.152
COL4A6	0.142	1.063	0.98	1.153
LUM	0.571	0.976	0.897	1.062
KREMEN2	0.797	1.011	0.931	1.097
TJP3	0.006	0.876	0.797	0.964
TMEM45A	0.448	0.968	0.889	1.053
IGFL2	0.943	0.997	0.926	1.074
FAM83A	0.572	1.022	0.948	1.101
FHL1	0.06	1.069	0.997	1.146
CA2	0.994	1	0.93	1.076
POPDC3	0.002	1.141	1.048	1.243
CEL	0.878	1.005	0.942	1.073
CAVIN4	0.047	1.078	1.001	1.161
SLC10A6	0.297	0.955	0.877	1.041
XIRP1	0.082	1.069	0.992	1.152
AREG	0	1.138	1.059	1.224
KRT14	0.386	1.026	0.968	1.087
CASQ2	0.025	1.066	1.008	1.128
NEB	0.034	1.071	1.005	1.141
SLC7A11	0.032	1.085	1.007	1.169
EPHX3	0	0.899	0.848	0.952
PLAC8	0.097	0.935	0.864	1.012
CDKN2A	0.01	0.932	0.883	0.983
ACTC1	0.016	1.052	1.01	1.096
CHRNA1	0.062	1.066	0.997	1.139
BEX2	0.641	1.017	0.947	1.092
COL17A1	0.878	1.006	0.935	1.082
ANKRD1	0.02	1.062	1.009	1.117
LCE1F	0.615	0.983	0.918	1.052
FOXA1	0.355	0.966	0.899	1.039
MZB1	0.001	0.894	0.835	0.956
RNASE7	0.153	1.054	0.981	1.132
NEFL	0.625	1.015	0.955	1.08
MYBPH	0.032	1.047	1.004	1.091
MYOT	0.026	1.073	1.008	1.142
MYOG	0.054	1.058	0.999	1.12
MYH1	0.043	1.054	1.002	1.109
SFRP4	0.355	1.026	0.971	1.084
MYF6	0.027	1.073	1.008	1.142
SFRP1	0.01	0.918	0.86	0.979
HSPB3	0.022	1.077	1.011	1.148
DES	0.015	1.044	1.008	1.081
IGFL3	0.241	1.037	0.976	1.102
KLHL41	0.037	1.053	1.003	1.105
NEFM	0.476	1.024	0.959	1.095
ACTN2	0.049	1.05	1	1.103
CSRP3	0.048	1.044	1	1.09
LMOD2	0.07	1.058	0.995	1.125
ACTA1	0.023	1.04	1.005	1.076
HSPB7	0.019	1.067	1.011	1.126
MYL1	0.022	1.046	1.007	1.086
MSLN	0.371	0.975	0.922	1.031
CHGB	0	1.11	1.05	1.172
KRT7	0.731	0.989	0.93	1.052
MAGEA4	0.041	1.046	1.002	1.093
CCNA1	0.003	1.098	1.033	1.167
TNNI1	0.056	1.057	0.999	1.119
MYL2	0.024	1.047	1.006	1.089
SLN	0.042	1.047	1.002	1.094
SMPX	0.021	1.063	1.009	1.12
NRAP	0.104	1.043	0.991	1.098
MSMB	0.085	0.947	0.89	1.007
MYH2	0.15	1.031	0.989	1.076
MYBPC2	0.093	1.045	0.993	1.1
CKM	0.02	1.048	1.007	1.089
MYH7	0.116	1.04	0.99	1.092
RPS4Y1	0.018	0.953	0.916	0.992
THBS4	0.573	1.016	0.96	1.076
IGFL1	0.164	1.038	0.985	1.094
FDCSP	0.001	0.936	0.899	0.974
MYLPF	0.1	1.04	0.992	1.09
ALDH3A1	0.204	0.965	0.915	1.019
FABP4	0.045	1.043	1.001	1.087
P4HA1	0	1.329	1.15	1.537
SERPINH1	0.021	1.168	1.023	1.332
LAMC1	0.139	1.112	0.966	1.281
SLC39A14	0.16	1.094	0.965	1.24
LRP12	0.02	1.171	1.026	1.336
KDELR3	0.112	1.097	0.979	1.229
DSG2	0.009	1.158	1.038	1.293
GOLIM4	0.149	1.093	0.968	1.235
B4GALNT1	0.005	1.168	1.048	1.302
FERMT2	0.129	1.101	0.973	1.246
HEYL	0.438	1.05	0.929	1.186
IGF2BP2	0.004	1.161	1.047	1.287
RAI14	0.092	1.107	0.983	1.247
ERVMER34-1	0.008	1.167	1.042	1.308
PHLDB2	0.013	1.164	1.032	1.312
EVA1A	0.026	1.113	1.013	1.223
CERCAM	0.058	1.122	0.996	1.265
PLOD2	0.002	1.204	1.073	1.352
TPM1	0.044	1.115	1.003	1.24
SGCE	0.02	1.126	1.019	1.244
HAS2	0.247	1.056	0.963	1.157
SDC2	0.177	1.065	0.972	1.168
GPR176	0.49	0.964	0.87	1.069
MFAP2	0.12	1.094	0.977	1.225
PLAU	0.001	1.217	1.089	1.36
LAMB3	0.036	1.129	1.008	1.264
TMEM158	0.105	1.088	0.982	1.205
CTHRC1	0.114	1.072	0.983	1.168
MAP1B	0.292	1.054	0.956	1.162
PFN2	0.007	1.137	1.035	1.249
BSPRY	0.017	0.893	0.814	0.98
FOXC2	0.114	1.078	0.982	1.183
STC1	0.003	1.168	1.055	1.292
GPC4	0.08	1.071	0.992	1.155
GGT6	0.031	0.905	0.826	0.991
CCND1	0	1.179	1.075	1.292
DPYSL3	0.813	1.01	0.927	1.102
FUT6	0.008	0.881	0.801	0.968
TGM2	0.032	1.107	1.009	1.214
FST	0.001	1.163	1.062	1.273
MMP7	0.28	1.034	0.973	1.1
TSPAN18	0.697	1.017	0.933	1.11
HTRA3	0.175	1.064	0.973	1.164
SHISA2	0.695	1.015	0.942	1.094
PEG10	0.059	1.073	0.997	1.154
TFPI2	0.022	1.084	1.012	1.162
CXCL17	0.054	0.944	0.89	1.001
FAM3D	0.004	0.904	0.843	0.969
TMPRSS11B	0.151	0.942	0.869	1.022
MMP11	0.675	1.015	0.947	1.087
CD79A	0	0.868	0.812	0.929
PCP4L1	0.035	0.925	0.86	0.994
TMPRSS11A	0.123	0.955	0.901	1.013
S100P	0.264	0.964	0.905	1.028
IGLL5	0	0.902	0.856	0.952
PRAME	0.037	1.064	1.004	1.128
JCHAIN	0	0.898	0.854	0.945
