# Supplementary material for: Mitochondrial-related genes markers that predict survival in patients with head and neck squamous cell carcinoma affect immunomodulation through hypoxia, glycolysis, and angiogenesis pathways
Source: Aging (Albany NY). 2023 Oct 4;15(19):10347–69. doi: 10.18632/aging.205081 (PMC10599748; doi:10.18632/aging.205081)
Supplement: Supplementary Table 9 [file aging-15-205081-s009.xlsx]

## Sheet: Supplementary Table 9
Supplementary Table 9. Mitochondria-associated genes.
GO_INTRINSIC_COMPONENT_OF_MITOCHONDRIAL_OUTER_MEMBRANE	GO_OUTER_MITOCHONDRIAL_MEMBRANE_PROTEIN_COMPLEX	GO_MITOCHONDRIAL_MATRIX	GO_MITOCHONDRIAL_MEMBRANE_PART	GO_INNER_MITOCHONDRIAL_MEMBRANE_PROTEIN_COMPLEX	GO_MITOCHONDRIAL_PART	GO_MITOCHONDRION	GO_INTRINSIC_COMPONENT_OF_MITOCHONDRIAL_INNER_MEMBRANE	GO_INTRINSIC_COMPONENT_OF_MITOCHONDRIAL_MEMBRANE	GO_MITOCHONDRIAL_ENVELOPE	GO_MITOCHONDRIAL_PROTEIN_COMPLEX	GO_MITOCHONDRIAL_PROTON_TRANSPORTING_ATP_SYNTHASE_COMPLEX_COUPLING_FACTOR_F_O_	GO_MITOCHONDRIAL_OUTER_MEMBRANE_TRANSLOCASE_COMPLEX	GO_TIM23_MITOCHONDRIAL_IMPORT_INNER_MEMBRANE_TRANSLOCASE_COMPLEX	GO_MITOCHONDRIAL_RESPIRATORY_CHAIN_COMPLEX_I	GO_MITOCHONDRIAL_RESPIRATORY_CHAIN_COMPLEX_IV	GO_MITOCHONDRIAL_ALPHA_KETOGLUTARATE_DEHYDROGENASE_COMPLEX	GO_MITOCHONDRIAL_CRISTA	GO_MITOCHONDRIAL_TRICARBOXYLIC_ACID_CYCLE_ENZYME_COMPLEX	GO_EXTRINSIC_COMPONENT_OF_MITOCHONDRIAL_INNER_MEMBRANE	GO_MITOCHONDRIAL_INTERMEMBRANE_SPACE_PROTEIN_TRANSPORTER_COMPLEX	GO_TIM22_MITOCHONDRIAL_IMPORT_INNER_MEMBRANE_INSERTION_COMPLEX	GO_MITOCHONDRIA_ASSOCIATED_ENDOPLASMIC_RETICULUM_MEMBRANE
ABCB6	TOMM6	TSFM	UQCRFS1P1	UQCRFS1P1	UQCRFS1P1	UQCRFS1P1	PET100	PET100	UQCRFS1P1	UQCRFS1P1	ATP5PD	TOMM6	TIMM23	NDUFC2-KCTD14	COX4I1	BCKDK	COX6B2	BCKDK	COQ7	TIMM10B	TIMM10B	RAB32
TOMM40	TOMM40	PPIF	PET100	TIMM23	KIF28P	KIF28P	TIMM23	TIMM23	KIF28P	TOMM6	ATP5MG	TOMM40	TIMM23B	PARK7	COX6A1	DBT	ATPSCKMT	DBT	TAMM41	TIMM13	TIMM10	PDZD8
CPT1A	MTX2	LRPPRC	TOMM6	NDUFC2-KCTD14	PET100	PET100	TIMM23B	ABCB6	PET100	TIMM23	ATP5MGL	TOMM20L	TIMM17B	NDUFA11	COX6A2	BCKDHA	LYN	BCKDHA	OPA1	TIMM10	TIMM22	ACSL4
FUNDC1	SAMM50	TRAP1	TIMM23	TIMM23B	PLA2G4B	PLA2G4B	TIMM17B	TIMM23B	PLA2G4B	NDUFC2-KCTD14	MT-ATP8	TOMM5	TIMM17A	NDUFS7	MT-CO1	BCKDHB	OPA1	BCKDHB	COQ6	TIMM9	AGK	ATG14
DMPK	MTX3	AASS	NDUFC2-KCTD14	PPIF	BCL2L10	BCL2L10	TIMM17A	TIMM17B	BCL2L10	TIMM23B	ATP5PB	TOMM7	DNAJC19	MT-ND1	NDUFA4	MRPS36	STAR	SUCLG2	PAM16	TIMM8B	TIMM29	RAB38
TOMM20L	TOMM20L	DHRS2	ABCB6	TIMM17B	BCL2L11	BCL2L11	AFG3L2	MICU1	BCL2L11	PPIF	ATP5MC1	TOMM22	GRPEL2	MT-ND2	NDUFA4L2		SLC8B1	MRPS36	COQ4			ZFYVE1
FIS1	TOMM5	MRPS31	TIMM23B	MICU1	TOMM6	TOMM6	IMMT	TIMM17A	TOMM6	MRPS31	ATP5MC2	PINK1	ROMO1	MT-ND3	UQCRC2				COQ3			STX17
ARMCX3	MTX1	RIDA	PPIF	TIMM17A	CMC4	CMC4	MICOS13	TOMM40	CMC4	TIMM17B	ATP5MC3	TOMM40L	TIMM10	MT-ND4	UQCRFS1				COQ8A			MBOAT7
GDAP1	TOMM7	GLYAT	COQ7	ATP5PD	TIMM23	GLYATL1B	COX11	AFG3L2	TIMM23	BCKDK	ATP5ME	TOMM20	TIMM21	MT-ND4L	C15orf48				DUSP21			CANX
RHOT1	ANKZF1	BCKDK	TIMM17B	ATP5MG	CEBPZOS	TIMM23	APOOL	IMMT	CEBPZOS	MICU1	ATP5PF	TOMM70	DNAJC15	MT-ND5	COX4I2				NDUFAF5			SERAC1
SYNJ2BP	MFN1	WARS2	MICU1	AFG3L2	NDUFC2-KCTD14	PET117	MTLN	MICOS13	NDUFC2-KCTD14	TIMM17A	ATP5MF		SLC25A6	NDUFA1	COX5A				COQ8B			FATE1
MFN1	DNAJC11	ACAA2	TIMM17A	IMMT	ABCB6	MTRNR2L5	ETFDH	CNR1	ABCB6	TOMM40			PAM16	NDUFA2					NOA1			ATG5
BAK1	TOMM22	TIMM44	TOMM40	PARK7	DNM1L	CEBPZOS	PISD	COX11	DNM1L	ATP5PD			GRPEL1	NDUFA3					COQ5			TOMM20
PINK1	PINK1	PITRM1	ATP5PD	MICOS13	ABCF2	NDUFC2-KCTD14	MPC2	CPT1A	ABCF2	MRPL28			TIMM50	NDUFA4					ATP23
FUNDC2	TOMM40L	MRPL28	ATP5MG	NDUFA11	COX17	ABCB6	COQ2	APOOL	COX17	ATP5MG				NDUFA5
BNIP3	TOMM20	TXNRD2	MTX2	DNAJC19	TIMM23B	DNM1L	COX18	FUNDC1	TIMM23B	MTX2				NDUFA6
MUL1	TOMM70	MTHFS	AFG3L2	COX4I1	TSFM	ABCF2	COA3	DMPK	PPIF	CLPX				NDUFA7
MGARP		FARS2	IMMT	COX6A1	PPIF	COX17	MPC1L	MTLN	TRAP1	MRPS30				NDUFA8
RHOT2		MTHFD2	PARK7	COX6A2	LRPPRC	TIMM23B	CHCHD10	ETFDH	SLC25A13	AFG3L2				NDUFA9
TOMM20		CLPX	LRRK2	GRPEL2	TRAP1	COL4A3BP	MICOS10	ABCB10	SLC25A15	IMMT				NDUFA10
MFN2		ME3	COX6B2	SDHAF4	AASS	PYURF	MT-CYB	PISD	COQ7	MRPL3				NDUFAB1
		MRPS30	MICOS13	APOOL	SLC25A13	TSFM	OXA1L	MPC2	MRPS31	PARK7				NDUFB1
		FASTK	NDUFA11	ROMO1	SLC25A15	PPIF	COX16	COQ2	TIMM17B	MALSU1				NDUFB2
		PRDX3	CNR1	CYC1	DHRS2	LRPPRC	MPC1	COX18	MICU1	MRPL53				NDUFB3
		ACOT2	DNAJC19	IMMP1L	COQ7	TRAP1	SLC25A3	COA3	PEMT	MRPL54				NDUFB4
		HTD2	TAMM41	MICU2	MRPS31	BCAP31	CHCHD3	SLC25A4	TIMM17A	CHCHD1				NDUFB5
		LIAS	COX4I1	TIMM10B	TIMM17B	AASS	PPOX	MPC1L	TOMM40	MRPL52				NDUFB6
		HIBADH	COX6A1	TIMM10	RIDA	SLC25A13	MCUB	TOMM20L	HAX1	MRPL10				NDUFB7
		MRPL3	COX6A2	ATP5MGL	GLYAT	SLC25A15	DNAJC11	CHCHD10	TIMM44	MICOS13				NDUFB8
		POLG2	ATPSCKMT	UQCRQ	BCKDK	NME6	COA1	MICOS10	ATP5PD	NDUFA11				NDUFB9
		CA5B	GRPEL2	TIMM21	WARS2	DHRS2	AGK	MT-CYB	VAT1	MRPL55				NDUFB10
		FDX2	COX7A1	DNAJC15	MICU1	COQ7	SLC25A19	OXA1L	MRPL28	MTERF4				NDUFC1
		HOGA1	COX7A2	SLC25A6	PEMT	MRPS31	SCO1	FIS1	TXNIP	DNAJC19				NDUFC2
		PARK7	COX7A2P2	UQCR10	TIMM17A	TIMM17B	MCUR1	COX16	ATP5MG	COX4I1				NDUFS1
		MALSU1	COX7B	TIMM22	ACAA2	RIDA	SPG7	ARMCX3	PRELID3A	COX6A1				NDUFS2
		ACSM1	SDHAF4	NDUFS7	TOMM40	GLYAT	UQCC3	MPC1	MTX2	COX6A2				NDUFS3
		TOP1MT	COX11	CHCHD10	HAX1	AKAP8	APOO	SLC25A3	MTCO2P12	GRPEL2				NDUFV1
		MRPL53	COX15	ATP5F1EP2	TIMM44	GATD3B	L2HGDH	GDAP1	YME1L1	SDHAF4				NDUFS4
		MRPL54	CPT1A	UQCRHL	ATP5PD	BCKDK	TMEM177	CHCHD3	CLPX	APOOL				NDUFS5
		THEM4	APOOL	MICOS10	VAT1	EMC8	CHCHD6	TMEM70	MRPS30	ROMO1				NDUFS6
		CHCHD1	FUNDC1	MT-ATP6	PITRM1	WARS2	TMEM11	PPOX	AFG3L2	CYC1				NDUFS8
		LRRK2	ROMO1	MT-ATP8	MRPL28	MICU1	MCU	MCUB	TOMM34	DBT				NDUFV2
		MRPL52	CYC1	MT-CO1	TXNRD2	RACK1	SMDT1	RHOT1	UQCR11	DLAT				NDUFV3
		ISCA2	COX7B2	MT-CYB	MTHFS	PEMT	SFXN1	SYNJ2BP	RAB32	DNA2				NDUFA13
		HYKK	DMPK	MT-ND1	TXNIP	TIMM17A	SCO2	MFN1	IMMT	IMMP1L				NDUFAF1
		ACSM2A	IMMP1L	MT-ND2	ATP5MG	ACAA2		DNAJC11	SLC27A3	MRPL21				NDUFB11
		EARS2	MTLN	MT-ND3	PRELID3A	TOMM40		COA1	ABCB8	MICU2				DMAC2
		MRPL10	ETFDH	MT-ND4	MTX2	ECI2		AGK	MRPL3	MRPS27				FOXRED1
		NAXE	MICU2	MT-ND4L	FARS2	HAX1		MFF	RDH13	PMPCA				NDUFA12
		MRPL55	SARM1	MT-ND5	MTCO2P12	TIMM44		BAK1	PARK7	SAMM50				WDR93
		MTERF4	ABCB10	NDUFA1	YME1L1	ATP5PD		SLC25A19	PHB2	MTG2				SNCA
		DNAJC19	NNT	NDUFA2	MTHFD2	VAT1		SCO1	SLC25A25	TIMM10B				DMAC1
		NADK2	PISD	NDUFA3	CLPX	PITRM1		BID	CIDEA	TIMM13
		GRPEL2	SAMM50	NDUFA4	ME3	OLFM4		MCUR1	PTPMT1	TIMM10
		SDHAF4	MPC2	NDUFA5	MRPS30	MRPL28		PINK1	OMA1	TIMM9
		CPS1	TIMM10B	NDUFA6	FASTK	TXNRD2		FUNDC2	SLC25A26	TIMM8B
		ADHFE1	TIMM10	NDUFA7	PRDX3	MTHFS		BNIP3	CKMT1B	MRPL46
		CREB1	ATP5MGL	NDUFA8	AFG3L2	TXNIP		SPG7	CKMT2	ATP5MGL
		PABPC5	UQCRQ	NDUFA9	TOMM34	ATP5MG		UQCC3	FAM210B	UQCRQ
		ACSM6	COQ2	NDUFA10	ACOT2	PRELID3A		APOO	COX20	MRPS28
		CS	COX18	NDUFAB1	HTD2	MTX2		MUL1	MRPL53	MRPS18B
		PPM1K	COA3	NDUFB1	UQCR11	YKT6		L2HGDH	MRPL54	MRPL42
		CYP11A1	TIMM21	NDUFB2	RAB32	FARS2		SLC8B1	THEM4	MRPL13
		CYP27A1	SLC25A4	NDUFB3	IMMT	MTCO2P12		TMEM177	CHCHD1	MRPL18
		ALDH1L2	DNAJC15	NDUFB4	SLC27A3	YME1L1		CHCHD6	SFXN2	MRPL15
		NAGS	SLC25A6	NDUFB5	LIAS	RAI1		MGARP	CLU	TIMM21
		DBT	UQCR10	NDUFB6	HIBADH	ZBTB6		TMEM11	SFXN4	MRPL22
		ECI1	TIMM22	NDUFB7	ABCB8	MTHFD2		RHOT2	LRRK2	DNAJC15
		DECR1	MTX3	NDUFB8	MRPL3	CLPX		MCU	MRPL52	SLC25A6
		MMAA	MPC1L	NDUFB9	POLG2	CD3EAP		SMDT1	SLC25A29	UQCR10
		DGUOK	NDUFS7	NDUFB10	CA5B	ADAM28		SFXN1	MRPL10	TIMM22
		DLAT	TOMM20L	NDUFC1	RDH13	ME3		TOMM20	MIEF2	HSD17B10
		DLD	CHCHD10	NDUFC2	FDX2	MRPS30		MFN2	COX6B2	HADHA
		DLST	TOMM5	NDUFS1	HOGA1	PPARGC1A		SCO2	MICOS13	MRPL58
		SARDH	LYN	NDUFS2	PARK7	JTB			CPT1C	MTX3
		DNA2	ATP5F1EP2	NDUFS3	PHB2	DHRS4			NDUFA11	NDUFS7
		ABAT	UQCRHL	NDUFV1	SLC25A25	BRD8			CNP	NSUN4
		DTYMK	MICOS10	NDUFS4	CIDEA	FASTK			CNR1	TOMM20L
		AGXT	MT-ATP6	NDUFS5	PTPMT1	PRDX3			MRPL55	CHCHD10
		ECHS1	MT-ATP8	NDUFS6	OMA1	AFG3L2			DNAJC19	TOMM5
		ACSF3	MT-CO1	NDUFS8	SLC25A26	STARD3			CHCHD4	ATP5F1EP2
		IBA57	MT-CYB	NDUFV2	MALSU1	TOMM34			TAMM41	UQCRHL
		DHFR2	MT-ND1	NDUFV3	CKMT1B	ACOT2			SPATA18	MICOS10
		PDE12	MT-ND2	ATP5F1A	CKMT2	HTD2			COX4I1	MT-ATP6
		PRIMPOL	MT-ND3	ATP5F1B	FAM210B	YWHAQ			COX5B	MT-ATP8
		AK4	MT-ND4	ATP5F1C	COX20	UQCR11			SLC9B2	MT-CO1
		ERBB4	MT-ND4L	PAM16	ACSM1	RAB32			COX6A1	MT-CYB
		ETFA	MT-ND5	NDUFA13	TOP1MT	IMMT			COX6A2	MT-ND1
		ETFB	MTX1	NDUFAF1	MRPL53	SDS			COX6B1	MT-ND2
		ALAS1	NDUFA1	ATP5F1D	MRPL54	SLC27A3			ATPSCKMT	MT-ND3
		ETFDH	NDUFA2	ATP5F1E	THEM4	LIAS			GRPEL2	MT-ND4
		ALAS2	NDUFA3	ATP5PB	CHCHD1	TDRKH			COX6C	MT-ND4L
		ALDH2	NDUFA4	ATP5MC1	SFXN2	RIPK3			COX7A1	MT-ND5
		ALDH1B1	NDUFA5	ATP5MC2	CLU	DEPP1			COX7A2	MTX1
		MRPL21	NDUFA6	ATP5MC3	SFXN4	TRIM31			COX7A2P2	NDUFA1
		FDX1	NDUFA7	ATP5ME	LRRK2	TPPP			COX7B	NDUFA2
		FDXR	NDUFA8	ATP5PF	MRPL52	HIBADH			COX7C	NDUFA3
		FECH	NDUFA9	ATP5PO	ISCA2	CAPN10			COX8A	NDUFA4
		FH	NDUFA10	NDUFB11	SLC25A29	NUDT6			SDHAF4	NDUFA5
		FASTKD2	NDUFAB1	CHCHD3	HYKK	ABCB8			COX10	NDUFA6
		DHX30	NDUFB1	MCUB	ACSM2A	AKAP10			COX11	NDUFA7
		FOXO3	NDUFB2	DMAC2	EARS2	MRPL3			COX15	NDUFA8
		MRPS27	NDUFB3	FOXRED1	MRPL10	POLG2			CPOX	NDUFA9
		PMPCA	NDUFB4	DNAJC11	MIEF2	CA5B			CPS1	NDUFA10
		LARS2	NDUFB5	AGK	COX6B2	SP140			CPT1A	NDUFAB1
		SIRT5	NDUFB6	NDUFA12	MICOS13	RDH13			CPT1B	NDUFB1
		SIRT4	NDUFB7	NDUFA4L2	CPT1C	FDX2			CPT2	NDUFB2
		SIRT3	NDUFB8	WDR93	NDUFA11	HOGA1			NDUFAF6	NDUFB3
		MLYCD	NDUFB9	BCS1L	CNP	PNKP			LETM2	NDUFB4
		TDRD7	NDUFB10	SDHA	CNR1	MTFR2			CRAT	NDUFB5
		HARS2	NDUFC1	SDHB	NAXE	PARK7			ATF2	NDUFB6
		ETHE1	NDUFC2	SDHC	MRPL55	GPN1			APOOL	NDUFB7
		ISCU	NDUFS1	SDHD	MTERF4	PHB2			FUNDC1	NDUFB8
		FPGS	NDUFS2	SNCA	DNAJC19	ACOT7			BRI3BP	NDUFB9
		ARL2BP	NDUFS3	SPG7	CHCHD4	TUSC2			ROMO1	NDUFB10
		PDSS1	NDUFV1	UQCRB	TAMM41	AZIN2			SLC25A10	NDUFC1
		ACOT9	NDUFS4	UQCRC1	SPATA18	TXNRD3			SLC25A52	NDUFC2
		FXN	NDUFS5	UQCRC2	COX4I1	LACTB			AIFM3	NDUFS1
		ETFBKMT	NDUFS6	UQCRFS1	COX5B	SLC25A25			DUSP18	NDUFS2
		PRDX5	NDUFS8	UQCRH	SLC9B2	CIDEA			GPAT2	NDUFS3
		TXN2	NDUFV2	UQCC3	NADK2	PTPMT1			CYB5A	NDUFV1
		MTHFD1L	NDUFV3	APOO	COX6A1	VASN			SLC25A48	NDUFS4
		NUDT13	OPA1	GRPEL1	COX6A2	OMA1			CYC1	NDUFS5
		PARS2	ATP5F1A	IMMP2L	COX6B1	SLC25A26			PRELID2	NDUFS6
		REXO2	OXA1L	CHCHD6	ATPSCKMT	MALSU1			CYP1A1	NDUFS8
		PTCD1	ATP5F1B	C15orf48	GRPEL2	CKMT1B			CYP2E1	NDUFV2
		POLDIP2	ATP5F1C	COX4I2	COX6C	CKMT2			TMEM65	NDUFV3
		MTG2	COQ6	ATP5MD	COX7A1	FAM210B			TDH	ATP5F1A
		GARS	FIS1	MCU	COX7A2	COX20			CYP11A1	ATP5F1B
		HIBCH	PAM16	TIMM29	COX7A2P2	ACSM1			CYP11B1	ATP5F1C
		ERAL1	NDUFA13	DMAC1	COX7B	TOP1MT			CYP11B2	MRPS16
		GCDH	NDUFAF1	SMDT1	COX7C	MRPL53			CYP24A1	MRPS18C
		BLOC1S1	COQ4	TIMM50	COX8A	MRPL54			CYP27A1	PAM16
		GCSH	COX16	COX5A	SDHAF4	AGAP2			CYP27B1	MRPL2
		MRPL46	ATP5F1D	ATP5MF	COX10	THEM4			DAO	MRPL4
		TRUB2	ATP5F1E	ATP5MPL	COX11	CHCHD1			DDX3X	NDUFA13
		ACAD8	ATP5PB		COX15	SFXN2			TIMM8A	MRPS7
		PPA2	ARMCX3		CPOX	PDZD8			COX7B2	NDUFAF1
		GLS2	ATP5MC1		CPS1	CLU			DHODH	MRPS2
		DIMT1	MPC1		CPT1A	CLIC1			CYB5R3	MRPL37
		GLDC	ATP5MC2		CPT1B	SFXN4			DMPK	MRPL51
		MCAT	ATP5MC3		CPT2	CLN3			DTYMK	MRPL30
		GLS	COQ3		NDUFAF6	LRRK2			PGAM5	MRPL27
		GLUD1	ATP5ME		ADHFE1	IFI27L1			HIGD2A	ATP5F1D
		AMT	ATP5PF		LETM2	MRPL52			IMMP1L	MRPL35
		GOT2	SLC25A3		CRAT	ISCA2			LDHD	MRPS17
		THEM5	ATP5PO		CREB1	SLC25A29			DHFR2	ATP5F1E
		RPUSD3	GDAP1		ATF2	MTFMT			PLD6	ATP5PB
		GPX1	NDUFB11		APOOL	CCR7			ENDOG	ATP5MC1
		MRPS28	TOMM7		FUNDC1	HYKK			SLC25A43	PDK1
		MRPS18B	CHCHD3		BRI3BP	ACSM2A			AK2	PDK2
		MRPL42	TMEM70		ROMO1	EARS2			EPHA4	MRPL48
		MRPL13	PPOX		PABPC5	MRPL10			MTLN	MRPS33
		MRPL18	MCUB		ACSM6	WDR81			ETFDH	ATP5MC2
		NR3C1	DMAC2		CS	SNHG29			ALAS2	ATP5MC3
		MRPL15	ANKZF1		SLC25A10	MIEF2			ABCD1	ATP5ME
		MRPL22	RHOT1		SLC25A52	FAM210A			ACSL1	ATP5PF
		DNAJC15	SYNJ2BP		AIFM3	COX6B2			ACSL3	ATP5PO
		SLC25A5	FOXRED1		DUSP18	MICOS13			ACSL4	MRPL39
		GRSF1	MFN1		GPAT2	CPT1C			MRPL21	POLG
		GSR	DNAJC11		CYB5A	NLRP5			SPATA19	POLRMT
		GSTZ1	COA1		PPM1K	NDUFA11			ABCB7	MRPS21
		PYCR2	AGK		SLC25A48	CNP			MICU2	MRPL50
		DMGDH	CISD1		CYC1	CNR1			FDXR	NDUFB11
		MRM2	NDUFA12		PRELID2	ADH5			FECH	TOMM7
		HSD17B10	NDUFA4L2		CYP1A1	NAXE			FGR	CHCHD3
		HAGH	MFF		CYP2E1	MRPL55			MLXIP	TRMT10C
		HADHA	WDR93		TMEM65	CMPK2			TRAK1	MRPL16
		HADHB	TOMM22		TDH	MTERF4			FOXO3	MCUB
		HADH	COQ8A		CYP11A1	DNAJC19			SARM1	MRPL20
		HMGCL	BAK1		CYP11B1	CHCHD4			MRPS27	DMAC2
		HMGCS2	SLC25A19		CYP11B2	TAMM41			SPART	ANKZF1
		NUDT2	BCS1L		CYP24A1	GLYCTK			GRAMD4	MRPS18A
		MMAB	BDH1		CYP27A1	SPATA18			LPIN1	MRPS10
		ACADL	SCO1		CYP27B1	COX4I1			PMPCA	FOXRED1
		HSPA9	BID		ALDH1L2	COX5B			ACSL6	MFN1
		HSPD1	SDHA		DAO	SLC9B2			SIRT5	DNAJC11
		HSPE1	SDHB		NAGS	PPARGC1B			SIRT4	AGK
		MRPL58	DUSP21		DBT	NADK2			SLC44A1	NDUFA12
		NAT8L	SDHC		ECI1	COX6A1			ABCB10	NDUFA4L2
		ACADM	SDHD		DDX3X	COX6A2			GCAT	MCCC1
		ACSM4	MCUR1		DECR1	COX6B1			NNT	MRPS22
		IDH2	STMP1		MMAA	ATPSCKMT			FPGS	WDR93
		IDH3A	PINK1		TIMM8A	GRPEL2			ARL2BP	TOMM22
		IDH3B	FUNDC2		COX7B2	COX6C			PPP1R15A	MRPL47
		IDH3G	SNCA		DGUOK	COX7A1			PISD	BAX
		ACSM2B	BNIP3		DHODH	COX7A2			FKBP8	BCKDHA
		NMNAT3	SOX10		CYB5R3	COX7A2P2			BCL2L13	BCKDHB
		ACADS	SPG7		DLAT	COX7B			MTCH1	MRPS35
		ACADSB	STAR		DLD	COX7C			MTCH2	MRPL23
		ACADVL	SURF1		DLST	COX8A			AFG1L	BCS1L
		IVD	UQCRB		SARDH	SDHAF4			MTOR	MRPL12
		GSTK1	UQCRC1		DMPK	COX10			SLC25A30	MRPS12
		KARS	UQCRC2		DNA2	COX11			IFI6	MRPL17
		NDUFS7	UQCRFS1		ABAT	COX15			RNF144B	SDHA
		ACAT1	UQCRH		DTYMK	CPOX			SAMM50	NSUN3
		ARG2	UQCC3		AGXT	CPS1			MPC2	SDHB
		NSUN4	NDUFAF5		ECHS1	CPT1A			LETMD1	SDHC
		LIPT2	APOO		PGAM5	CPT1B			NDUFAF3	SDHD
		ARL2	MUL1		HIGD2A	CPT2			HIGD1A	MRPS14
		MDH2	COQ8B		IMMP1L	NDUFAF6			REXO2	MCCC2
		ME2	L2HGDH		LDHD	TMEM71			RAB11FIP5	MRPL14
		MIPEP	SLC8B1		ACSF3	ADHFE1			MTG2	MRPS26
		ATXN3	GRPEL1		IBA57	LETM2			FBXL4	MRPS24
		ALDH6A1	TMEM177		DHFR2	NACC2			GATM	MRPS15
		MPG	IMMP2L		PLD6	CRAT			ERAL1	MRPS11
		MPST	TOMM40L		PDE12	CREB1			NIPSNAP2	MRPS9
		MTHFD2L	NOA1		PRIMPOL	ATF2			BLOC1S1	MRPS6
		AKR1B15	COQ5		ENDOG	APOOL			TIMM10B	MRPS5
		NUDT1	CHCHD6		SLC25A43	FUNDC1			TIMM13	MRPL41
		MMUT	C15orf48		AK2	ASB9			TIMM10	MRPL40
		NDUFA7	COX4I2		EPHA4	CRY1			TIMM9	MRPL38
		NDUFA9	MGARP		AK4	BRI3BP			TIMM8B	MRPL36
		NDUFA10	ATP5MD		MTLN	ROMO1			MRPL46	MRPL34
		NDUFAB1	TMEM11		ERBB4	PABPC5			ATP5MGL	MRPL32
		NDUFB8	RHOT2		ETFA	CRYAB			GFER	MRPL11
		NDUFS1	MCU		ETFB	PARP1			GHITM	MRPL9
		NDUFS2	TIMM29		ALAS1	CRYM			UQCRQ	PINK1
		NDUFS3	DMAC1		ETFDH	ACSM6			GK	MRPL44
		NDUFS8	ATP23		ALAS2	TRUB1			DMAC2L	MRPS34
		NME4	COX7A2L		ABCD1	CS			GK2	SNCA
		OAT	SMDT1		ALDH2	MAPK14			PRELID1	SPG7
		OGDH	TIMM50		ACSL1	ETFRF1			COQ2	SUPV3L1
		ATP5F1A	COX5A		ACSL3	SLC25A10			HTRA2	UQCRB
		ACO2	SFXN1		ACSL4	SLC25A52			GOT2	UQCRC1
		OTC	ATP5MF		ALDH1B1	TICAM1			GPD2	UQCRC2
		ALDH7A1	ATP5MPL		MRPL21	CREB3L4			SLC25A45	UQCRFS1
		OXA1L	TOMM20		SPATA19	AIFM3			SLC25A47	UQCRH
		OXCT1	TOMM70		ABCB7	HSCB			SLC25A41	MRPL49
		ATP5F1B	MFN2		MICU2	DUSP18			SLC25A42	VDAC1
		AK3	SCO2		FDX1	GPAT2			SLC25A34	DAP3
		ATP5F1C			FDXR	CMC1			GPER1	MRPL57
		PC			FECH	CYB5A			COX18	UQCC3
		PCCA			FGR	PPM1K			MICU3	APOO
		PCCB			FH	SLC25A48			MRPS28	MRPL24
		MRPS16			FASTKD2	CYC1			COA3	GRPEL1
		GLRX2			MLXIP	PRELID2			MRPS18B	IMMP2L
		MRPS18C			TRAK1	CYP1A1			ACAD9	TOMM40L
		PAM16			DHX30	CYP1B1			MRPL42	CHCHD6
		PCK2			FOXO3	FMC1			TMEM14A	MRPL45
		YARS2			SARM1	GIMAP8			FLVCR1	C15orf48
		MRPL2			MRPS27	CYP2D7			MRPL13	MRPL43
		MRPL4			SPART	CYP2D6			MRPL18	COX4I2
		MRPS7			GRAMD4	CYP2E1			NDUFAF4	MPV17L2
		TRNT1			LPIN1	TMEM65			MRPL15	ATP5MD
		MECR			PMPCA	TDH			TIMM21	PNPT1
		TFB1M			ACSL6	CYP11A1			MRPL22	SUCLG2
		LACTB2			LARS2	CYP11B1			SLC25A4	MCU
		MRPS2			SIRT5	CYP11B2			DNAJC15	TIMM29
		AADAT			SIRT4	CYP24A1			SLC25A5	DMAC1
		ACP6			SIRT3	CYP27A1			SLC25A6	C12orf65
		GLRX5			MLYCD	CYP27B1			UQCR10	SMDT1
		MRPL37			TDRD7	ALDH1L2			UBIAD1	MTG1
		MRPL51			HARS2	PPTC7			TIMM22	MRPS36
		MRPL30			SLC44A1	DAO			SLC25A24	TIMM50
		MRPL27			ABCB10	NAGS			ANXA1	COX5A
		ATP5F1D			GCAT	DBT			HADHA	PMPCB
		MRPL35			ETHE1	ECI1			HADHB	ATP5MF
		MRPS17			ISCU	DDX1			HCCS	MRPL33
		PDE2A			NNT	DDX3X			STOML2	ATP5MPL
		ATP5F1E			FPGS	DDX6			HK1	KIAA0391
		ATP5PB			ARL2BP	SPATA5			HK2	MRPL19
		PDHA1			PDSS1	DECR1			ACACB	TOMM20
		LIPT1			ACOT9	MMAA			HSD3B1	TOMM70
		PDHA2			PPP1R15A	TIMM8A			HSD3B2
		PDHB			PISD	DHX36			ACADL
		PDK1			FKBP8	COX7B2			HSPD1
		PDK2			BCL2L13	CLYBL			MRPL58
		MRPL48			MTCH1	DGUOK			NAT8L
		PDK3			MTCH2	DHFR			ACADM
		MRPS33			FXN	DHODH			TMEM173
		STYXL1			AFG1L	CYB5R3			COX8C
		PDK4			MTOR	DLAT			IFI27
		COQ3			SLC25A30	DLD			MTX3
		PIN4			IFI6	DLST			MPC1L
		NUDT9			ETFBKMT	SARDH			ACADVL
		MRPL39			RNF144B	DMPK			NDUFS7
		POLG			SAMM50	DNA2			MIGA1
		POLRMT			PRDX5	ABAT			PNPLA7
		MRPS21			TXN2	DTYMK			SLC27A1
		MTRF1L			MPC2	DUT			ARG1
		MRPL50			LETMD1	E2F1			TOMM20L
		PDP1			MTHFD1L	AGXT			COA6
		TRIT1			NDUFAF3	ECH1			SMIM20
		AUH			NUDT13	ECHS1			LETM1
		TRMT10C			PARS2	PGAM5			LGALS3
		ADPRHL2			HIGD1A	HIGD2A			SLC25A35
		SARS2			REXO2	IMMP1L			CHCHD10
		MRPL16			PTCD1	LDHD			TOMM5
		SDHAF2			RAB11FIP5	ACSF3			SLC25A53
		ACSM5			POLDIP2	ELK1			ARL2
		TRMT61B			MTG2	IBA57			LYN
		MRPL20			GARS	ELK3			MAOA
		PDPR			FBXL4	DHFR2			MAOB
		DARS2			HIBCH	MARK2			MCL1
		MRPS18A			GATM	PLD6			SMCP
		MRPS10			ERAL1	PDE12			MGST1
		MRM3			NIPSNAP2	PRIMPOL			ATXN3
		ATAD3A			GCDH	ENDOG			ATP5F1EP2
		TMLHE			BLOC1S1	NAIF1			MPV17
		ABHD10			TIMM10B	SLC25A43			UQCRHL
		LRRC59			TIMM13	AK2			MICOS10
		NDUFAF7			TIMM10	STOM			MTHFD2L
		DHTKD1			TIMM9	EPHA4			ASS1
		IARS2			TIMM8B	AK4			MT3
		NAXD			GCSH	MTLN			MT-ATP6
		OGDHL			MRPL46	ERBB4			MT-ATP8
		DDX28			ATP5MGL	AKT1			MT-CO1
		ACSS2			GFER	ERN1			MT-CO2
		PRODH			TRUB2	ESR2			MT-CO3
		TWNK			ACAD8	ETFA			MT-CYB
		MCCC1			PPA2	ETFB			MT-ND1
		MRPS22			GHITM	ALAS1			MT-ND2
		NT5M			UQCRQ	ETFDH			MT-ND3
		SDHAF3			GK	ALAS2			MT-ND4
		RARS2			DMAC2L	EYA2			MT-ND4L
		PDSS2			GK2	ABCD1			MT-ND5
		LYRM4			GLS2	ALDH2			MT-ND6
		MRPL47			PRELID1	ACSL1			MTX1
		PDP2			COQ2	ACSL3			MX1
		TRMT5			DIMT1	ACSL4			MX2
		CCAR2			GLDC	FANCG			MYOC
		PYCR1			MCAT	ALDH1B1			NDUFA1
		QARS			HTRA2	ATAD3C			NDUFA2
		BCAT2			GLS	MTIF3			NDUFA3
		RAD51			GLUD1	MRPL21			NDUFA4
		BCKDHA			AMT	SPATA19			NDUFA5
		BCKDHB			GOT2	GLYATL2			NDUFA6
		BCL2L1			GPD2	ABCB7			NDUFA7
		RNASEL			SLC25A45	ALKBH3			NDUFA8
		MRPS35			SLC25A47	MICU2			NDUFA9
		FASTKD5			SLC25A41	FDX1			NDUFA10
		ELAC2			SLC25A42	FDXR			NDUFAB1
		GUF1			THEM5	FECH			NDUFB1
		ABCE1			SLC25A34	FEN1			NDUFB2
		MRPL23			GPER1	FGR			NDUFB3
		MRPL12			RPUSD3	FH			NDUFB4
		MRPS12			COX18	FHIT			NDUFB5
		RPS3			MICU3	PPM1E			NDUFB6
		BDH1			GPX1	FASTKD2			NDUFB7
		ACSM3			MRPS28	MLXIP			NDUFB8
		MRPL17			COA3	FKBP4			NDUFB9
		NSUN3			MRPS18B	TRAK1			NDUFB10
		DUSP21			ACAD9	DHX30			NDUFC1
		MRPS14			MRPL42	MSRB2			NDUFC2
		TP53AIP1			TMEM14A	SIRT2			NDUFS1
		OXCT2			FLVCR1	VWA8			NDUFS2
		MCCC2			MRPL13	FOXO1			NDUFS3
		TFB2M			MRPL18	FOXO3			NDUFV1
		SDHAF1			NDUFAF4	KIF1B			NDUFS4
		SHC1			NR3C1	SARM1			NDUFS5
		SHMT2			MRPL15	MRPS27			NDUFS6
		ETNPPL			TIMM21	SPART			NDUFS8
		AGXT2			MRPL22	GRAMD4			NDUFV2
		MRPL14			SLC25A4	LPIN1			NDUFV3
		MRPS26			DNAJC15	PMPCA			NME1
		MRPS24			SLC25A5	SYNE2			NME2
		MRPS15			GRSF1	PACS2			NME4
		MRPS11			SLC25A6	AGTPBP1			SLC11A2
		MRPS9			GSR	ACSL6			NRGN
		MRPS6			GSTZ1	PPP1R13B			CISD2
		MRPS5			UQCR10	NCSTN			OGDH
		MRPL41			UBIAD1	LARS2			OPA1
		MRPL40			PYCR2	SIRT5			ATP5F1A
		MRPL38			TIMM22	SIRT4			OTC
		MRPL36			SLC25A24	SIRT3			OXA1L
		MRPL34			DMGDH	SIRT1			PEBP1
		MRPL32			MRM2	MLYCD			ATP5F1B
		MRPL11			ANXA1	TDRD7			ATP5F1C
		MRPL9			HSD17B10	HARS2			MTERF3
		MRPL44			HAGH	SLC44A1			COQ6
		MRPS34			HADHA	ABCB10			PRELID3B
		SNCA			HADHB	GCAT			MRPS16
		SOD1			HADH	ETHE1			MRPS18C
		SOD2			HCCS	ISCU			FIS1
		SSBP1			STOML2	NNT			PAM16
		SUOX			HK1	FPGS			MRPL2
		SUPV3L1			HK2	DDAH2			MRPL4
		BTD			HMGCL	ARL2BP			NDUFA13
		TERT			HMGCS2	CASP14			MRPS7
		TFAM			NUDT2	PDSS1			SH3GLB1
		C1QBP			ACACB	HEBP2			NDUFAF1
		TK2			MMAB	ACOT9			MRPS2
		TOP3A			HSD3B1	AMACR			COQ4
		TP53			HSD3B2	PPP1R15A			CHCHD2
		TST			ACADL	RAB38			COX16
		D2HGDH			HSPA9	GABARAPL1			MRPL37
		TUFM			HSPD1	PISD			MRPL51
		TYMS			HSPE1	MAFF			MRPL30
		UQCRC2			MRPL58	FKBP8			MRPL27
		MRPL49			NAT8L	BCL2L13			COA4
		VDAC1			ACADM	MTCH1			ECSIT
		VDAC2			TMEM173	MTCH2			ATP5F1D
		CA5A			ACSM4	FXN			TIMMDC1
		DAP3			IDH2	AFG1L			ARMCX1
		MRPL57			IDH3A	MTOR			SLC25A37
		ALDH5A1			COX8C	ABL1			MRPL35
		HSD17B8			IDH3B	FYN			NGRN
		MAIP1			IDH3G	SLC25A30			MRPS17
		CHPF			IFI27	IFI6			PDE2A
		CARS2			MTX3	MSRB3			ATP5F1E
		MRPL24			MPC1L	ETFBKMT			TRIAP1
		ACSS3			ACSM2B	METAP1D			ATP5PB
		NARS2			NMNAT3	MPV17L			TMEM14C
		TEFM			ACADS	RNF144B			MTFP1
		MTERF1			ACADSB	GK5			ARMCX3
		MRM1			ACADVL	BCLAF3			ATP5MC1
		DGLUCY			IVD	C10orf67			SLC25A39
		ACSF2			GSTK1	FBXO7			MRPL48
		TARS2			KARS	SAMM50			MRPS23
		NUBPL			NDUFS7	MTO1			MRPS33
		GRPEL1			MIGA1	PRDX5			MPC1
		MTERF2			PNPLA7	TXN2			ATP5MC2
		FLAD1			SLC27A1	MPC2			ACSL5
		PUS1			ACAT1	LETMD1			ATP5MC3
		COASY			ARG1	TMEM186			COQ3
		PDHX			ARG2	MTHFD1L			ATP5ME
		ACAD10			NSUN4	NDUFAF3			ATP5PF
		ISCA1			LIPT2	CLIC4			PGR
		FAHD1			TOMM20L	NIPSNAP3A			PHB
		CLPP			COA6	PNKD			SLC25A3
		BCO2			SMIM20	KANK2			PI4KB
		ALKBH7			LETM1	NUDT13			PLA2G4A
		COQ5			LGALS3	PARS2			PLN
		UQCC2			SLC25A35	NGDN			PMAIP1
		MRPL45			CHCHD10	HIGD1A			ATP5PO
		GFM2			TOMM5	REXO2			2020-09-04
		CASQ1			SLC25A53	PTCD1			MRPL39
		ACSS1			ARL2	RAB11FIP5			CYCS
		MRPL43			LYN	POLDIP2			GDAP1
		MCEE			MAOA	KIF1BP			MRPS21
		GPT2			MAOB	MTG2			ARMCX6
		MPV17L2			MCL1	GARS			MIEF1
		CBR4			SMCP	STAP1			MRPL50
		RPUSD4			MDH2	FBXL4			NDUFB11
		ATG4D			ME2	HIBCH			TOMM7
		PHYKPL			MGST1	SACS			CRLS1
		PARG			MIPEP	GATM			2020-03-05
		GFM1			ATXN3	ERAL1			VPS13C
		ALDH4A1			ATP5F1EP2	MYCBP			CKMT1A
		SUCLG2			ALDH6A1	NIPSNAP2			TTC19
		SUCLG1			MPG	FAM162A			CHCHD3
		SUCLA2			MPST	GCDH			MRPL16
		CCNB1			MPV17	GCK			TMEM70
		GADD45GIP1			UQCRHL	GCKR			SLC25A38
		NFS1			MICOS10	BLOC1S1			PPOX
		LYRM7			MTHFD2L	TIMM10B			2020-03-02
		DNAJA3			AKR1B15	TIMM13			AURKAIP1
		C12orf65			ASS1	TIMM10			PPP1CC
		SMDT1			MT3	TIMM9			MCUB
		MTG1			MT-ATP6	TIMM8B			PTCD3
		MRPS36			MT-ATP8	GCSH			MRPL20
		TBRG4			MT-CO1	MRPL46			DMAC2
		MRRF			MT-CO2	DAOA			ANKZF1
		LDHAL6B			MT-CO3	ATP5MGL			MSTO1
		ATXN3L			MT-CYB	GFER			MRPS18A
		MARS2			NUDT1	GJA1			MRPS10
		LONP1			MT-ND1	TRUB2			RMDN3
		FTMT			MT-ND2	ACAD8			SLC25A36
		PMPCB			MT-ND3	PPA2			PPP2R2B
		MRPL33			MT-ND4	GHITM			ATAD3A
		KIAA0391			MT-ND4L	UQCRQ			UQCC1
		MRPL19			MT-ND5	GK			RHOT1
		CDK1			MT-ND6	DMAC2L			AGPAT5
		SCO2			MTX1	BBC3			SYNJ2BP
					MMUT	GK2			GIMAP5
					MX1	GLS2			CHDH
					MX2	PRELID1			PARL
					MYOC	DISC1			FOXRED1
					NDUFA1	COQ2			AMBRA1
					NDUFA2	NFU1			MFN1
					NDUFA3	MMADHC			DNAJC11
					NDUFA4	DIMT1			COA1
					NDUFA5	APEX2			AGK
					NDUFA6	GLDC			PRKCA
					NDUFA7	RPS6KA6			ADAP2
					NDUFA8	MCAT			CISD1
					NDUFA9	HTRA2			TMEM126B
					NDUFA10	GLS			NDUFA12
					NDUFAB1	HDHD5			SLC25A40
					NDUFB1	GLUD1			PRODH
					NDUFB2	GLUD2			DIABLO
					NDUFB3	AMT			PSEN1
					NDUFB4	GLUL			AGPAT4
					NDUFB5	GNRH1			NDUFA4L2
					NDUFB6	GOT2			STARD7
					NDUFB7	SFN			MRPS22
					NDUFB8	GPD2			MFF
					NDUFB9	RAB40AL			WDR93
					NDUFB10	BLOC1S2			TOMM22
					NDUFC1	SLC25A45			COQ8A
					NDUFC2	GATC			SDHAF3
					NDUFS1	SIAH3			COQ9
					NDUFS2	SLC25A47			CIAPIN1
					NDUFS3	CISD3			PLSCR3
					NDUFV1	TMEM102			TIGAR
					NDUFS4	CAVIN1			MRPL47
					NDUFS5	NDUFAF8			BAD
					NDUFS6	SLC25A41			MRS2
					NDUFS8	SLC25A42			NLN
					NDUFV2	THEM5			MAVS
					NDUFV3	SLC25A34			GPAM
					NME1	GPER1			BAK1
					NME2	TCAIM			BAX
					NME4	RPUSD3			ALDH18A1
					SLC11A2	DOK7			SQOR
					NRGN	COX18			PRODH2
					CISD2	MICU3			RAF1
					OAT	ANK2			BCL2
					OGDH	GPS2			BCL2A1
					OPA1	GPX1			BCL2L1
					ATP5F1A	GPX4			BCL2L2
					ACO2	MRPS28			SLC25A19
					OTC	COA3			RNF5
					ALDH7A1	DCPS			MRPS35
					OXA1L	MRPS18B			CCDC90B
					OXCT1	ACAD9			GUF1
					PEBP1	MRPL42			MRPL23
					ATP5F1B	TMEM14A			BCS1L
					AK3	FLVCR1			MRPL12
					ATP5F1C	MRPL13			MRPS12
					PC	MRPL18			RPS3
					PCCA	NDUFAF4			RPS6KB1
					PCCB	NR3C1			BDH1
					MTERF3	GTPBP8			RPS27A
					COQ6	MRPL15			SCO1
					PRELID3B	TIMM21			BID
					MRPS16	MRPL22			BIK
					GLRX2	SLC25A4			MRPL17
					MRPS18C	DNAJC15			SDHA
					FIS1	PYCARD			SDHB
					PAM16	SLC25A5			DUSP21
					PCK2	GRSF1			SDHC
					YARS2	SLC25A6			SDHD
					MRPL2	GSK3A			MRPS14
					MRPL4	GSK3B			MCUR1
					NDUFA13	GSR			GOLPH3
					MRPS7	GSTP1			MOAP1
					TRNT1	GSTZ1			MRPS25
					SH3GLB1	UQCR10			STMP1
					MECR	ZDHHC8			SHMT2
					NDUFAF1	TFCP2L1			2020-03-01
					TFB1M	UBIAD1			MRPL14
					LACTB2	PYCR2			MRPS26
					MRPS2	TIMM22			MRPS24
					COQ4	SLC25A24			MRPS15
					CHCHD2	DMGDH			MRPS11
					AADAT	MRM2			MRPS9
					ACP6	GZMB			MRPS6
					GLRX5	ANXA1			MRPS5
					COX16	HSD17B10			MRPL41
					MRPL37	HAGH			MRPL40
					MRPL51	HADHA			MRPL38
					MRPL30	HADHB			MRPL36
					MRPL27	HADH			MRPL34
					COA4	HARS			MRPL32
					ECSIT	HCCS			MRPL11
					ATP5F1D	HCLS1			MRPL9
					TIMMDC1	ANXA6			MRPL1
					ARMCX1	HIVEP1			PINK1
					SLC25A37	STOML2			REEP1
					MRPL35	HK1			MRPL44
					NGRN	HK2			TMEM135
					MRPS17	HLCS			COA7
					PDE2A	HMGCL			SLC8A3
					ATP5F1E	HMGCS2			SLC25A1
					TRIAP1	NUDT2			FUNDC2
					ATP5PB	ACACB			MRPS34
					TMEM14C	HOXB9			BNIP1
					MTFP1	MMAB			SNCA
					ARMCX3	APEX1			BNIP3
					ATP5MC1	HSD3B1			SOD1
					PDHA1	HSD3B2			BNIP3L
					LIPT1	ACADL			SORD
					PDHA2	DNAJA1			BOK
					PDHB	HSPA1A			SOX10
					SLC25A39	HSPA1B			SPG7
					PDK1	HSPA5			BPHL
					PDK2	HSPA9			SRC
					MRPL48	HSP90AB1			STAR
					MRPS23	HSPD1			STAT3
					PDK3	HSPE1			SUOX
					MRPS33	BRINP3			SURF1
					STYXL1	MRPL58			VAMP1
					PDK4	NAT8L			TAZ
					MPC1	ACADM			TMBIM6
					ATP5MC2	TMEM173			TSPO
					ACSL5	CA5BP1			AC006538.1
					ATP5MC3	ACSM4			TYMS
					COQ3	IDE			DNM1P34
					ATP5ME	IDH1			UBA52
					ATP5PF	IDH2			UBB
					PGR	IDH3A			UBC
					PHB	COX8C			UCP1
					SLC25A3	IDH3B			UCP2
					PI4KB	IDH3G			UCP3
					PIN4	IFI27			UQCRB
					PLA2G4A	IFIT3			UQCRC1
					NUDT9	IRGM			UQCRC2
					PLN	MTX3			UQCRFS1
					PMAIP1	MACC1			UQCRH
					ATP5PO	MPC1L			MRPL49
					2020-09-04	ACSM2B			VDAC1
					MRPL39	NMNAT3			VDAC2
					CYCS	ACADS			VDAC3
					POLG	ANKRD37			VRK2
					GDAP1	ACADSB			DAP3
					POLRMT	ILF3			SLC25A20
					MRPS21	IREB2			MRPL57
					ARMCX6	ARAF			SLC25A23
					MIEF1	ACADVL			UQCC3
					MTRF1L	IVD			NDUFAF5
					MRPL50	JARID2			APOO
					NDUFB11	GSTK1			CHCHD7
					TOMM7	KARS			HSD17B8
					CRLS1	NDUFS7			MAIP1
					PDP1	YJEFN3			MRPL24
					2020-03-05	MIGA1			MUL1
					TRIT1	ERCC6L2			NLRX1
					VPS13C	PNPLA7			QTRT2
					CKMT1A	LRRC10			SLC25A22
					AUH	KCNJ8			COQ8B
					TTC19	SLC27A1			L2HGDH
					CHCHD3	KCNJ11			SLC8B1
					TRMT10C	ACAT1			PANK2
					ADPRHL2	ARG1			CALM1
					SARS2	ARG2			MYO19
					MRPL16	KRAS			COQ10B
					SDHAF2	NSUN4			GRPEL1
					TMEM70	ARMS2			EFHD1
					SLC25A38	LIPT2			SLC25A16
					PPOX	TOMM20L			COASY
					ACSM5	COA6			TMEM177
					2020-03-02	BOLA3			CYB5B
					AURKAIP1	SMIM20			CALM3
					TRMT61B	GLYATL3			SLC25A32
					PPP1CC	ACAT2			RCC1L
					MCUB	LETM1			AKAP1
					PTCD3	LGALS3			SFXN3
					MRPL20	LIG1			QTRT1
					PDPR	LIG3			SLC25A28
					DMAC2	FADS1			CAPN2
					ANKZF1	SLC25A35			SNN
					MSTO1	CHCHD10			FZD9
					DARS2	MCCD1			SLC25A31
					MRPS18A	TOMM5			C19orf12
					MRPS10	SLC25A53			SLC25A18
					RMDN3	ARL2			ATAD3B
					MRM3	LYN			SLC25A2
					SLC25A36	MIR17			IMMP2L
					PPP2R2B	MIR29A			IFI27L2
					ATAD3A	MIR29B1			SPNS1
					TMLHE	MIR29B2			SLC25A11
					UQCC1	MIR29C			PLEKHN1
					RHOT1	NBR1			ULK1
					AGPAT5	MXD1			CASP8
					SYNJ2BP	ARSB			ACAD11
					GIMAP5	MAOA			TOMM40L
					ABHD10	MAOB			TMEM126A
					CHDH	MAPT			CHCHD5
					LRRC59	BLID			CARD19
					NDUFAF7	MCL1			NOA1
					PARL	SMCP			COQ5
					DHTKD1	MDH2			SLC25A33
					FOXRED1	ME1			DNAJC30
					AMBRA1	ME2			UQCC2
					MFN1	MECP2			CHCHD6
					IARS2	MGST1			MRPL45
					DNAJC11	MIPEP			C15orf48
					NAXD	ATXN3			GNPAT
					COA1	MMP2			MRPL43
					AGK	ATP5F1EP2			CAT
					OGDHL	ALDH6A1			COX4I2
					PRKCA	MOBP			MGARP
					DDX28	MPG			OGT
					ADAP2	MPST			USP30
					CISD1	MPV17			MPV17L2
					TMEM126B	PLIN5			RTN4IP1
					ACSS2	UQCRHL			ATP5MD
					NDUFA12	MICOS10			AIFM2
					SLC25A40	MTHFD2L			MIGA2
					PRODH	AKR1B15			CEP89
					DIABLO	ASS1			COX14
					PSEN1	MSRA			ATCAY
					TWNK	MT3			CABS1
					AGPAT4	MT-ATP6			KMO
					NDUFA4L2	MT-ATP8			SLC25A12
					STARD7	MT-CO1			BECN1
					MCCC1	MT-CO2			PNPT1
					MRPS22	MT-CO3			CDS2
					MFF	MT-CYB			TMEM11
					NT5M	NUDT1			WASF1
					WDR93	MTHFD1			SLC25A21
					TOMM22	MTIF2			FATE1
					COQ8A	MT-ND1			RHOT2
					SDHAF3	MT-ND2			SLC25A14
					COQ9	MT-ND3			BMF
					CIAPIN1	MT-ND4			MCU
					RARS2	MT-ND4L			TIMM29
					PLSCR3	MT-ND5			LYRM7
					TIGAR	MT-ND6			STARD13
					PDSS2	MTX1			COX19
					LYRM4	MMUT			DMAC1
					MRPL47	MUTYH			SLC25A46
					BAD	MX1			AIFM1
					MRS2	MX2			ATP23
					NLN	MYOC			RNF185
					MAVS	NCBP1			RSAD2
					PDP2	NDUFA1			COX7A2L
					TRMT5	NDUFA2			SMDT1
					GPAM	NDUFA3			NDUFAF2
					BAK1	NDUFA4			SLC25A51
					CCAR2	NDUFA5			MTG1
					BAX	NDUFA6			MRPS36
					PYCR1	NDUFA7			ATXN3L
					ALDH18A1	NDUFA8			TIMM50
					SQOR	NDUFA9			COQ10A
					PRODH2	NDUFA10			COX5A
					QARS	NDUFAB1			SFXN1
					BCAT2	NDUFB1			SFXN5
					RAD51	NDUFB2			ABCG2
					RAF1	NDUFB3			MAPK8IP1
					BCKDHA	NDUFB4			SLC25A27
					BCKDHB	NDUFB5			PGS1
					BCL2	NDUFB6			PMPCB
					BCL2A1	NDUFB7			ATP5MF
					BCL2L1	NDUFB8			MRPL33
					BCL2L2	NDUFB9			ATP5MPL
					SLC25A19	NDUFB10			IKBKE
					RNASEL	NDUFC1			SLC25A44
					RNF5	NDUFC2			SNPH
					MRPS35	NDUFS1			MRPL19
					CCDC90B	NDUFS2			TOMM20
					FASTKD5	NDUFS3			ARMCX2
					ELAC2	NDUFV1			TRIM14
					GUF1	NDUFS4			TOMM70
					ABCE1	NDUFS5			MFN2
					MRPL23	NDUFS6			EXOG
					BCS1L	NDUFS8			SCO2
					MRPL12	NDUFV2
					MRPS12	NDUFV3
					RPS3	NFKB1
					RPS6KB1	ACO1
					BDH1	NIT1
					RPS27A	NKTR
					ACSM3	NME1
					SCO1	NME2
					BID	NME4
					BIK	NMT1
					MRPL17	NOS1
					SDHA	ATP2A1
					NSUN3	SLC11A2
					SDHB	NRDC
					DUSP21	NRGN
					SDHC	NTHL1
					SDHD	NTSR1
					MRPS14	COA5
					MCUR1	AC004551.1
					TP53AIP1	CISD2
					OXCT2	OAT
					GOLPH3	OGDH
					MCCC2	OGG1
					MOAP1	OPA1
					TFB2M	ATP5F1A
					SDHAF1	ACO2
					MRPS25	OTC
					SHC1	ALDH7A1
					STMP1	OXA1L
					SHMT2	OXCT1
					2020-03-01	P2RY1
					ETNPPL	P4HA1
					AGXT2	PEBP1
					MRPL14	RRM2B
					MRPS26	G0S2
					MRPS24	NOX4
					MRPS15	ATP5F1B
					MRPS11	PRKN
					MRPS9	DCAF8
					MRPS6	AK3
					MRPS5	ATP5F1C
					MRPL41	PC
					MRPL40	PCCA
					MRPL38	PCCB
					MRPL36	MTERF3
					MRPL34	COQ6
					MRPL32	PRELID3B
					MRPL11	MRPS16
					MRPL9	GLRX2
					MRPL1	MRPS18C
					PINK1	FIS1
					REEP1	PAM16
					MRPL44	BOLA1
					TMEM135	GLOD4
					COA7	PCK1
					SLC8A3	PCK2
					SLC25A1	YARS2
					FUNDC2	MRPL2
					MRPS34	MRPL4
					BNIP1	NDUFA13
					SNCA	MRPS7
					BNIP3	TRNT1
					SOD1	SCCPDH
					SOD2	SH3GLB1
					BNIP3L	MECR
					SORD	NDUFAF1
					BOK	TFB1M
					SOX10	APH1A
					SPG7	LACTB2
					BPHL	MRPS2
					SRC	COQ4
					SSBP1	CHCHD2
					STAR	AADAT
					STAT3	TACO1
					SUOX	ACP6
					SUPV3L1	GLRX5
					SURF1	COX16
					VAMP1	C6orf203
					BTD	MRPL37
					TAZ	MRPL51
					TMBIM6	MRPL30
					TERT	MRPL27
					TFAM	CEND1
					TSPO	COA4
					AC006538.1	ECSIT
					C1QBP	ATP5F1D
					TK2	TIMMDC1
					TOP3A	ARMCX1
					TP53	SLC25A37
					TST	MRPL35
					D2HGDH	NGRN
					TUFM	MRPS17
					TYMS	UCHL5
					DNM1P34	PDE2A
					UBA52	ATP5F1E
					UBB	NOL7
					UBC	HEMK1
					UCP1	HACD3
					UCP2	TRIAP1
					UCP3	ATP5PB
					UQCRB	CWC15
					UQCRC1	TMEM14C
					UQCRC2	MTFP1
					UQCRFS1	ARMCX3
					UQCRH	PCF11
					MRPL49	ATP5MC1
					VDAC1	PDHA1
					VDAC2	LIPT1
					VDAC3	PDHA2
					VRK2	PDHB
					CA5A	SLC25A39
					DAP3	PDK1
					SLC25A20	PDK2
					MRPL57	MRPL48
					SLC25A23	MRPS23
					UQCC3	PDK3
					NDUFAF5	MRPS33
					APOO	PTRH2
					CHCHD7	CDK5RAP1
					ALDH5A1	STYXL1
					HSD17B8	PDK4
					MAIP1	MPC1
					CHPF	ATP5MC2
					CARS2	ACSL5
					MRPL24	CYB5R1
					MUL1	WWOX
					ACSS3	TMEM8B
					NLRX1	ATP5MC3
					QTRT2	COQ3
					NARS2	GATB
					TEFM	PFDN2
					SLC25A22	PFDN4
					MTERF1	ATP5ME
					MRM1	ATP5PF
					COQ8B	PGR
					L2HGDH	PHB
					DGLUCY	SLC25A3
					SLC8B1	PHYH
					PANK2	PI4KB
					CALM1	PIN1
					MYO19	PIN4
					COQ10B	PKM
					ACSF2	PLA2G4A
					TARS2	NUDT9
					NUBPL	PLN
					GRPEL1	PMAIP1
					MTERF2	ATP5PO
					EFHD1	ATP7B
					FLAD1	2020-09-04
					PUS1	MRPL39
					SLC25A16	CYCS
					COASY	POLG
					PDHX	GDAP1
					ACAD10	POLRMT
					TMEM177	PON2
					CYB5B	MRPS21
					CALM3	POR
					SLC25A32	ARMCX6
					RCC1L	MIEF1
					AKAP1	MTRF1L
					ISCA1	MRPL50
					SFXN3	NDUFB11
					FAHD1	DDIT4
					QTRT1	TOMM7
					SLC25A28	POU5F1
					CLPP	NDFIP2
					CAPN2	POU5F1B
					SNN	CRLS1
					FZD9	PDP1
					SLC25A31	2020-03-05
					C19orf12	XAF1
					SLC25A18	TRIT1
					ATAD3B	VPS13C
					BCO2	CKMT1A
					SLC25A2	AUH
					IMMP2L	TTC19
					IFI27L2	CHCHD3
					SPNS1	PPL
					SLC25A11	TRMT10C
					PLEKHN1	ADPRHL2
					ULK1	SARS2
					CASP8	MRPL16
					ACAD11	SDHAF2
					TOMM40L	TMEM70
					TMEM126A	THG1L
					ALKBH7	SLC25A38
					CHCHD5	SLC35F6
					CARD19	PPOX
					NOA1	ACSM5
					COQ5	OXSM
					SLC25A33	2020-03-02
					DNAJC30	AURKAIP1
					UQCC2	RMND1
					CHCHD6	TRMT61B
					MRPL45	PPP1CC
					GFM2	MCUB
					CASQ1	STX17
					C15orf48	C14orf119
					GNPAT	PTCD3
					ACSS1	MRPL20
					MRPL43	PDPR
					MCEE	OXR1
					CAT	ARGLU1
					COX4I2	DMAC2
					GPT2	HEATR1
					MGARP	ANKZF1
					OGT	MTPAP
					USP30	PPP2CA
					MPV17L2	MSTO1
					RTN4IP1	DARS2
					ATP5MD	MRPS18A
					CBR4	MRPS10
					RPUSD4	RMDN3
					AIFM2	MRM3
					MIGA2	PPP2R1A
					CEP89	SLC25A36
					ATG4D	PPP2R2B
					COX14	ATAD3A
					PHYKPL	TMLHE
					PARG	UQCC1
					ATCAY	TMEM143
					CABS1	ECHDC2
					GFM1	QRSL1
					KMO	RHOT1
					SLC25A12	FBXW7
					ALDH4A1	PPP3CA
					BECN1	RSAD1
					PNPT1	AGPAT5
					CDS2	PPP3CC
					SUCLG2	SYNJ2BP
					SUCLG1	NIPSNAP3B
					SUCLA2	PPP3R1
					TMEM11	GIMAP5
					CCNB1	ABHD10
					WASF1	CHDH
					SLC25A21	HJURP
					FATE1	PI4K2A
					RHOT2	PPP6C
					SLC25A14	LRRC59
					BMF	GDF5OS
					GADD45GIP1	NDUFAF7
					NFS1	PARL
					MCU	DHTKD1
					TIMM29	ENOSF1
					LYRM7	FOXRED1
					STARD13	AMBRA1
					COX19	PRKACA
					DMAC1	MFN1
					DNAJA3	TRMU
					SLC25A46	IARS2
					AIFM1	DNAJC11
					ATP23	VPS35
					RNF185	NAXD
					RSAD2	COA1
					C12orf65	AGK
					COX7A2L	OGDHL
					SMDT1	DHX32
					NDUFAF2	PRKCA
					SLC25A51	DDX28
					MTG1	ADAP2
					MRPS36	PRKCE
					TBRG4	ADCY10
					MRRF	AL049834.1
					LDHAL6B	PECR
					ATXN3L	CISD1
					TIMM50	PSENEN
					MARS2	ACOT13
					COQ10A	TMEM126B
					LONP1	ACSS2
					COX5A	MAPK1
					FTMT	MAPK3
					SFXN1	NDUFA12
					SFXN5	SLC25A40
					ABCG2	MAPK8
					MAPK8IP1	MAPK9
					SLC25A27	MAPK10
					PGS1	MAP2K1
					PMPCB	MAP2K2
					ATP5MF	GSDMC
					MRPL33	MTFR1L
					ATP5MPL	PRODH
					IKBKE	KYAT3
					SLC25A44	KLK6
					KIAA0391	DIABLO
					SNPH	ASAH2
					MRPL19	PSEN1
					TOMM20	TWNK
					ARMCX2	TRIM39
					CDK1	AGPAT4
					TRIM14	NDUFA4L2
					TOMM70	STARD7
					MFN2	MCCC1
					EXOG	CMC2
					SCO2	ENY2
						MRPS22
						MFF
						NT5M
						WDR93
						TOMM22
						COQ8A
						SDHAF3
						AKR1B10
						COQ9
						CIAPIN1
						RARS2
						PLSCR3
						TIGAR
						PDSS2
						LYRM4
						MRPL47
						PAK5
						SMURF1
						VARS2
						BAD
						PTEN
						MRS2
						DHFRP1
						ABHD6
						NLN
						AARS2
						MAVS
						MTUS1
						PDP2
						TRMT5
						GPAM
						BAK1
						POLD4
						CCAR2
						PTPN11
						PTS
						BAX
						NGB
						ABCD3
						PYCR1
						ALDH18A1
						SQOR
						CREBZF
						PRODH2
						QARS
						BCAT1
						BCAT2
						RAD51
						RAD51C
						RAF1
						RANBP2
						RAP1GDS1
						BCKDHA
						BCKDHB
						BCL2
						BCL2A1
						BCL2L1
						BCL2L2
						RGS2
						RMRP
						C12orf10
						SLC25A19
						RNASEL
						RNF5
						MRPS35
						NIF3L1
						CCDC90B
						FASTKD5
						ELAC2
						GUF1
						ABCE1
						MRPL23
						BCS1L
						MRPL12
						MRPS12
						RPS3
						RPS6KB1
						BDH1
						RPS27A
						BDNF
						ACSM3
						MAPK12
						SCO1
						SCP2
						BID
						BIK
						MRPL17
						SDHA
						NSUN3
						SDHB
						DUSP21
						SDHC
						SDHD
						XPNPEP3
						MRPS14
						MCUR1
						TP53AIP1
						OXCT2
						PERP
						GOLPH3
						MCCC2
						MOAP1
						NOD2
						PDF
						OSGEPL1
						TFB2M
						NOC3L
						C15orf62
						HS1BP3
						HIF3A
						SDHAF1
						MRPS25
						SGK1
						SHC1
						STMP1
						SHMT2
						METTL17
						ACBD3
						ATPAF1
						2020-03-01
						CEP85
						P2RY12
						KLC2
						ETNPPL
						AGXT2
						MRPL14
						MRPS26
						MRPS24
						MRPS15
						MRPS11
						MRPS9
						MRPS6
						MRPS5
						MRPL41
						MRPL40
						MRPL38
						MRPL36
						MRPL34
						MRPL32
						MRPL11
						MRPL9
						MRPL1
						NDRG4
						PINK1
						REEP1
						MRPL44
						NOL6
						TMEM135
						COA7
						SLC8A1
						SLC8A3
						SLC9A1
						SLC25A1
						SLC22A4
						SLIT3
						CAPRIN2
						FUNDC2
						MRPS34
						TRAK2
						BNIP1
						SNCA
						BNIP3
						SOD1
						SOD2
						BNIP3L
						SORD
						SOX4
						BOK
						SOX10
						SPG7
						BPHL
						SRC
						SRI
						SREBF2
						BRAF
						SSBP1
						STAR
						STAT3
						STK11
						STXBP1
						BSG
						SUOX
						SUPV3L1
						ABCC8
						SURF1
						VAMP1
						BTD
						TAT
						TAZ
						TMBIM6
						TERT
						TFAM
						TFAP2C
						TFAP4
						TFDP1
						TFDP2
						TGM2
						TH
						TSPO
						AC006538.1
						C1QBP
						TK2
						TNFRSF1A
						TOP3A
						TP53
						TP53BP2
						TP73
						TRAF3
						TST
						D2HGDH
						TUFM
						DNLZ
						FAM72A
						TXNRD1
						TYMS
						DNM1P34
						ACOD1
						UBA52
						UBB
						UBC
						UBA1
						UCP1
						UCP2
						UCP3
						UNG
						UQCRB
						UQCRC1
						UQCRC2
						UQCRFS1
						UQCRH
						UROS
						MRPL49
						VDAC1
						VDAC2
						VDAC3
						VHL
						TRPV1
						VRK2
						XPC
						CSKMT
						XRCC3
						YWHAB
						YWHAE
						YWHAG
						YWHAH
						YWHAZ
						CFAP410
						CA5A
						ZNF205
						ZNF217
						DAP3
						SLC25A20
						MRPL57
						SECISBP2
						FASTKD3
						DCTPP1
						SLC25A23
						UQCC3
						NDUFAF5
						APOO
						CHCHD7
						ALDH5A1
						HSD17B8
						HAUS3
						MAIP1
						CHPF
						CARS2
						MRPL24
						MUL1
						ACSS3
						NLRX1
						FASTKD1
						RTL10
						QTRT2
						YRDC
						LRRK1
						NARS2
						TEFM
						ECHDC3
						SLC25A22
						MTERF1
						SUGCT
						PTCD2
						AGMAT
						FAM124B
						RBFA
						TUSC3
						MRM1
						COQ8B
						L2HGDH
						DGLUCY
						SLC8B1
						PANK2
						CALM1
						PIF1
						PTGES2
						MYO19
						HKDC1
						OPA3
						COQ10B
						ACSF2
						TARS2
						NUBPL
						WDR26
						GRPEL1
						MTERF2
						EFHD1
						FLAD1
						SPHKAP
						PUS1
						DNAJC5
						SLC25A16
						COASY
						PDHX
						ACAD10
						IQCN
						TMEM177
						CYB5B
						CALM3
						SLC25A32
						CAMK2A
						RCC1L
						CLPB
						ACSBG2
						MAP1LC3B
						AKAP1
						ISCA1
						SFXN3
						FAHD1
						QTRT1
						SLIRP
						SLC25A28
						CLPP
						GATD3A
						PNPLA4
						CAPN1
						CAPN2
						SNN
						FZD9
						SLC25A31
						ABHD11
						CASP2
						CCM2
						C19orf12
						ZMIZ2
						SELENOO
						PARP9
						SESN2
						HSDL1
						CASP4
						SLC25A18
						ARMC10
						ATAD3B
						BCO2
						SLC25A2
						IMMP2L
						PLA2G6
						IFI27L2
						SPNS1
						SLC25A11
						PLEKHN1
						ULK1
						CASP8
						ACAD11
						TOMM40L
						USP48
						CASP9
						TMEM126A
						RHBDD1
						BBOX1
						TCHP
						HSDL2
						ALKBH7
						CHCHD5
						CARD19
						NOA1
						COQ5
						SLC25A33
						DNAJC30
						UQCC2
						CHCHD6
						MRPL45
						APOPT1
						GFM2
						CASQ1
						C15orf48
						GNPAT
						ACSS1
						MRPL43
						TNRC18
						DGAT2
						HINT2
						MCEE
						CAT
						COX4I2
						GTPBP3
						GPT2
						MGARP
						OGT
						USP30
						MPV17L2
						RTN4IP1
						ATP5MD
						CBR4
						RPUSD4
						AIFM2
						MIGA2
						CEP89
						SERAC1
						ATG4D
						COX14
						PHYKPL
						PARG
						NIPSNAP1
						LIPF
						ATCAY
						LGALS12
						AGPS
						CABS1
						GFM1
						DEGS1
						KMO
						SLC25A12
						TP63
						DYNLL1
						ALDH4A1
						BECN1
						S1PR4
						PNPT1
						URI1
						GBF1
						RIPK1
						HRK
						CDS2
						NAPG
						PEX11B
						SUCLG2
						SUCLG1
						SUCLA2
						KYAT1
						TMEM11
						CCN6
						ALKBH1
						SQSTM1
						CPNE3
						CCNB1
						RAB29
						WASF1
						KYNU
						SLC25A21
						MAATS1
						FATE1
						RHOT2
						AC074143.1
						HAP1
						SLC25A14
						HIP1R
						FAM110B
						BMF
						GADD45GIP1
						STPG1
						NFS1
						MCU
						TIMM29
						LYRM7
						STARD13
						COX19
						DMAC1
						DNAJA3
						SLC25A46
						AIFM1
						ATP23
						RNF185
						RSAD2
						C12orf65
						FIBP
						ATPAF2
						COX7A2L
						SMDT1
						MYOM2
						DDX21
						NDUFAF2
						SLC25A51
						MTG1
						MRPS36
						GLYATL1
						TBRG4
						MRRF
						LDHAL6B
						ATXN3L
						TSPOAP1
						TIMM50
						MGME1
						MARS2
						COQ10A
						GTF3C4
						MYL10
						LONP1
						COX5A
						ATP5IF1
						FTMT
						SFXN1
						SFXN5
						ABCG2
						AIM2
						PICK1
						SH3BP5
						MAPK8IP1
						SLC25A27
						PGS1
						PMPCB
						BAG5
						PTGES
						ATP5MF
						MRPL33
						ATP5MPL
						MTRF1
						ABCG1
						IKBKE
						MTFR1
						SLC25A44
						KIAA0391
						NOS1AP
						SNPH
						ATG13
						DLGAP5
						MRPL19
						TOMM20
						DELE1
						ARMCX2
						CDK1
						TRIM14
						TOMM70
						MFN2
						EXOG
						USP15
						CASP8AP2
						SCO2
